# Supplementary material for: Astaxanthin from Haematococcus pluvialis alleviates obesity by modulating lipid metabolism and gut microbiota in mice fed a high-fat diet
Source: Royal Society of Chemistry journal article supplement (doi:10.1039/d1fo01495a), 2021-01-01
Supplement: d1fo01495a1.pdf [file d1fo01495a1.pdf]

Table. S1 The composition of experimental diet.

| Ingredient                | ND/g   | HFD/g  |
|---------------------------|--------|--------|
| casein                    | 189.58 | 233.06 |
| L-cystine                 | 2.84   | 3.5    |
| Cornstarch                | 298.59 | 84.83  |
| Maltodextrin              | 33.18  | 116.53 |
| Sucrose                   | 331.77 | 201.36 |
| Cellulose                 | 47.4   | 58.26  |
| Soybean oil               | 23.7   | 29.13  |
| Lard                      | 18.96  | 206.84 |
| M1002 mineral mix         | 9.48   | 11.65  |
| Calcium hydrogenphosphate | 12.32  | 15.15  |
| Calcium carbonate         | 5.21   | 6.41   |
| Potassium citrate         | 15.64  | 19.23  |
| V1001 vitamin mixture     | 9.48   | 11.56  |
| Choline bitartrate        | 1.9    | 1.9    |
| Food dye                  | 0.047  | 0.058  |
| Total                     | 1000   | 1000   |

Table. S2 Primer sequences used for qRT-PCR

| Gene           | Primer Sequence                |
|----------------|--------------------------------|
| <i>β-Actin</i> | F:5'-AGGCTGTGCTGTCCCTGTAT-3'   |
|                | R:5'-ACCCAAGAAGGAAGGCTGGA-3'   |
| <i>AMPK</i>    | F:5'-AGTGTTCCGAGGAGGAGGT-3'    |
|                | R:5'-TGTCTATGATGAGGTGGTAGGC-3' |
| <i>SREBP1c</i> | F:5'-TTCAGAAGTTGCGGTCACAC-3'   |
|                | R:5'-CTGGTTGCTCTGCTGAAG-3'     |
| <i>PPARα</i>   | F:5'-TCCACGAAGCCTACCTGAAG-3'   |
|                | R:5'-GAATCGGACCTCTGCCTCTT-3'   |
| <i>AdipoR1</i> | F:5'-GTCAAACGTGACGGCTCTCC-3'   |
|                | R:5'-GTCAAACGTGACGGCTCTCC-3'   |
| <i>FAS</i>     | F:5'-AAGGAGTACATGGACAAGAACC-3' |
|                | R:5'-CAGGAGAATCGCAGTAGAAGTC-3' |
| <i>LXRα</i>    | F:5'-ATTCTTCCGCCGAGTGT-3'      |
|                | R:5'-AGGACTTGAGGAGGTGAGGA-3'   |
| <i>SCD-1</i>   | F:5'-CACAACTACCACCACACCTTC-3'  |
|                | R:5'-CCGTCTCCAGTTCTCTTAATCC-3' |

Fig. S1

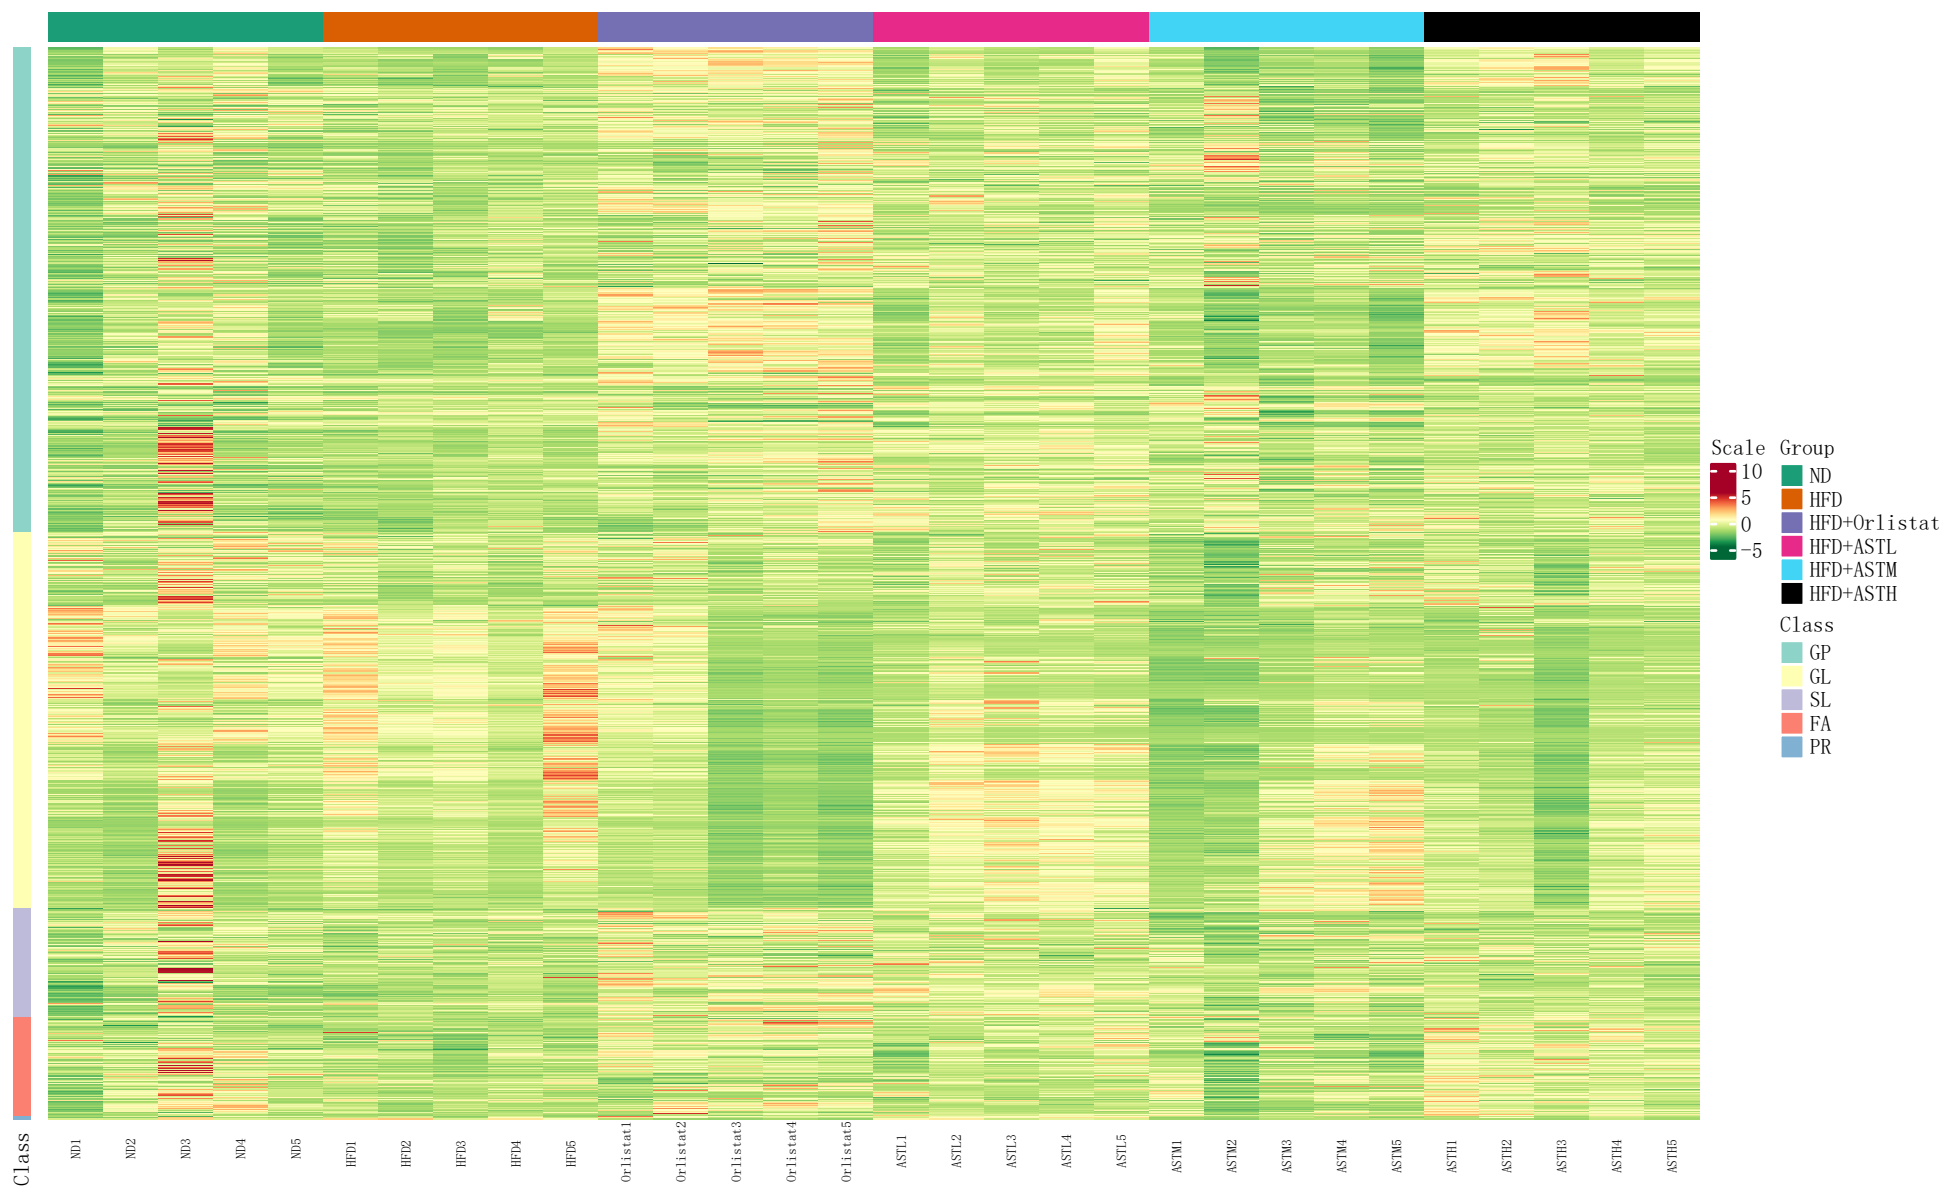

Fig. S2

A

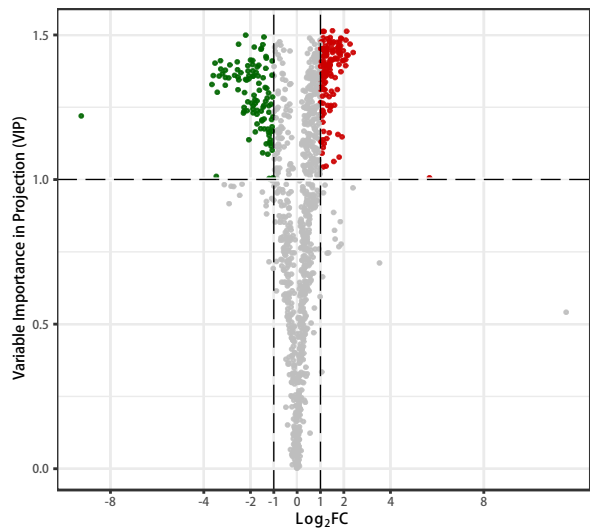

Statistics ● Down: 108 ● Insignificant: 801 ● Up: 149

B

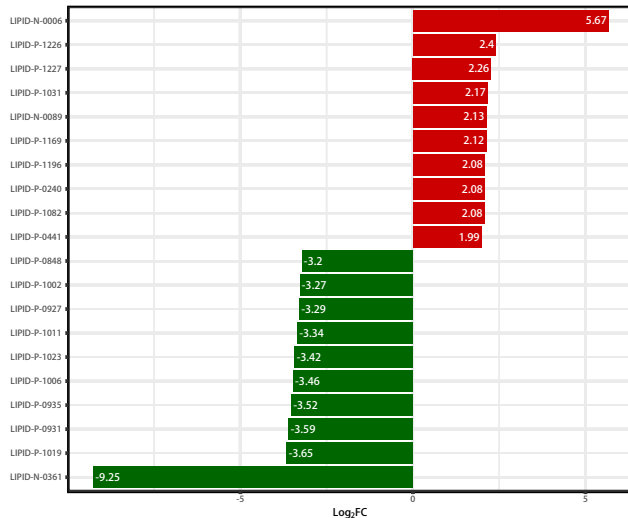

C

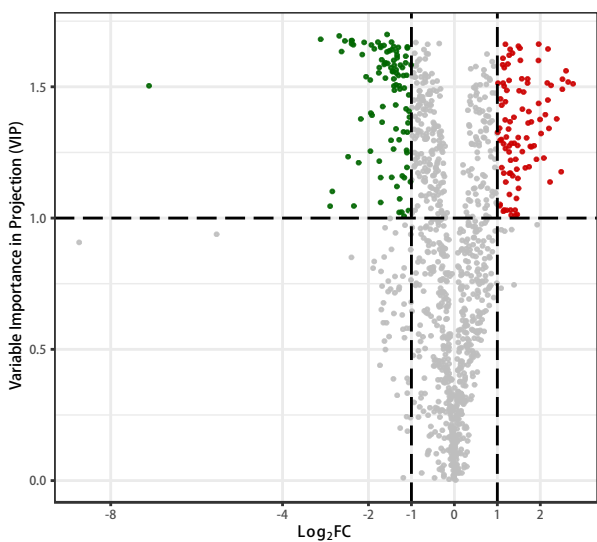

Statistics ● Down: 99 ● Insignificant: 863 ● Up: 96

D

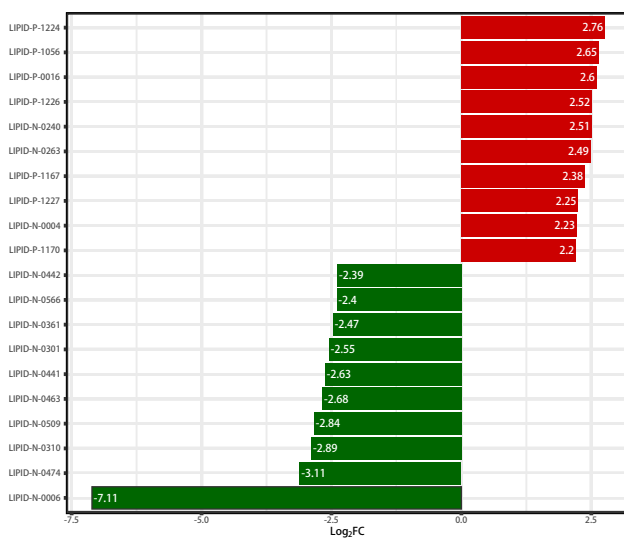



Fig. S4

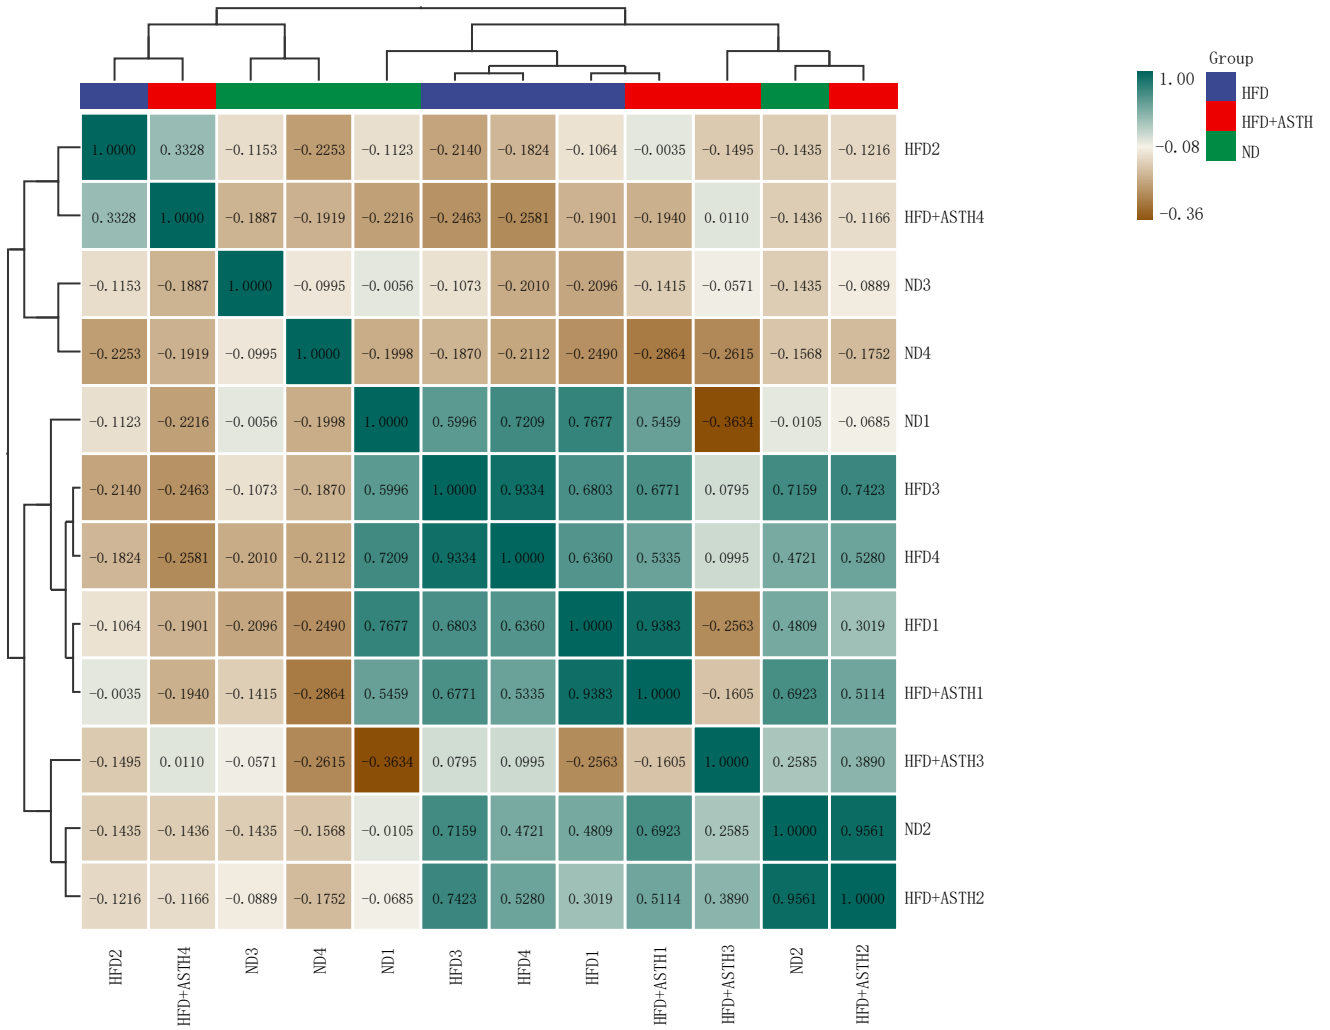

Table. S3

The statistics of metabolites

| Index       | Compounds                     | 物质               | Class I | 物质一级分类 | Class II   | 物质二级分类 | Formula     | ND1     | ND2      | ND3      | ND4      | ND5      | HFD1     | HFD2     | HFD3     | HFD4     | HFD5     | AST-H1   | AST-H2   | AST-H3   | AST-H4   | AST-H5   |
|-------------|-------------------------------|------------------|---------|--------|------------|--------|-------------|---------|----------|----------|----------|----------|----------|----------|----------|----------|----------|----------|----------|----------|----------|----------|
| LPID-N-0001 | taurothiocholic acid-3-sulf   | 牛磺石胆酸-3-硫酸盐      | FA      | 脂防酸类   | BA         | 胆汁酸    | C26H45NO8S2 | 11522   | 15459    | 7839.2   | 11800    | 10072    | 13054    | 12119    | 14121    | 9781.6   | 11078    | 8262.5   | 13742    | 22839    | 14915    | 17257    |
| LPID-N-0004 | 3-oxodeoxycholic acid         | 3-氧化脱氧胆酸         | FA      | 脂防酸类   | BA         | 胆汁酸    | C24H38O3    | 25465   | 90553    | 63403    | 77285    | 73371    | 49038    | 52369    | 29747    | 49814    | 43910    | 146700   | 70403    | 93518    | 119490   | 67422    |
| LPID-N-0005 | Chenodeoxycholic acid         | 鹅脱氧胆酸            | FA      | 脂防酸类   | BA         | 胆汁酸    | C24H40O4    | 61719   | 225940   | 184350   | 181760   | 187970   | 159230   | 148160   | 123030   | 114910   | 180510   | 234200   | 222160   | 242970   | 218900   | 234290   |
| LPID-N-0006 | Ursodeoxycholic acid          | 熊脱氧胆酸            | FA      | 脂防酸类   | BA         | 胆汁酸    | C24H40O4    | 9       | 9        | 9        | 9        | 9        | 49499    | 9        | 9        | 9        | 9        | 9        | 9        | 78923    | 9        | 9        |
| LPID-N-0007 | norcholic acid                | 去甲胆酸             | FA      | 脂防酸类   | BA         | 胆汁酸    | C24H38O3    | 270310  | 118350   | 91951    | 143030   | 184840   | 264300   | 307750   | 158660   | 131310   | 222200   | 228290   | 302310   | 340480   | 215600   | 169160   |
| LPID-N-0009 | 12-Oxocholestenoylcholic acid | 12-氧代鹅脱氧胆酸       | FA      | 脂防酸类   | BA         | 胆汁酸    | C24H38O3    | 9       | 9        | 375120   | 9        | 9        | 9        | 9        | 76402    | 9        | 9        | 109200   | 173340   | 9        | 163990   | 197480   |
| LPID-N-0010 | Ursolic acid                  | 熊胆酸              | FA      | 脂防酸类   | BA         | 胆汁酸    | C24H40O5    | 1366800 | 641310   | 5404400  | 920000   | 826800   | 1066600  | 907230   | 1828800  | 792850   | 1350100  | 2740300  | 3783900  | 557930   | 3514400  | 3989500  |
| LPID-N-0014 | lithocholic acid-3-sulfate    | 石胆酸-3-硫酸盐        | FA      | 脂防酸类   | BA         | 胆汁酸    | C24H38O3    | 67061   | 9        | 104690   | 98806    | 9        | 9        | 9        | 9        | 9        | 9        | 53638    | 91735    | 9        | 97881    | 9        |
| LPID-N-0015 | Glycocholic acid              | 甘氨酸胆酸            | FA      | 脂防酸类   | BA         | 胆汁酸    | C26H43NO6   | 138000  | 71835    | 110850   | 114600   | 97412    | 125080   | 143750   | 122210   | 113760   | 126410   | 155650   | 191670   | 193360   | 156020   | 136070   |
| LPID-N-0016 | Taurochenodeoxycholic acid    | 牛磺鹅脱氧胆酸          | FA      | 脂防酸类   | BA         | 胆汁酸    | C26H45NO6S  | 6325000 | 8985100  | 23480000 | 14588000 | 6178600  | 15348000 | 15632000 | 22262000 | 12983000 | 17293000 | 18520000 | 42361000 | 12152000 | 26630000 | 45436000 |
| LPID-N-0017 | Taurocholic acid              | 牛磺胆酸             | FA      | 脂防酸类   | BA         | 胆汁酸    | C26H45NO7S  | 2800200 | 2700000  | 15254000 | 4940800  | 2257200  | 8304900  | 7002200  | 12357000 | 6425200  | 9905400  | 10721000 | 18774000 | 3580300  | 15236000 | 20943000 |
| LPID-N-0022 | 12,13-EpOME                   | 氧化脂质_12,13-EpOME | FA      | 脂防酸类   | Eicosanoid | 氧化脂质   | C18H32O3    | 24716   | 25770    | 34642    | 22778    | 26282    | 19510    | 34673    | 15426    | 40776    | 21923    | 151840   | 51983    | 63040    | 116420   | 52398    |
| LPID-N-0023 | 9,10-EpOME                    | 氧化脂质_9,10-EpOME  | FA      | 脂防酸类   | Eicosanoid | 氧化脂质   | C18H32O3    | 20697   | 25356    | 37673    | 22085    | 21052    | 19100    | 33520    | 10988    | 36843    | 18268    | 141310   | 52333    | 81756    | 126240   | 55049    |
| LPID-N-0024 | FFA(20:5)                     | 氧化脂质_FF(20:5)    | FA      | 脂防酸类   | Eicosanoid | 游离脂防酸  | C20H38O2    | 273990  | 307740   | 275960   | 371020   | 241750   | 159110   | 136270   | 179590   | 149750   | 184840   | 701710   | 716240   | 64780    | 543780   | 729580   |
| LPID-N-0026 | 9,10-DiHOME                   | 氧化脂质_9,10-DiHOME | FA      | 脂防酸类   | Eicosanoid | 氧化脂质   | C18H34O4    | 9929.8  | 4695.8   | 9064.4   | 9        | 6105.7   | 4883.2   | 9        | 3055     | 4371.5   | 2764     | 28078    | 15356    | 8883.5   | 26831    | 12333    |
| LPID-N-0032 | 15-oxoETE                     | 氧化脂质_15-oxoETE   | FA      | 脂防酸类   | Eicosanoid | 氧化脂质   | C20H38O3    | 525800  | 559460   | 559620   | 547580   | 498460   | 1057900  | 776860   | 705620   | 598040   | 531710   | 599580   | 559070   | 540730   | 529880   | 542400   |
| LPID-N-0034 | (9)12-HETE                    | 氧化脂质_(9)12-HETE  | FA      | 脂防酸类   | Eicosanoid | 氧化脂质   | C20H32O3    | 141160  | 18459    | 17881    | 12235    | 31307    | 13152    | 34335    | 21451    | 38109    | 7184.2   | 111720   | 15406    | 8598.9   | 71005    | 46749    |
| LPID-N-0035 | (9)15-HETE                    | 氧化脂质_(9)15-HETE  | FA      | 脂防酸类   | Eicosanoid | 氧化脂质   | C20H32O3    | 8155.6  | 8645     | 12891    | 7872     | 7350.9   | 5667.9   | 4427.7   | 3269.8   | 7694.8   | 3848.2   | 11909    | 8396.5   | 11264    | 13362    | 7312.8   |
| LPID-N-0039 | (9)5-HETE                     | 氧化脂质_(9)5-HETE   | FA      | 脂防酸类   | Eicosanoid | 氧化脂质   | C20H32O3    | 4455.4  | 4466.7   | 3518.2   | 3643.3   | 3657.6   | 4190.2   | 9        | 9        | 9        | 3952.9   | 8411.1   | 7988.7   | 3396.2   | 6894.9   | 4700.2   |
| LPID-N-0041 | 11(S)-HETE                    | 氧化脂质_11(S)-HETE  | FA      | 脂防酸类   | Eicosanoid | 氧化脂质   | C20H32O3    | 21962   | 38929    | 37917    | 23013    | 33908    | 13546    | 18722    | 12723    | 23177    | 15685    | 52955    | 27483    | 23033    | 54196    | 25908    |
| LPID-N-0056 | PGE2                          | 氧化脂质_PGE2        | FA      | 脂防酸类   | Eicosanoid | 氧化脂质   | C20H32O5    | 4511.2  | 4307.6   | 6745.1   | 5965.2   | 6661.3   | 3137.9   | 4687.5   | 2857.6   | 5456.4   | 9        | 11879    | 6065.6   | 3422.8   | 10937    | 5342.4   |
| LPID-N-0057 | PGF2a                         | 氧化脂质_PGF2a       | FA      | 脂防酸类   | Eicosanoid | 氧化脂质   | C20H34O5    | 5757    | 7833.6   | 6083.7   | 12960    | 9478.8   | 5396.6   | 10324    | 4935.9   | 10791    | 7671.4   | 16764    | 11220    | 10346    | 17368    | 12886    |
| LPID-N-0060 | PGE1                          | 氧化脂质_PGE1        | FA      | 脂防酸类   | Eicosanoid | 氧化脂质   | C20H34O5    | 5108.1  | 5825.5   | 5843.7   | 4841     | 4836.2   | 9        | 9        | 9        | 3833.2   | 2906.7   | 12369    | 6906.2   | 2738.7   | 9067.8   | 4562.5   |
| LPID-N-0062 | TxB3                          | 氧化脂质_TxB3        | FA      | 脂防酸类   | Eicosanoid | 氧化脂质   | C20H32O6    | 91913   | 6713.9   | 9        | 8853.3   | 12820    | 34119    | 64040    | 18965    | 12013    | 25700    | 23399    | 25604    | 33858    | 23600    | 10286    |
| LPID-N-0063 | TXB2                          | 氧化脂质_TXB2        | FA      | 脂防酸类   | Eicosanoid | 氧化脂质   | C20H34O6    | 13987   | 8674.6   | 15570    | 7913.2   | 10334    | 3490.8   | 10929    | 3046.6   | 10541    | 3202.5   | 27844    | 8139.5   | 6817.9   | 26001    | 8229.5   |
| LPID-N-0067 | FA(10:0)                      | 十烷酸              | FA      | 脂防酸类   | FFA        | 游离脂防酸  | C10H20O2    | 1262300 | 845110   | 1518400  | 1464900  | 1598400  | 1109000  | 1654100  | 1252000  | 1442100  | 1752900  | 1323500  | 1863400  | 1442900  | 1699100  | 1867600  |
| LPID-N-0071 | FA(14:0)                      | 肉豆蔻酸             | FA      | 脂防酸类   | FFA        | 游离脂防酸  | C14H28O2    | 699100  | 708420   | 1094800  | 1006100  | 664230   | 652720   | 593730   | 499130   | 591070   | 498610   | 694920   | 555880   | 705930   | 566030   | 607600   |
| LPID-N-0072 | FA(15:0)                      | 十五烷酸             | FA      | 脂防酸类   | FFA        | 游离脂防酸  | C15H30O2    | 402430  | 307240   | 678510   | 393660   | 382690   | 417100   | 395460   | 281440   | 631130   | 424390   | 639330   | 700380   | 929140   | 661280   | 787560   |
| LPID-N-0073 | FA(16:0)                      | 棕榈酸              | FA      | 脂防酸类   | FFA        | 游离脂防酸  | C16H32O2    | 777600  | 9017700  | 10302000 | 9361200  | 7967400  | 6769200  | 8215200  | 6329600  | 8014100  | 6333000  | 9536300  | 9215100  | 11947000 | 7271600  | 10188000 |
| LPID-N-0074 | FA(17:0)                      | 十七烷酸             | FA      | 脂防酸类   | FFA        | 游离脂防酸  | C17H34O2    | 237260  | 208960   | 455510   | 343340   | 347070   | 410390   | 495400   | 233890   | 572190   | 302560   | 866220   | 761440   | 937350   | 647620   | 747720   |
| LPID-N-0075 | FA(18:0)                      | 硬脂酸              | FA      | 脂防酸类   | FFA        | 游离脂防酸  | C18H36O2    | 5770900 | 5341500  | 4569000  | 5523200  | 5215500  | 4455600  | 4930300  | 4070600  | 6834900  | 4010600  | 6630800  | 5654600  | 8101500  | 6113400  | 5843000  |
| LPID-N-0076 | FA(20:0)                      | 花生酸              | FA      | 脂防酸类   | FFA        | 游离脂防酸  | C20H40O2    | 737690  | 453810   | 1171100  | 521120   | 268770   | 583680   | 557380   | 320280   | 417810   | 565850   | 632150   | 683010   | 707940   | 724970   | 513710   |
| LPID-N-0079 | FA(24:0)                      | 二十四烷酸            | FA      | 脂防酸类   | FFA        | 游离脂防酸  | C24H48O2    | 22540   | 204680   | 366700   | 179210   | 177890   | 225390   | 145220   | 104440   | 222860   | 207900   | 287580   | 320000   | 256670   | 285980   | 232570   |
| LPID-N-0080 | FA(14:1)                      | 肉豆蔻酸             | FA      | 脂防酸类   | FFA        | 游离脂防酸  | C14H26O2    | 15310   | 152980   | 303700   | 186040   | 182920   | 90078    | 9        | 9        | 66205    | 9        | 100550   | 9        | 104670   | 9        | 9        |
| LPID-N-0082 | FA(16:1)                      | 棕榈油酸             | FA      | 脂防酸类   | FFA        | 游离脂防酸  | C16H32O2    | 7963200 | 8216400  | 9615400  | 11766000 | 8438400  | 6329900  | 5279700  | 4450000  | 5733600  | 5371700  | 6905200  | 4015400  | 6641500  | 6293000  | 4611300  |
| LPID-N-0083 | FA(17:1)                      | 十七烷酸             | FA      | 脂防酸类   | FFA        | 游离脂防酸  | C17H32O2    | 1293100 | 1498900  | 1977000  | 2074200  | 1485600  | 1672900  | 1929400  | 1344200  | 2470400  | 1876100  | 3071900  | 1888500  | 2653300  | 2322500  | 2069100  |
| LPID-N-0084 | FA(18:1)                      | 油酸               | FA      | 脂防酸类   | FFA        | 游离脂防酸  | C18H34O2    | 2142100 | 2457000  | 25785000 | 31136000 | 22974000 | 22049000 | 20894000 | 16790000 | 26263000 | 20515000 | 24006000 | 19459000 | 28733000 | 22762000 | 22724000 |
| LPID-N-0085 | FA(19:1)                      | 十九碳一烯酸           | FA      | 脂防酸类   | FFA        | 游离脂防酸  | C19H36O2    | 425410  | 443680   | 928450   | 685280   | 459160   | 655930   | 543820   | 271890   | 757800   | 469600   | 608130   | 521540   | 791140   | 434200   | 446880   |
| LPID-N-0086 | FA(20:1)                      | 二十碳一烯酸           | FA      | 脂防酸类   | FFA        | 游离脂防酸  | C20H38O2    | 5938800 | 4367100  | 6828000  | 7214300  | 4841700  | 6092500  | 4186700  | 2589500  | 4346400  | 4630300  | 4304700  | 2914600  | 3349000  | 4502900  | 3981900  |
| LPID-N-0087 | FA(22:1)                      | 芥酸               | FA      | 脂防酸类   | FFA        | 游离脂防酸  | C22H42O2    | 958230  | 629290   | 1054600  | 1003900  | 567210   | 693420   | 526780   | 326010   | 544830   | 851770   | 631560   | 566750   | 437620   | 443320   | 461930   |
| LPID-N-0088 | FA(24:1)                      | 神经酸              | FA      | 脂防酸类   | FFA        | 游离脂防酸  | C24H46O2    | 199800  | 289560   | 710460   | 304890   | 252370   | 205670   | 238150   | 105460   | 227920   | 235670   | 151290   | 131550   | 84286    | 145990   | 149910   |
| LPID-N-0089 | FA(16:2)                      | 十六碳二烯酸           | FA      | 脂防酸类   | FFA        | 游离脂防酸  | C16H32O2    | 44428   | 92393    | 245770   | 70756    | 94507    | 69423    | 126980   | 71043    | 153610   | 119910   | 386480   | 391100   | 912150   | 332460   | 407960   |
| LPID-N-0090 | FA(18:2)                      | 亚油酸              | FA      | 脂防酸类   | FFA        | 游离脂防酸  | C18H32O2    | 9326800 | 10209000 | 11946000 | 9206000  | 9284200  | 9647800  | 10537000 | 8780200  | 11859000 | 10535000 | 15976000 | 17388000 | 18646000 | 16648000 | 16899000 |
| LPID-N-0091 | FA(20:2)                      | 二十碳二烯酸           | FA      | 脂防酸类   | FFA        | 游离脂防酸  | C20H36O2    | 1845400 | 1944700  | 4585600  | 3218800  | 2089100  | 2031000  | 1702200  | 1230700  | 1959500  | 1667200  | 2583300  | 1957600  | 2104500  | 2131000  | 2156100  |
| LPID-N-0092 | FA(22:2)                      | 二十二碳二烯酸          | FA      | 脂防酸类   | FFA        | 游离脂防酸  | C22H40O2    | 364030  | 267180   | 726680   | 474040   | 271900   | 245060   | 215750   | 171300   | 262530   | 377920   | 378920   | 296420   | 263440   | 264660   | 350180   |
| LPID        |                               |                  |         |        |            |        |             |         |          |          |          |          |          |          |          |          |          |          |          |          |          |          |

| Index        | Compounds     | 物质                     | Class I | 物质一級分类 | Class II | 物质二級分类   | Formula    | ND1     | ND2      | ND3      | ND4      | ND5      | HF1      | HF2      | HF3      | HF4      | HF5      | AST-H1   | AST-H2   | AST-H3   | AST-H4   | AST-H5   |
|--------------|---------------|------------------------|---------|--------|----------|----------|------------|---------|----------|----------|----------|----------|----------|----------|----------|----------|----------|----------|----------|----------|----------|----------|
| LIPID-N-0141 | LPE(17:0/0)   | 溶血磷脂酰乙醇胺_LPE(17:0/0:0) | GP      | 甘油磷脂类  | LPE      | 溶血磷脂酰乙醇胺 | C21H44NO7P | 99568   | 473740   | 431780   | 443150   | 302130   | 306300   | 231500   | 285110   | 234620   | 426410   | 973500   | 1186900  | 1119900  | 661610   | 987270   |
| LIPID-N-0148 | LPE(17:1/0:0) | 溶血磷脂酰乙醇胺_LPE(17:1/0:0) | GP      | 甘油磷脂类  | LPE      | 溶血磷脂酰乙醇胺 | C21H42NO7P | 19696   | 106440   | 103240   | 106050   | 69798    | 92880    | 60130    | 72669    | 56688    | 100820   | 148250   | 182880   | 204330   | 113640   | 140920   |
| LIPID-N-0149 | LPE(0:0/18:1) | 溶血磷脂酰乙醇胺_LPE(0:0/18:1) | GP      | 甘油磷脂类  | LPE      | 溶血磷脂酰乙醇胺 | C23H46NO7P | 3862400 | 23259000 | 17644000 | 30686000 | 13785000 | 14310000 | 8300000  | 10625000 | 8683600  | 15216000 | 23393000 | 27899000 | 30638000 | 16237000 | 22677000 |
| LIPID-N-0150 | LPE(18:1/0:0) | 溶血磷脂酰乙醇胺_LPE(18:1/0:0) | GP      | 甘油磷脂类  | LPE      | 溶血磷脂酰乙醇胺 | C23H46NO7P | 3761900 | 23792000 | 18258000 | 29877000 | 13494000 | 14321000 | 8239700  | 10216000 | 8506900  | 15152000 | 23476000 | 28263000 | 32393000 | 17264000 | 22437000 |
| LIPID-N-0153 | LPE(22:1/0:0) | 溶血磷脂酰乙醇胺_LPE(22:1/0:0) | GP      | 甘油磷脂类  | LPE      | 溶血磷脂酰乙醇胺 | C27H54NO7P | 7672.4  | 27342    | 21203    | 26055    | 13971    | 9374.4   | 5796.6   | 7813.7   | 6499.5   | 13630    | 25468    | 31577    | 28112    | 13625    | 23636    |
| LIPID-N-0157 | LPE(18:3/0:0) | 溶血磷脂酰乙醇胺_LPE(18:3/0:0) | GP      | 甘油磷脂类  | LPE      | 溶血磷脂酰乙醇胺 | C23H42NO7P | 40289   | 117810   | 133380   | 127240   | 75047    | 73752    | 63990    | 63258    | 80677    | 78433    | 175420   | 228800   | 332410   | 135880   | 221880   |
| LIPID-N-0159 | LPE(20:3/0:0) | 溶血磷脂酰乙醇胺_LPE(20:3/0:0) | GP      | 甘油磷脂类  | LPE      | 溶血磷脂酰乙醇胺 | C25H46NO7P | 502380  | 674020   | 593380   | 928810   | 447710   | 695530   | 556310   | 427910   | 711040   | 597980   | 604790   | 1049600  | 1251500  | 605930   | 848380   |
| LIPID-N-0161 | LPE(20:4/0:0) | 溶血磷脂酰乙醇胺_LPE(20:4/0:0) | GP      | 甘油磷脂类  | LPE      | 溶血磷脂酰乙醇胺 | C25H44NO7P | 6252900 | 12262000 | 10726000 | 16015000 | 8692700  | 13722000 | 11596000 | 8729400  | 15223000 | 12777000 | 16057000 | 18532000 | 24559000 | 15535000 | 15999000 |
| LIPID-N-0164 | LPE(22:5/0:0) | 溶血磷脂酰乙醇胺_LPE(22:5/0:0) | GP      | 甘油磷脂类  | LPE      | 溶血磷脂酰乙醇胺 | C27H46NO7P | 294660  | 509690   | 1302300  | 446470   | 341050   | 544280   | 472430   | 328930   | 596920   | 533060   | 415700   | 523910   | 477360   | 350330   | 416190   |
| LIPID-N-0165 | LPE(22:6/0:0) | 溶血磷脂酰乙醇胺_LPE(22:6/0:0) | GP      | 甘油磷脂类  | LPE      | 溶血磷脂酰乙醇胺 | C27H44NO7P | 3031000 | 7454500  | 6465200  | 8195000  | 5046200  | 5304300  | 5587000  | 3453400  | 7037000  | 5353600  | 10363000 | 12188000 | 14885000 | 8874900  | 11063000 |
| LIPID-N-0167 | LPG(18:0/0:0) | 溶血磷脂酰甘油_LPG(18:0/0:0)  | GP      | 甘油磷脂类  | LPG      | 溶血磷脂酰甘油  | C24H49O9P  | 37011   | 412430   | 137290   | 392610   | 192460   | 115030   | 51139    | 70948    | 40813    | 102100   | 254750   | 272640   | 288010   | 163130   | 222840   |
| LIPID-N-0169 | LPG(16:1/0:0) | 溶血磷脂酰甘油_LPG(16:1/0:0)  | GP      | 甘油磷脂类  | LPG      | 溶血磷脂酰甘油  | C22H43O9P  | 44249   | 184550   | 90597    | 215170   | 111830   | 82563    | 59770    | 56235    | 52948    | 86830    | 74048    | 77971    | 70124    | 51356    | 64010    |
| LIPID-N-0170 | LPG(18:1/0:0) | 溶血磷脂酰甘油_LPG(18:1/0:0)  | GP      | 甘油磷脂类  | LPG      | 溶血磷脂酰甘油  | C24H47O9P  | 519560  | 769950   | 793120   | 843720   | 533010   | 1114800  | 986960   | 578730   | 1014500  | 918230   | 452460   | 604210   | 761540   | 447540   | 450870   |
| LIPID-N-0172 | LPG(20:4/0:0) | 溶血磷脂酰甘油_LPG(20:4/0:0)  | GP      | 甘油磷脂类  | LPG      | 溶血磷脂酰甘油  | C26H45O9P  | 21464   | 75394    | 84252    | 135480   | 60756    | 68964    | 85630    | 40280    | 97321    | 63685    | 100850   | 114210   | 138190   | 93460    | 90931    |
| LIPID-N-0173 | LPG(22:5/0:0) | 溶血磷脂酰甘油_LPG(22:5/0:0)  | GP      | 甘油磷脂类  | LPG      | 溶血磷脂酰甘油  | C28H47O9P  | 4138.1  | 10924    | 28427    | 12477    | 7280.5   | 10174    | 12797    | 7484.8   | 23487    | 8684.7   | 11325    | 10187    | 16359    | 8681.1   | 8084.4   |
| LIPID-N-0175 | LPI(16:0/0:0) | 溶血磷脂酰肌醇_LPI(16:0/0:0)  | GP      | 甘油磷脂类  | LPI      | 溶血磷脂酰肌醇  | C25H49O12P | 263940  | 282020   | 920090   | 305400   | 118110   | 284660   | 159540   | 227180   | 333640   | 298370   | 878970   | 836960   | 1238500  | 642390   | 908490   |
| LIPID-N-0176 | LPI(18:0/0:0) | 溶血磷脂酰肌醇_LPI(18:0/0:0)  | GP      | 甘油磷脂类  | LPI      | 溶血磷脂酰肌醇  | C27H53O12P | 3534300 | 5499500  | 6655300  | 7864000  | 3436600  | 4393500  | 3194200  | 5170200  | 6116200  | 5707400  | 8734900  | 10674000 | 944000   | 703700   | 856580   |
| LIPID-N-0178 | LPI(18:1/0:0) | 溶血磷脂酰肌醇_LPI(18:1/0:0)  | GP      | 甘油磷脂类  | LPI      | 溶血磷脂酰肌醇  | C27H51O12P | 297870  | 358920   | 657870   | 510390   | 191090   | 367550   | 182960   | 196620   | 244500   | 333150   | 353980   | 732230   | 440750   | 401430   | 449140   |
| LIPID-N-0179 | LPI(18:2/0:0) | 溶血磷脂酰肌醇_LPI(18:2/0:0)  | GP      | 甘油磷脂类  | LPI      | 溶血磷脂酰肌醇  | C27H49O12P | 21254   | 23684    | 51275    | 29140    | 10314    | 23159    | 14705    | 15292    | 38930    | 30685    | 116670   | 139530   | 186230   | 99036    | 137110   |
| LIPID-N-0180 | LPI(20:3/0:0) | 溶血磷脂酰肌醇_LPI(20:3/0:0)  | GP      | 甘油磷脂类  | LPI      | 溶血磷脂酰肌醇  | C29H51O12P | 121660  | 174200   | 248710   | 361640   | 92440    | 152660   | 91721    | 96797    | 197010   | 157040   | 165030   | 292790   | 412780   | 145680   | 220770   |
| LIPID-N-0181 | LPI(20:4/0:0) | 溶血磷脂酰肌醇_LPI(20:4/0:0)  | GP      | 甘油磷脂类  | LPI      | 溶血磷脂酰肌醇  | C29H49O12P | 236200  | 427400   | 570880   | 546530   | 232910   | 463580   | 346830   | 365270   | 562060   | 584700   | 1078000  | 1181800  | 1153900  | 796930   | 764200   |
| LIPID-N-0182 | LPI(22:4/0:0) | 溶血磷脂酰肌醇_LPI(22:4/0:0)  | GP      | 甘油磷脂类  | LPI      | 溶血磷脂酰肌醇  | C31H53O12P | 5178.5  | 7698.3   | 7013     | 11537    | 2120.4   | 6898     | 4211.2   | 5325.7   | 7033.2   | 7919.6   | 15241    | 11788    | 15116    | 6632.6   | 12024    |
| LIPID-N-0187 | LPS(18:0/0:0) | 溶血磷脂酰丝氨酸_LPS(18:0/0:0) | GP      | 甘油磷脂类  | LPS      | 溶血磷脂酰丝氨酸 | C24H48NO9P | 89996   | 531340   | 245300   | 513810   | 238540   | 223520   | 155980   | 235840   | 257490   | 258000   | 577270   | 505170   | 509780   | 543900   | 420870   |
| LIPID-N-0189 | LPS(18:2/0:0) | 溶血磷脂酰丝氨酸_LPS(18:2/0:0) | GP      | 甘油磷脂类  | LPS      | 溶血磷脂酰丝氨酸 | C24H44NO9P | 3830.5  | 8637.2   | 24815    | 9023.9   | 5072.6   | 9217.6   | 7629.5   | 9        | 7603.5   | 7394.1   | 21009    | 24407    | 35884    | 24604    | 17700    |
| LIPID-N-0204 | PC(18:0_12:0) | 磷脂酰胆碱_PC(18:0_12:0)    | GP      | 甘油磷脂类  | PC       | 磷脂酰胆碱    | C38H76NO8P | 5338    | 64336    | 78040    | 74959    | 66125    | 68648    | 54011    | 53686    | 37323    | 53083    | 50564    | 64120    | 54847    | 58658    | 41289    |
| LIPID-N-0206 | PC(16:0_16:0) | 磷脂酰胆碱_PC(16:0_16:0)    | GP      | 甘油磷脂类  | PC       | 磷脂酰胆碱    | C40H80NO8P | 6213600 | 8191300  | 14387000 | 1734400  | 8463600  | 7386000  | 8446100  | 7582600  | 7975000  | 6929000  | 10796000 | 8027000  | 8143800  | 10874000 | 8128900  |
| LIPID-N-0217 | PC(14:0_18:1) | 磷脂酰胆碱_PC(14:0_18:1)    | GP      | 甘油磷脂类  | PC       | 磷脂酰胆碱    | C40H78NO8P | 475990  | 413620   | 369840   | 521550   | 417680   | 482820   | 356160   | 471990   | 387170   | 490660   | 360490   | 397970   | 341860   | 360160   | 334020   |
| LIPID-N-0221 | PC(16:0_20:1) | 磷脂酰胆碱_PC(16:0_20:1)    | GP      | 甘油磷脂类  | PC       | 磷脂酰胆碱    | C44H86NO8P | 229200  | 239960   | 264150   | 265750   | 238830   | 231410   | 197070   | 181540   | 199250   | 167790   | 180830   | 148230   | 150240   | 154470   | 142660   |
| LIPID-N-0222 | PC(19:0_18:1) | 磷脂酰胆碱_PC(19:0_18:1)    | GP      | 甘油磷脂类  | PC       | 磷脂酰胆碱    | C44H88NO8P | 17915   | 17782    | 23920    | 24819    | 24284    | 20401    | 19069    | 22746    | 19864    | 23519    | 16277    | 17234    | 18353    | 15370    | 16218    |
| LIPID-N-0228 | PC(16:1_16:1) | 磷脂酰胆碱_PC(16:1_16:1)    | GP      | 甘油磷脂类  | PC       | 磷脂酰胆碱    | C40H76NO8P | 92250   | 593560   | 580640   | 782460   | 388040   | 272460   | 374340   | 295490   | 338520   | 204820   | 123800   | 202710   | 120330   | 141340   |          |
| LIPID-N-0231 | PC(16:1_18:1) | 磷脂酰胆碱_PC(16:1_18:1)    | GP      | 甘油磷脂类  | PC       | 磷脂酰胆碱    | C42H80NO8P | 386660  | 3268900  | 2694700  | 4221300  | 3908400  | 3437400  | 2432700  | 2970600  | 2374700  | 2854900  | 1414300  | 1120700  | 1777200  | 1463400  | 1236900  |
| LIPID-N-0234 | PC(17:0_18:2) | 磷脂酰胆碱_PC(17:0_18:2)    | GP      | 甘油磷脂类  | PC       | 磷脂酰胆碱    | C43H82NO8P | 896850  | 1038600  | 1288000  | 904100   | 1084700  | 1152500  | 1403000  | 1207700  | 1109200  | 1097300  | 1562900  | 1897500  | 1822900  | 1767100  | 1844000  |
| LIPID-N-0235 | PC(18:1_18:1) | 磷脂酰胆碱_PC(18:1_18:1)    | GP      | 甘油磷脂类  | PC       | 磷脂酰胆碱    | C44H84NO8P | 7796200 | 9742700  | 7344300  | 14904000 | 10515000 | 9678000  | 7744700  | 8076800  | 6594900  | 7455600  | 3664000  | 3785200  | 3892800  | 3676900  | 3391300  |
| LIPID-N-0239 | PC(18:1_20:1) | 磷脂酰胆碱_PC(18:1_20:1)    | GP      | 甘油磷脂类  | PC       | 磷脂酰胆碱    | C46H88NO8P | 356790  | 258880   | 242260   | 553530   | 237460   | 286300   | 221750   | 244280   | 20440    | 200820   | 81198    | 99063    | 80645    | 89176    | 90437    |
| LIPID-N-0240 | PC(18:2_20:0) | 磷脂酰胆碱_PC(18:2_20:0)    | GP      | 甘油磷脂类  | PC       | 磷脂酰胆碱    | C46H88NO8P | 118930  | 62616    | 43898    | 61080    | 70411    | 61399    | 60038    | 64303    | 63065    | 61768    | 293290   | 119350   | 82591    | 290560   | 92274    |
| LIPID-N-0245 | PC(14:1_18:2) | 磷脂酰胆碱_PC(14:1_18:2)    | GP      | 甘油磷脂类  | PC       | 磷脂酰胆碱    | C40H74NO8P | 351930  | 916310   | 1383300  | 734940   | 849690   | 1399100  | 1250500  | 601910   | 1366500  | 926380   | 855180   | 1237800  | 1853500  | 979310   | 982910   |
| LIPID-N-0250 | PC(16:1_18:2) | 磷脂酰胆碱_PC(16:1_18:2)    | GP      | 甘油磷脂类  | PC       | 磷脂酰胆碱    | C42H78NO8P | 226500  | 1891900  | 2710400  | 1889400  | 2401500  | 2546400  | 2204000  | 2938100  | 2853400  | 2423500  | 2469400  | 2672800  | 3930500  | 2296900  | 2887700  |
| LIPID-N-0254 | PC(18:1_18:2) | 磷脂酰胆碱_PC(18:1_18:2)    | GP      | 甘油磷脂类  | PC       | 磷脂酰胆碱    | C44H82NO8P | 726800  | 7989200  | 6249000  | 753800   | 7336800  | 6704400  | 6853500  | 7661100  | 7834400  | 7371000  | 6982200  | 6790000  | 9218000  | 7452700  | 7703100  |
| LIPID-N-0257 | PC(19:1_18:2) | 磷脂酰胆碱_PC(19:1_18:2)    | GP      | 甘油磷脂类  | PC       | 磷脂酰胆碱    | C44H84NO8P | 318130  | 333490   | 285980   | 344660   | 413640   | 335190   | 458420   | 327230   | 413680   | 251420   | 320450   | 342270   | 445530   | 315500   | 332060   |
| LIPID-N-0259 | PC(20:1_18:2) | 磷脂酰胆碱_PC(20:1_18:2)    | GP      | 甘油磷脂类  | PC       | 磷脂酰胆碱    | C46H86NO8P | 577610  | 299980   | 256260   | 436020   | 350040   | 471950   | 386900   | 376990   | 352900   | 329710   | 223950   | 256400   | 249360   | 252790   | 305300   |
| LIPID-N-0260 | PC(20:2_18:1) | 磷脂酰胆碱_PC(20:2_18:1)    | GP      | 甘油磷脂类  | PC       | 磷脂酰胆碱    | C46H86NO8P | 226750  | 242920   | 141010   | 332810   | 222240   | 214730   | 177470   | 171010   | 169950   | 144500   | 83373    | 105780   | 93720    | 88234    | 82249    |
| LIPID-N-0263 | PC(20:0_20:3) | 磷脂酰胆碱_PC(20:0_20:3)    | GP      | 甘油磷脂类  | PC       | 磷脂酰胆碱    | C48H90NO8P | 32536   | 18346    | 7813.4   | 28578    | 17220    | 21291    | 9289.4   | 17646    | 12121    | 16198    | 25557    | 18995    | 10965    | 28876    | 17777    |
| LIPID-N-0266 | PC(16:1_18:3) | 磷脂酰胆碱_PC(16:1_18:3)    | GP      | 甘油磷脂类  | PC       | 磷脂酰胆碱    | C42H76NO8P | 35025   | 57800    | 83364    | 41312    | 58780    | 21916    | 31792    | 52820    | 35786    | 45561    | 36276    | 47366    | 49263    | 42914    | 46498    |
| LIPID-N-0267 | PC(16:2_18:2) | 磷脂酰胆碱_PC(16:2_18:2)    | GP      | 甘油磷脂类  | PC       | 磷脂酰胆碱    | C42H76NO8P | 36024   | 50452    | 64425    | 25001    | 44835    | 61482    | 84700    | 64485    | 80833    | 67442    | 80862    | 88383    | 158600   | 110520   | 109530   |
| LIPID-N-0270 | PC(18:2_18:2) | 磷脂酰胆碱_PC(18:2_18:2)    | GP      | 甘油磷脂类  | PC       | 磷脂酰胆碱    | C44H80NO8P | 3002800 | 1809500  | 1582700  | 1542100  | 1938700  | 1624300  | 2448100  | 1746200  | 2809200  | 1821900  | 2901800  | 4251400  | 4814400  | 2845700  | 3741700  |
| LIPID-N-0271 | PC(18:3_18:1) | 磷脂酰胆碱_PC(18:3_18:1)    | GP      | 甘油磷脂类  | PC       | 磷脂酰胆碱    | C44H80NO8P | 162710  | 231540   | 202800   | 238600   | 190950   | 171690   | 187540   | 215760   | 192710   | 157260   | 142150   | 135510   | 192200   | 154620   | 158660   |
| LIPID-N-0274 | PC(20:3_18:1) |                        |         |        |          |          |            |         |          |          |          |          |          |          |          |          |          |          |          |          |          |          |



| Index        | Compounds      | 物质                    | Class I | 物质一級分类 | Class II | 物质二級分类 | Formula    | ND1      | ND2      | ND3      | ND4      | ND5      | HFD1     | HFD2     | HFD3     | HFD4     | HFD5     | AST-H1   | AST-H2   | AST-H3   | AST-H4   | AST-H5    |
|--------------|----------------|-----------------------|---------|--------|----------|--------|------------|----------|----------|----------|----------|----------|----------|----------|----------|----------|----------|----------|----------|----------|----------|-----------|
| LIPID-N-0335 | PE(16:1, 18:0) | 磷脂酰乙醇胺 PE(16:1, 18:0) | GP      | 甘油磷脂类  | PE       | 磷脂酰乙醇胺 | C39H76NO8P | 63434    | 70668    | 76668    | 61125    | 68783    | 58143    | 46198    | 66835    | 50408    | 58047    | 38658    | 30855    | 33916    | 49557    | 32981     |
| LIPID-N-0337 | PE(20:1, 16:0) | 磷脂酰乙醇胺 PE(20:1, 16:0) | GP      | 甘油磷脂类  | PE       | 磷脂酰乙醇胺 | C41H80NO8P | 100020   | 108340   | 180340   | 170430   | 88505    | 134370   | 96854    | 119780   | 123110   | 104270   | 84357    | 106830   | 98733    | 95029    | 100310    |
| LIPID-N-0338 | PE(18:1, 18:0) | 磷脂酰乙醇胺 PE(18:1, 18:0) | GP      | 甘油磷脂类  | PE       | 磷脂酰乙醇胺 | C41H80NO8P | 124700   | 1700500  | 3494800  | 2138800  | 1343400  | 1503300  | 1209900  | 1505600  | 1474000  | 1466800  | 1224900  | 1365700  | 1466200  | 1128300  | 1362600   |
| LIPID-N-0339 | PE(20:1, 18:0) | 磷脂酰乙醇胺 PE(20:1, 18:0) | GP      | 甘油磷脂类  | PE       | 磷脂酰乙醇胺 | C43H84NO8P | 514670   | 58532    | 88562    | 137870   | 48999    | 86400    | 81562    | 84532    | 110130   | 84945    | 63992    | 90482    | 83086    | 65672    | 76583     |
| LIPID-N-0340 | PE(20:0, 18:1) | 磷脂酰乙醇胺 PE(20:0, 18:1) | GP      | 甘油磷脂类  | PE       | 磷脂酰乙醇胺 | C43H84NO8P | 10708    | 86324    | 32913    | 26728    | 69795    | 11554    | 15019    | 90989    | 91689    | 11972    | 92208    | 16317    | 14391    | 11541    | 16904     |
| LIPID-N-0345 | PE(24:0, 18:1) | 磷脂酰乙醇胺 PE(24:0, 18:1) | GP      | 甘油磷脂类  | PE       | 磷脂酰乙醇胺 | C47H92NO8P | 9        | 2821     | 15511    | 9        | 9        | 9        | 3673     | 9        | 2786     | 9        | 2908     | 1        | 42587    | 31764    | 9         |
| LIPID-N-0347 | PE(16:1, 16:1) | 磷脂酰乙醇胺 PE(16:1, 16:1) | GP      | 甘油磷脂类  | PE       | 磷脂酰乙醇胺 | C37H70NO8P | 84578    | 55804    | 116720   | 62663    | 83537    | 50581    | 37930    | 54015    | 34932    | 39640    | 17007    | 25276    | 17796    | 24818    | 12533     |
| LIPID-N-0350 | PE(18:2, 16:0) | 磷脂酰乙醇胺 PE(18:2, 16:0) | GP      | 甘油磷脂类  | PE       | 磷脂酰乙醇胺 | C39H74NO8P | 12195000 | 12131000 | 20569000 | 11028000 | 12314000 | 13546000 | 10894000 | 13903000 | 13456000 | 14723000 | 22530000 | 22948000 | 23115000 | 18616000 | 229010000 |
| LIPID-N-0352 | PE(18:1, 18:1) | 磷脂酰乙醇胺 PE(18:1, 18:1) | GP      | 甘油磷脂类  | PE       | 磷脂酰乙醇胺 | C41H78NO8P | 2656000  | 3755900  | 9068600  | 4898600  | 3448200  | 3445100  | 2689100  | 3082400  | 2944100  | 2858000  | 2075300  | 2534900  | 2836800  | 2025400  | 2347700   |
| LIPID-N-0353 | PE(18:0, 18:2) | 磷脂酰乙醇胺 PE(18:0, 18:2) | GP      | 甘油磷脂类  | PE       | 磷脂酰乙醇胺 | C41H78NO8P | 6057600  | 5694600  | 7068400  | 5664900  | 4667400  | 5234800  | 5264600  | 6912300  | 6181100  | 6424200  | 9039400  | 13894000 | 11696000 | 9866400  | 12788000  |
| LIPID-N-0354 | PE(20:2, 16:0) | 磷脂酰乙醇胺 PE(20:2, 16:0) | GP      | 甘油磷脂类  | PE       | 磷脂酰乙醇胺 | C41H78NO8P | 122190   | 104420   | 352970   | 141160   | 105740   | 174850   | 137440   | 148880   | 177180   | 150040   | 215750   | 285810   | 235470   | 199280   | 241070    |
| LIPID-N-0355 | PE(19:0, 18:2) | 磷脂酰乙醇胺 PE(19:0, 18:2) | GP      | 甘油磷脂类  | PE       | 磷脂酰乙醇胺 | C42H80NO8P | 32530    | 15290    | 73665    | 18792    | 27396    | 23927    | 34318    | 31067    | 42335    | 42671    | 80551    | 117260   | 95246    | 80282    | 106180    |
| LIPID-N-0356 | PE(20:2, 18:0) | 磷脂酰乙醇胺 PE(20:2, 18:0) | GP      | 甘油磷脂类  | PE       | 磷脂酰乙醇胺 | C43H82NO8P | 25220    | 23212    | 80429    | 46918    | 21741    | 42609    | 47425    | 51770    | 60667    | 41873    | 63715    | 91689    | 78607    | 52285    | 70341     |
| LIPID-N-0357 | PE(20:0, 18:2) | 磷脂酰乙醇胺 PE(20:0, 18:2) | GP      | 甘油磷脂类  | PE       | 磷脂酰乙醇胺 | C43H82NO8P | 45836    | 18696    | 29446    | 25955    | 19422    | 19110    | 13058    | 19102    | 18324    | 19884    | 36241    | 71091    | 53969    | 40638    | 64190     |
| LIPID-N-0358 | PE(20:1, 18:1) | 磷脂酰乙醇胺 PE(20:1, 18:1) | GP      | 甘油磷脂类  | PE       | 磷脂酰乙醇胺 | C43H82NO8P | 274630   | 222660   | 386110   | 510800   | 216400   | 302790   | 250590   | 245740   | 316410   | 240980   | 147130   | 214230   | 207110   | 169780   | 166330    |
| LIPID-N-0361 | PE(20:1, 20:1) | 磷脂酰乙醇胺 PE(20:1, 20:1) | GP      | 甘油磷脂类  | PE       | 磷脂酰乙醇胺 | C45H86NO8P | 69819    | 49451    | 12841    | 18006    | 9        | 81468    | 9        | 7022     | 74333    | 48112    | 9        | 9        | 4570     | 9        | 54836     |
| LIPID-N-0362 | PE(18:1, 22:1) | 磷脂酰乙醇胺 PE(18:1, 22:1) | GP      | 甘油磷脂类  | PE       | 磷脂酰乙醇胺 | C45H86NO8P | 28595    | 47086    | 45310    | 41740    | 31548    | 31976    | 28895    | 29163    | 31482    | 36196    | 26107    | 30940    | 35731    | 27985    | 26430     |
| LIPID-N-0365 | PE(18:3, 16:0) | 磷脂酰乙醇胺 PE(18:3, 16:0) | GP      | 甘油磷脂类  | PE       | 磷脂酰乙醇胺 | C39H72NO8P | 249650   | 41000    | 710190   | 322900   | 489900   | 430660   | 433580   | 528570   | 529870   | 551590   | 512310   | 744260   | 800030   | 691190   | 676840    |
| LIPID-N-0366 | PE(16:1, 18:2) | 磷脂酰乙醇胺 PE(16:1, 18:2) | GP      | 甘油磷脂类  | PE       | 磷脂酰乙醇胺 | C39H72NO8P | 1045700  | 903710   | 1210000  | 607780   | 754940   | 666530   | 633520   | 729030   | 785860   | 743640   | 928520   | 970570   | 1073300  | 1042500  | 1061800   |
| LIPID-N-0367 | PE(17:1, 18:2) | 磷脂酰乙醇胺 PE(17:1, 18:2) | GP      | 甘油磷脂类  | PE       | 磷脂酰乙醇胺 | C40H74NO8P | 180560   | 248350   | 317860   | 149370   | 127290   | 122670   | 105260   | 131050   | 108050   | 414060   | 362980   | 485050   | 281980   | 241850   |           |
| LIPID-N-0368 | PE(18:1, 18:2) | 磷脂酰乙醇胺 PE(18:1, 18:2) | GP      | 甘油磷脂类  | PE       | 磷脂酰乙醇胺 | C41H76NO8P | 1398500  | 1072700  | 1247000  | 1080800  | 1081100  | 983900   | 905700   | 1139900  | 1108800  | 999680   | 1345400  | 1833200  | 1799800  | 1217800  | 1538000   |
| LIPID-N-0369 | PE(16:0, 20:3) | 磷脂酰乙醇胺 PE(16:0, 20:3) | GP      | 甘油磷脂类  | PE       | 磷脂酰乙醇胺 | C41H76NO8P | 934710   | 703270   | 750240   | 173510   | 717630   | 787310   | 539490   | 733610   | 455760   | 732300   | 647430   | 826260   | 623820   | 694110   | 715940    |
| LIPID-N-0371 | PE(17:0, 20:3) | 磷脂酰乙醇胺 PE(17:0, 20:3) | GP      | 甘油磷脂类  | PE       | 磷脂酰乙醇胺 | C42H78NO8P | 25502    | 32971    | 38387    | 29317    | 52871    | 66875    | 45520    | 46530    | 44977    | 53420    | 76545    | 66420    | 51678    | 78646    | 86813     |
| LIPID-N-0372 | PE(20:3, 18:0) | 磷脂酰乙醇胺 PE(20:3, 18:0) | GP      | 甘油磷脂类  | PE       | 磷脂酰乙醇胺 | C43H80NO8P | 712750   | 775470   | 1088400  | 709750   | 886660   | 675370   | 1065600  | 774960   | 778080   | 775250   | 1182800  | 990530   | 810020   | 1138400  |           |
| LIPID-N-0373 | PE(20:1, 18:2) | 磷脂酰乙醇胺 PE(20:1, 18:2) | GP      | 甘油磷脂类  | PE       | 磷脂酰乙醇胺 | C43H80NO8P | 270590   | 177470   | 253750   | 258780   | 180830   | 206670   | 167970   | 210350   | 193920   | 196460   | 191430   | 302030   | 270280   | 193900   | 286280    |
| LIPID-N-0381 | PE(18:3, 16:1) | 磷脂酰乙醇胺 PE(18:3, 16:1) | GP      | 甘油磷脂类  | PE       | 磷脂酰乙醇胺 | C39H70NO8P | 21583    | 23671    | 45983    | 13535    | 15301    | 22957    | 20401    | 24087    | 18400    | 23303    | 22294    | 26425    | 28675    | 29682    | 23256     |
| LIPID-N-0382 | PE(18:2, 18:2) | 磷脂酰乙醇胺 PE(18:2, 18:2) | GP      | 甘油磷脂类  | PE       | 磷脂酰乙醇胺 | C41H74NO8P | 1136000  | 698740   | 848200   | 554960   | 764150   | 772830   | 1137400  | 1057000  | 1227300  | 932220   | 2398400  | 3388100  | 4085800  | 2233000  | 3026500   |
| LIPID-N-0383 | PE(16:0, 20:4) | 磷脂酰乙醇胺 PE(16:0, 20:4) | GP      | 甘油磷脂类  | PE       | 磷脂酰乙醇胺 | C41H74NO8P | 54523000 | 56929000 | 61674000 | 49592000 | 66208000 | 58049000 | 47533000 | 53815000 | 52785000 | 54394000 | 63145000 | 49477000 | 55132000 | 64771000 | 52199000  |
| LIPID-N-0384 | PE(18:3, 18:1) | 磷脂酰乙醇胺 PE(18:3, 18:1) | GP      | 甘油磷脂类  | PE       | 磷脂酰乙醇胺 | C41H74NO8P | 283190   | 316660   | 397420   | 250130   | 314260   | 273080   | 314440   | 310520   | 307390   | 275250   | 323160   | 350160   | 457380   | 352490   | 401270    |
| LIPID-N-0386 | PE(17:0, 20:4) | 磷脂酰乙醇胺 PE(17:0, 20:4) | GP      | 甘油磷脂类  | PE       | 磷脂酰乙醇胺 | C42H76NO8P | 885920   | 804260   | 1177900  | 838900   | 1087900  | 1052700  | 1201300  | 1395400  | 1409800  | 1380700  | 2207400  | 1894100  | 1706600  | 2063100  | 1778500   |
| LIPID-N-0387 | PE(20:4, 18:0) | 磷脂酰乙醇胺 PE(20:4, 18:0) | GP      | 甘油磷脂类  | PE       | 磷脂酰乙醇胺 | C43H78NO8P | 2354400  | 3377900  | 18456000 | 30142000 | 28347000 | 28504000 | 27202000 | 32851000 | 34866000 | 29822000 | 40224000 | 37148000 | 39234000 | 34865000 | 34189000  |
| LIPID-N-0388 | PE(18:1, 20:3) | 磷脂酰乙醇胺 PE(18:1, 20:3) | GP      | 甘油磷脂类  | PE       | 磷脂酰乙醇胺 | C43H78NO8P | 2711600  | 2245500  | 1510300  | 3106100  | 2163800  | 2527400  | 1729300  | 2114200  | 1784000  | 2042500  | 1403800  | 2354000  | 1811600  | 1675600  | 2018000   |
| LIPID-N-0389 | PE(16:0, 22:4) | 磷脂酰乙醇胺 PE(16:0, 22:4) | GP      | 甘油磷脂类  | PE       | 磷脂酰乙醇胺 | C43H78NO8P | 860890   | 1272900  | 2259900  | 967530   | 1177400  | 1470600  | 1072900  | 1368000  | 1391500  | 1511400  | 1474400  | 1121000  | 1120100  | 1328100  | 1426900   |
| LIPID-N-0392 | PE(18:0, 22:4) | 磷脂酰乙醇胺 PE(18:0, 22:4) | GP      | 甘油磷脂类  | PE       | 磷脂酰乙醇胺 | C45H82NO8P | 404390   | 457350   | 1115400  | 513800   | 442810   | 543030   | 487100   | 716310   | 656480   | 705980   | 1081100  | 803240   | 827170   | 961660   | 827070    |
| LIPID-N-0394 | PE(20:4, 20:0) | 磷脂酰乙醇胺 PE(20:4, 20:0) | GP      | 甘油磷脂类  | PE       | 磷脂酰乙醇胺 | C45H82NO8P | 94515    | 62345    | 28216    | 68427    | 53719    | 57494    | 38812    | 67829    | 50446    | 64700    | 74623    | 103280   | 96790    | 80807    | 97194     |
| LIPID-N-0397 | PE(16:0, 20:5) | 磷脂酰乙醇胺 PE(16:0, 20:5) | GP      | 甘油磷脂类  | PE       | 磷脂酰乙醇胺 | C41H72NO8P | 532030   | 353480   | 239420   | 272210   | 328320   | 204600   | 194800   | 291710   | 256340   | 261420   | 356340   | 356620   | 325110   | 358120   | 369770    |
| LIPID-N-0399 | PE(18:1, 20:4) | 磷脂酰乙醇胺 PE(18:1, 20:4) | GP      | 甘油磷脂类  | PE       | 磷脂酰乙醇胺 | C43H76NO8P | 2908300  | 347800   | 3499100  | 299100   | 4435500  | 3319600  | 3352200  | 3264100  | 3750500  | 3241300  | 3025400  | 2933200  | 3351300  | 3086700  | 3290700   |
| LIPID-N-0400 | PE(18:0, 20:5) | 磷脂酰乙醇胺 PE(18:0, 20:5) | GP      | 甘油磷脂类  | PE       | 磷脂酰乙醇胺 | C43H76NO8P | 559680   | 530400   | 240000   | 608510   | 466520   | 278390   | 292400   | 451950   | 417910   | 318840   | 500960   | 555640   | 489170   | 497270   | 502230    |
| LIPID-N-0401 | PE(16:0, 22:5) | 磷脂酰乙醇胺 PE(16:0, 22:5) | GP      | 甘油磷脂类  | PE       | 磷脂酰乙醇胺 | C43H76NO8P | 1957700  | 2902700  | 1963300  | 3073700  | 3263700  | 2765500  | 3305300  | 3764400  | 3610200  | 1859600  | 2297400  | 1829800  | 2378500  | 1744200  |           |
| LIPID-N-0409 | PE(20:5, 16:1) | 磷脂酰乙醇胺 PE(20:5, 16:1) | GP      | 甘油磷脂类  | PE       | 磷脂酰乙醇胺 | C41H70NO8P | 29673    | 24755    | 16973    | 89091    | 23824    | 11615    | 77587    | 10684    | 96824    | 60426    | 12069    | 78826    | 84908    | 54014    | 11748     |
| LIPID-N-0413 | PE(22:6, 16:0) | 磷脂酰乙醇胺 PE(22:6, 16:0) | GP      | 甘油磷脂类  | PE       | 磷脂酰乙醇胺 | C43H74NO8P | 33514000 | 50710000 | 48540000 | 47115000 | 61256000 | 44870000 | 59155000 | 50319000 | 40504000 | 55415000 | 61455000 | 53619000 | 55167000 | 60627000 | 50728000  |
| LIPID-N-0415 | PE(22:6, 18:0) | 磷脂酰乙醇胺 PE(22:6, 18:0) | GP      | 甘油磷脂类  | PE       | 磷脂酰乙醇胺 | C45H78NO8P | 14579000 | 20587000 | 20464000 | 24100000 | 23292000 | 23439000 | 20633000 | 25039000 | 25820000 | 25733000 | 26202000 | 34058000 | 26198000 | 29680000 | 31501000  |
| LIPID-N-0417 | PE(18:1, 22:5) | 磷脂酰乙醇胺 PE(18:1, 22:5  |         |        |          |        |            |          |          |          |          |          |          |          |          |          |          |          |          |          |          |           |

| Index        | Compounds      | 物质                    | Class I | 物质一级分类 | Class II | 物质二级分类 | Formula     | ND1      | ND2     | ND3     | ND4     | ND5     | HF1D1   | HF1D2   | HF1D3   | HF1D4   | HF1D5   | AST-H1  | AST-H2  | AST-H3  | AST-H4  | AST-H5  |       |
|--------------|----------------|-----------------------|---------|--------|----------|--------|-------------|----------|---------|---------|---------|---------|---------|---------|---------|---------|---------|---------|---------|---------|---------|---------|-------|
| LIPID-N-0463 | PG(18:1, 22:5) | 磷脂酰甘油_PG(18:1, 22:5)  | GP      | 甘油磷脂类  | PG       | 磷脂酰甘油  | C46H79O10P  | 123610   | 274860  | 959810  | 236410  | 286960  | 344700  | 294730  | 172500  | 309780  | 272750  | 965890  | 892220  | 126270  | 106680  | 76280   |       |
| LIPID-N-0464 | PG(16:1, 22:6) | 磷脂酰甘油_PG(16:1, 22:6)  | GP      | 甘油磷脂类  | PG       | 磷脂酰甘油  | C44H73O10P  | 83490    | 174720  | 222530  | 248100  | 156630  | 114800  | 95506   | 37663   | 69899   | 141230  | 39856   | 38359   | 81758   | 37246   | 53520   |       |
| LIPID-N-0465 | PG(18:1, 22:6) | 磷脂酰甘油_PG(18:1, 22:6)  | GP      | 甘油磷脂类  | PG       | 磷脂酰甘油  | C46H77O10P  | 40897    | 115380  | 140450  | 207740  | 854230  | 108770  | 957710  | 378790  | 92900   | 547570  | 347230  | 521290  | 738570  | 385430  | 44390   |       |
| LIPID-N-0466 | PG(18:2, 22:6) | 磷脂酰甘油_PG(18:2, 22:6)  | GP      | 甘油磷脂类  | PG       | 磷脂酰甘油  | C46H75O10P  | 80374    | 191400  | 345030  | 224100  | 179380  | 203700  | 272660  | 111010  | 253450  | 174960  | 216870  | 355130  | 537660  | 217360  | 337620  |       |
| LIPID-N-0467 | PG(20:2, 22:6) | 磷脂酰甘油_PG(20:2, 22:6)  | GP      | 甘油磷脂类  | PG       | 磷脂酰甘油  | C48H79O10P  | 67708    | 132980  | 188760  | 195130  | 135550  | 121400  | 98783   | 49987   | 79259   | 65992   | 32979   | 51304   | 56610   | 25050   | 33076   |       |
| LIPID-N-0468 | PG(20:3, 22:6) | 磷脂酰甘油_PG(20:3, 22:6)  | GP      | 甘油磷脂类  | PG       | 磷脂酰甘油  | C48H77O10P  | 26167    | 64672   | 125310  | 86529   | 51091   | 61625   | 54678   | 22716   | 50316   | 42150   | 19436   | 37296   | 36770   | 29146   | 28021   |       |
| LIPID-N-0469 | PI(16:0, 18:0) | 磷脂酰肌醇_PI(16:0, 18:0)  | GP      | 甘油磷脂类  | PI       | 磷脂酰肌醇  | C43H83O13P  | 10575    | 38520   | 15488   | 30026   | 23078   | 11344   | 8588.4  | 13495   | 19175   | 11304   | 46791   | 26958   | 30374   | 35581   | 14987   |       |
| LIPID-N-0474 | PI(15:0, 16:1) | 磷脂酰肌醇_PI(15:0, 16:1)  | GP      | 甘油磷脂类  | PI       | 磷脂酰肌醇  | C40H75O13P  | 46681    | 70979   | 334310  | 58963   | 67965   | 81738   | 64559   | 30464   | 61054   | 54606   | 14005   | 15658   | 20891   | 15930   | 7923.7  |       |
| LIPID-N-0475 | PI(16:0, 16:1) | 磷脂酰肌醇_PI(16:0, 16:1)  | GP      | 甘油磷脂类  | PI       | 磷脂酰肌醇  | C41H77O13P  | 39635    | 90415   | 175400  | 111050  | 101410  | 78842   | 73679   | 94160   | 155420  | 86693   | 170250  | 132000  | 164170  | 184290  | 139410  |       |
| LIPID-N-0477 | PI(16:0, 18:1) | 磷脂酰肌醇_PI(16:0, 18:1)  | GP      | 甘油磷脂类  | PI       | 磷脂酰肌醇  | C43H81O13P  | 81235    | 111890  | 463090  | 150070  | 130780  | 155300  | 134240  | 160930  | 173900  | 175730  | 155370  | 231020  | 197480  | 181560  | 219890  |       |
| LIPID-N-0480 | PI(17:0, 18:1) | 磷脂酰肌醇_PI(17:0, 18:1)  | GP      | 甘油磷脂类  | PI       | 磷脂酰肌醇  | C44H83O13P  | 341470   | 394340  | 243640  | 379670  | 285230  | 362640  | 276760  | 334390  | 469600  | 415050  | 316460  | 330120  | 292860  | 303890  | 351950  |       |
| LIPID-N-0482 | PI(18:0, 18:1) | 磷脂酰肌醇_PI(18:0, 18:1)  | GP      | 甘油磷脂类  | PI       | 磷脂酰肌醇  | C45H85O13P  | 111580   | 71905   | 171230  | 128490  | 70780   | 120570  | 84738   | 104690  | 106870  | 84217   | 88476   | 145990  | 105820  | 84459   | 89975   |       |
| LIPID-N-0490 | PI(18:2, 16:0) | 磷脂酰肌醇_PI(18:2, 16:0)  | GP      | 甘油磷脂类  | PI       | 磷脂酰肌醇  | C43H79O13P  | 85695    | 81148   | 251890  | 63443   | 50904   | 109130  | 154880  | 151830  | 258400  | 211850  | 562240  | 779510  | 733370  | 559780  | 626440  |       |
| LIPID-N-0491 | PI(16:1, 18:1) | 磷脂酰肌醇_PI(16:1, 18:1)  | GP      | 甘油磷脂类  | PI       | 磷脂酰肌醇  | C43H79O13P  | 17469    | 32118   | 50010   | 43825   | 24909   | 30364   | 23786   | 26946   | 22550   | 28283   | 22684   | 26062   | 24291   | 40563   | 25276   |       |
| LIPID-N-0493 | PI(17:1, 18:1) | 磷脂酰肌醇_PI(17:1, 18:1)  | GP      | 甘油磷脂类  | PI       | 磷脂酰肌醇  | C44H81O13P  | 80290    | 58373   | 68419   | 72370   | 104800  | 89569   | 99968   | 111480  | 107150  | 91003   | 67865   | 81638   | 126090  | 81362   | 82374   |       |
| LIPID-N-0494 | PI(17:0, 18:2) | 磷脂酰肌醇_PI(17:0, 18:2)  | GP      | 甘油磷脂类  | PI       | 磷脂酰肌醇  | C44H81O13P  | 37530    | 22752   | 42480   | 36263   | 29667   | 60208   | 57745   | 35487   | 90787   | 54178   | 162750  | 198270  | 218210  | 123100  | 116640  |       |
| LIPID-N-0495 | PI(18:0, 18:2) | 磷脂酰肌醇_PI(18:0, 18:2)  | GP      | 甘油磷脂类  | PI       | 磷脂酰肌醇  | C45H83O13P  | 427760   | 297540  | 913220  | 342310  | 216150  | 384980  | 423670  | 603480  | 806370  | 612890  | 1237600 | 1929700 | 2353700 | 1069900 | 1431500 |       |
| LIPID-N-0496 | PI(18:1, 18:1) | 磷脂酰肌醇_PI(18:1, 18:1)  | GP      | 甘油磷脂类  | PI       | 磷脂酰肌醇  | C45H83O13P  | 180550   | 252530  | 507100  | 320180  | 223590  | 199640  | 104240  | 267500  | 229150  | 316300  | 337360  | 271830  | 276370  | 346150  | 346150  |       |
| LIPID-N-0499 | PI(18:0, 19:2) | 磷脂酰肌醇_PI(18:0, 19:2)  | GP      | 甘油磷脂类  | PI       | 磷脂酰肌醇  | C46H85O13P  | 75355    | 95391   | 97899   | 93925   | 98499   | 65242   | 125190  | 109920  | 126810  | 137260  | 167520  | 205100  | 210470  | 199170  | 205570  |       |
| LIPID-N-0502 | PI(18:0, 20:2) | 磷脂酰肌醇_PI(18:0, 20:2)  | GP      | 甘油磷脂类  | PI       | 磷脂酰肌醇  | C47H87O13P  | 49283    | 105370  | 149650  | 199710  | 95345   | 78739   | 61428   | 82290   | 129430  | 87748   | 37608   | 40622   | 31555   | 42372   | 38445   |       |
| LIPID-N-0504 | PI(18:0, 22:2) | 磷脂酰肌醇_PI(18:0, 22:2)  | GP      | 甘油磷脂类  | PI       | 磷脂酰肌醇  | C49H91O13P  | 16119    | 21669   | 19112   | 26389   | 18696   | 19513   | 19504   | 21958   | 18094   | 25241   | 17743   | 27651   | 27206   | 19404   | 23560   |       |
| LIPID-N-0508 | PI(18:1, 18:2) | 磷脂酰肌醇_PI(18:1, 18:2)  | GP      | 甘油磷脂类  | PI       | 磷脂酰肌醇  | C45H81O13P  | 181660   | 152110  | 323490  | 162580  | 135610  | 150200  | 181710  | 237520  | 258030  | 229270  | 637020  | 744530  | 736480  | 57560   | 591400  |       |
| LIPID-N-0509 | PI(16:0, 20:3) | 磷脂酰肌醇_PI(16:0, 20:3)  | GP      | 甘油磷脂类  | PI       | 磷脂酰肌醇  | C45H81O13P  | 83840    | 70965   | 214090  | 80822   | 64694   | 43441   | 22787   | 58613   | 67483   | 75809   | 30447   | 9       | 33376   | 33561   | 9       |       |
| LIPID-N-0511 | PI(17:0, 20:3) | 磷脂酰肌醇_PI(17:0, 20:3)  | GP      | 甘油磷脂类  | PI       | 磷脂酰肌醇  | C46H83O13P  | 66342    | 11362   | 37060   | 10440   | 12034   | 8872.6  | 11364   | 22648   | 25866   | 12041   | 15527   | 13591   | 23998   | 20243   | 17057   |       |
| LIPID-N-0512 | PI(18:1, 19:2) | 磷脂酰肌醇_PI(18:1, 19:2)  | GP      | 甘油磷脂类  | PI       | 磷脂酰肌醇  | C46H83O13P  | 72994    | 65826   | 61530   | 80761   | 70355   | 87899   | 68463   | 110590  | 86693   | 110070  | 136750  | 148960  | 200290  | 118770  | 133990  |       |
| LIPID-N-0514 | PI(20:3, 18:0) | 磷脂酰肌醇_PI(20:3, 18:0)  | GP      | 甘油磷脂类  | PI       | 磷脂酰肌醇  | C47H85O13P  | 630460   | 434300  | 544580  | 975940  | 332890  | 694190  | 439480  | 800170  | 969550  | 856880  | 743270  | 1159900 | 1075700 | 70000   | 110660  |       |
| LIPID-N-0520 | PI(15:0, 20:4) | 磷脂酰肌醇_PI(15:0, 20:4)  | GP      | 甘油磷脂类  | PI       | 磷脂酰肌醇  | C44H77O13P  | 5896.1   | 9       | 66895   | 8576.1  | 14888   | 14468   | 13132   | 9108.6  | 8043.3  | 23611   | 7525.9  | 8063.8  | 6678.8  | 5907.7  | 4825.8  |       |
| LIPID-N-0522 | PI(16:0, 20:4) | 磷脂酰肌醇_PI(16:0, 20:4)  | GP      | 甘油磷脂类  | PI       | 磷脂酰肌醇  | C45H79O13P  | 448500   | 392770  | 1149300 | 433650  | 303080  | 468270  | 397860  | 633270  | 881460  | 715490  | 1340500 | 1447700 | 1204400 | 1403800 | 1408100 |       |
| LIPID-N-0523 | PI(17:0, 20:4) | 磷脂酰肌醇_PI(17:0, 20:4)  | GP      | 甘油磷脂类  | PI       | 磷脂酰肌醇  | C46H81O13P  | 62923    | 55584   | 226710  | 57702   | 62909   | 107360  | 75462   | 160720  | 203730  | 130420  | 393380  | 376590  | 331280  | 339840  | 396020  |       |
| LIPID-N-0524 | PI(18:0, 20:4) | 磷脂酰肌醇_PI(18:0, 20:4)  | GP      | 甘油磷脂类  | PI       | 磷脂酰肌醇  | C47H83O13P  | 7345900  | 1165700 | 1025300 | 1261100 | 855470  | 1263100 | 1097200 | 1889800 | 2100400 | 1419000 | 2527200 | 2638400 | 2743300 | 2562000 | 2591500 |       |
| LIPID-N-0525 | PI(20:3, 18:1) | 磷脂酰肌醇_PI(20:3, 18:1)  | GP      | 甘油磷脂类  | PI       | 磷脂酰肌醇  | C47H83O13P  | 220570   | 234620  | 405940  | 309190  | 130920  | 201230  | 131280  | 159480  | 181960  | 184890  | 150440  | 209880  | 141100  | 128110  | 176870  |       |
| LIPID-N-0529 | PI(18:0, 22:4) | 磷脂酰肌醇_PI(18:0, 22:4)  | GP      | 甘油磷脂类  | PI       | 磷脂酰肌醇  | C49H87O13P  | 41238    | 65466   | 70469   | 101270  | 59383   | 80448   | 51628   | 94411   | 107610  | 64316   | 93642   | 79907   | 103040  | 92875   |         |       |
| LIPID-N-0532 | PI(18:2, 18:3) | 磷脂酰肌醇_PI(18:2, 18:3)  | GP      | 甘油磷脂类  | PI       | 磷脂酰肌醇  | C45H77O13P  | 46866    | 28191   | 26673   | 31067   | 40490   | 32538   | 26486   | 33762   | 47014   | 48994   | 92096   | 93109   | 76493   | 83920   | 77319   |       |
| LIPID-N-0533 | PI(20:4, 16:1) | 磷脂酰肌醇_PI(20:4, 16:1)  | GP      | 甘油磷脂类  | PI       | 磷脂酰肌醇  | C45H77O13P  | 28952    | 29994   | 16404   | 25216   | 29998   | 21316   | 23216   | 29054   | 30451   | 27202   | 40776   | 34562   | 43675   | 31446   | 35782   |       |
| LIPID-N-0538 | PI(20:4, 18:1) | 磷脂酰肌醇_PI(20:4, 18:1)  | GP      | 甘油磷脂类  | PI       | 磷脂酰肌醇  | C47H81O13P  | 615990   | 772740  | 1162300 | 907230  | 635390  | 792220  | 548970  | 958540  | 1051900 | 965870  | 1522400 | 1441800 | 1378300 | 1501000 | 1422000 |       |
| LIPID-N-0539 | PI(18:0, 20:5) | 磷脂酰肌醇_PI(18:0, 20:5)  | GP      | 甘油磷脂类  | PI       | 磷脂酰肌醇  | C47H81O13P  | 16065    | 22152   | 13325   | 18437   | 10317   | 9593.3  | 9588.8  | 14786   | 22897   | 17733   | 18067   | 22905   | 11436   | 14760   | 24369   |       |
| LIPID-N-0541 | PI(18:1, 22:4) | 磷脂酰肌醇_PI(18:1, 22:4)  | GP      | 甘油磷脂类  | PI       | 磷脂酰肌醇  | C49H85O13P  | 116783   | 4414    | 23181   | 5911.3  | 2172    | 7714.4  | 5391    | 11921   | 11664   | 12794   | 17191   | 6652.7  | 14460   | 17387   | 11690   |       |
| LIPID-N-0543 | PI(20:4, 20:1) | 磷脂酰肌醇_PI(20:4, 20:1)  | GP      | 甘油磷脂类  | PI       | 磷脂酰肌醇  | C49H85O13P  | 42244    | 29113   | 38032   | 58479   | 22474   | 31039   | 29807   | 36447   | 43898   | 29824   | 27880   | 29128   | 40227   | 35582   | 32997   |       |
| LIPID-N-0544 | PI(18:0, 22:5) | 磷脂酰肌醇_PI(18:0, 22:5)  | GP      | 甘油磷脂类  | PI       | 磷脂酰肌醇  | C49H85O13P  | 15108    | 32945   | 19040   | 31599   | 27101   | 19716   | 16991   | 44535   | 37411   | 33859   | 99946   | 112290  | 83843   | 89727   | 80156   |       |
| LIPID-N-0547 | PI(18:2, 20:4) | 磷脂酰肌醇_PI(18:2, 20:4)  | GP      | 甘油磷脂类  | PI       | 磷脂酰肌醇  | C47H79O13P  | 66858    | 45198   | 90148   | 54052   | 37054   | 53802   | 46932   | 69529   | 87413   | 56609   | 146420  | 121870  | 137440  | 118910  | 115990  |       |
| LIPID-N-0548 | PI(16:0, 22:6) | 磷脂酰肌醇_PI(16:0, 22:6)  | GP      | 甘油磷脂类  | PI       | 磷脂酰肌醇  | C47H79O13P  | 13250    | 21664   | 17101   | 9566.8  | 11503   | 7704.5  | 5090.6  | 5764    | 15800   | 15810   | 25350   | 39941   | 37719   | 27551   | 31737   |       |
| LIPID-N-0549 | PI(18:1, 20:5) | 磷脂酰肌醇_PI(18:1, 20:5)  | GP      | 甘油磷脂类  | PI       | 磷脂酰肌醇  | C47H79O13P  | 13078    | 18715   | 25777   | 19467   | 21752   | 21666   | 11132   | 14426   | 12840   | 20195   | 10149   | 18931   | 24438   | 13270   | 9929.8  |       |
| LIPID-N-0550 | PI(17:0, 22:6) | 磷脂酰肌醇_PI(17:0, 22:6)  | GP      | 甘油磷脂类  | PI       | 磷脂酰肌醇  | C48H81O13P  | 4448     | 10373   | 19360   | 14137   | 9672.8  | 20163   | 6163    | 25294   | 12654   | 18568   | 24548   | 50539   | 49804   | 58808   | 31968   | 34153 |
| LIPID-N-0551 | PI(18:0, 22:6) | 磷脂酰肌醇_PI(18:0, 22:6)  | GP      | 甘油磷脂类  | PI       | 磷脂酰肌醇  | C49H83O13P  | 69977    | 81396   | 49663   | 77716   | 67417   | 53688   | 71551   | 78167   | 112020  | 83122   | 153520  | 152020  | 147110  | 131980  | 126260  |       |
| LIPID-N-0556 | PI(18:1, 22:6) | 磷脂酰肌醇_PI(18:1, 22:6)  | GP      | 甘油磷脂类  | PI       | 磷脂酰肌醇  | C49H81O13P  | 42910    | 55500   | 85042   | 53157   | 46412   | 75728   | 55864   | 36129   | 72651   | 59979   | 80461   | 90309   | 109730  | 88580   | 90458   |       |
| LIPID-N-0557 | PI(20:4, 20:4) | 磷脂酰肌醇_PI(20:4, 20:4)  | GP      | 甘油磷脂类  | PI       | 磷脂酰肌醇  | C49H79O13P  | 30347    | 29351   | 33475   | 16541   | 17469   | 29583   | 15518   | 22803   | 17418   | 25204   | 38729   | 41437   | 12469   | 26946   | 30751   |       |
| LIPID-N-0563 | PS(18:0, 18:0) | 磷脂酰丝氨酸_PS(18:0, 18:0) | GP      | 甘油磷脂类  | PS       | 磷脂酰丝氨酸 | C42H82NO10P | 16672000 | 2276900 | 2034500 | 2685600 | 2385000 | 2594700 | 2200300 | 2677500 | 2543000 | 3044600 | 2763400 | 3372500 | 2811500 | 2954200 | 2726000 |       |
| LIPID-N-0566 | PS(17:0, 16:1) | 磷脂酰丝氨酸_PS(17:0, 16:1) | GP      | 甘油磷脂类  | PS       | 磷脂酰丝氨酸 | C           |          |         |         |         |         |         |         |         |         |         |         |         |         |         |         |       |

| Index        | Compounds           | 物质                  | Class I | 物质一級分类 | Class II | 物质二級分类 | Formula   | ND1     | ND2     | ND3     | ND4     | ND5     | HF1     | HF2     | HF3     | HF4     | HF5     | AST-H1  | AST-H2  | AST-H3  | AST-H4  | AST-H5  |
|--------------|---------------------|---------------------|---------|--------|----------|--------|-----------|---------|---------|---------|---------|---------|---------|---------|---------|---------|---------|---------|---------|---------|---------|---------|
| LIPID-N-0620 | LPA(0;0;22;6)       | 沿血脂脂酸_LPA(0;0;22;6) | GP      | 甘油脂类   | LPA      | 沿血脂脂酸  | C25H59O7P | 6243.1  | 21025   | 21923   | 21392   | 12711   | 25179   | 32350   | 6993.4  | 44575   | 15443   | 61984   | 50893   | 73777   | 38317   | 43392   |
| LIPID-N-0623 | PA(16;0_16;0)       | 磷脂酸_PA(16;0_16;0)   | GP      | 甘油脂类   | PA       | 磷脂酸    | C35H69O8P | 14197   | 10043   | 42545   | 15581   | 13494   | 15431   | 10380   | 19041   | 21725   | 13717   | 32780   | 22760   | 15443   | 25996   | 16736   |
| LIPID-N-0624 | PA(16;0_18;0)       | 磷脂酸_PA(16;0_18;0)   | GP      | 甘油脂类   | PA       | 磷脂酸    | C37H73O8P | 9       | 5591.2  | 10283   | 4841.8  | 6171.1  | 9       | 9       | 5854.3  | 9       | 4103.7  | 11695   | 6503.2  | 5992.2  | 15439   | 4300.2  |
| LIPID-N-0630 | PA(16;0_18;1)       | 磷脂酸_PA(16;0_18;1)   | GP      | 甘油脂类   | PA       | 磷脂酸    | C37H71O8P | 32381   | 27286   | 45046   | 37720   | 24707   | 39110   | 29279   | 31411   | 42788   | 24057   | 24463   | 24213   | 31179   | 20999   | 21987   |
| LIPID-N-0631 | PA(18;0_18;1)       | 磷脂酸_PA(18;0_18;1)   | GP      | 甘油脂类   | PA       | 磷脂酸    | C39H75O8P | 19562   | 16531   | 8916.8  | 24829   | 19062   | 17813   | 17789   | 13411   | 12041   | 15516   | 9374.1  | 7245.6  | 8874.6  | 4439.6  | 8226.5  |
| LIPID-N-0633 | PA(16;0_18;2)       | 磷脂酸_PA(16;0_18;2)   | GP      | 甘油脂类   | PA       | 磷脂酸    | C37H69O8P | 14434   | 9764.5  | 17018   | 15750   | 7208.5  | 16802   | 10618   | 9717.2  | 27170   | 27120   | 23053   | 39503   | 17819   | 29677   | 25185   |
| LIPID-N-0635 | PA(18;1_18;1)       | 磷脂酸_PA(18;1_18;1)   | GP      | 甘油脂类   | PA       | 磷脂酸    | C39H73O8P | 233810  | 260570  | 364070  | 420420  | 225560  | 341950  | 250200  | 225630  | 216780  | 248930  | 155780  | 129050  | 216150  | 110910  | 156900  |
| LIPID-N-0639 | PA(18;2_18;2)       | 磷脂酸_PA(18;2_18;2)   | GP      | 甘油脂类   | PA       | 磷脂酸    | C39H69O8P | 33974   | 13203   | 23996   | 14084   | 9910.8  | 11190   | 28892   | 33609   | 33796   | 26132   | 55373   | 58483   | 58574   | 45501   | 45704   |
| LIPID-N-0640 | PA(18;0_20;4)       | 磷脂酸_PA(18;0_20;4)   | GP      | 甘油脂类   | PA       | 磷脂酸    | C41H73O8P | 35470   | 125440  | 79823   | 124400  | 147050  | 123530  | 69526   | 155710  | 260520  | 67977   | 168420  | 128060  | 182270  | 152860  | 102100  |
| LIPID-N-0641 | PA(20;4_16;1)       | 磷脂酸_PA(20;4_16;1)   | GP      | 甘油脂类   | PA       | 磷脂酸    | C39H67O8P | 12061   | 10902   | 5334    | 5431.1  | 9       | 21084   | 8871.4  | 15874   | 6052.9  | 7510.4  | 9552.3  | 10251   | 4820.2  | 8935.5  | 6738.6  |
| LIPID-N-0643 | PA(16;1_22;4)       | 磷脂酸_PA(16;1_22;4)   | GP      | 甘油脂类   | PA       | 磷脂酸    | C41H71O8P | 148980  | 216190  | 209160  | 155720  | 149150  | 200570  | 148180  | 199230  | 196010  | 284330  | 184920  | 156380  | 115860  | 20620   | 167220  |
| LIPID-N-0647 | PA(18;0_22;6)       | 磷脂酸_PA(18;0_22;6)   | GP      | 甘油脂类   | PA       | 磷脂酸    | C43H73O8P | 29896   | 41917   | 83253   | 45113   | 56334   | 40038   | 28701   | 32959   | 43553   | 40043   | 52372   | 32964   | 35605   | 58708   | 45475   |
| LIPID-N-0650 | PA(18;1_22;6)       | 磷脂酸_PA(18;1_22;6)   | GP      | 甘油脂类   | PA       | 磷脂酸    | C43H71O8P | 657970  | 1563100 | 1668400 | 1241200 | 980890  | 1244500 | 1008200 | 349960  | 819730  | 661210  | 214980  | 203210  | 420120  | 218980  | 195150  |
| LIPID-P-0001 | DL-Carnitine        | DL-肉碱               | FA      | 脂肪酰类   | CAR      | 酰基肉碱   | C7H15NO3  | 1873800 | 3352000 | 3497300 | 3381700 | 3428900 | 3438100 | 2907900 | 2529400 | 2558200 | 2772700 | 2408200 | 2638700 | 2274600 | 1935200 | 2224700 |
| LIPID-P-0002 | Carnitine C2:0      | O-乙酰肉碱              | FA      | 脂肪酰类   | CAR      | 酰基肉碱   | C9H17NO4  | 319130  | 886050  | 964230  | 527980  | 1005600 | 268700  | 384220  | 219060  | 259240  | 309890  | 567340  | 465310  | 174320  | 369870  | 464750  |
| LIPID-P-0003 | Carnitine C3:0      | 肉碱 C3:0             | FA      | 脂肪酰类   | CAR      | 酰基肉碱   | C10H19NO4 | 61215   | 265740  | 130840  | 299620  | 344250  | 123180  | 187600  | 124420  | 99862   | 169080  | 287950  | 529490  | 176970  | 241480  | 385340  |
| LIPID-P-0004 | Carnitine C4:0      | 肉碱 C4:0             | FA      | 脂肪酰类   | CAR      | 酰基肉碱   | C11H21NO4 | 28624   | 68382   | 71799   | 100820  | 57903   | 75568   | 74975   | 49277   | 70319   | 93228   | 166260  | 156800  | 137430  | 126950  | 117220  |
| LIPID-P-0005 | Carnitine C5:0      | 肉碱 C5:0             | FA      | 脂肪酰类   | CAR      | 酰基肉碱   | C12H23NO4 | 58460   | 752530  | 563600  | 406770  | 395160  | 717800  | 429040  | 460280  | 441680  | 516700  | 666200  | 408180  | 611650  | 425190  | 412310  |
| LIPID-P-0006 | Carnitine C4:OH     | 肉碱 C4:OH            | FA      | 脂肪酰类   | CAR      | 酰基肉碱   | C11H21NO5 | 33384   | 232440  | 232150  | 310350  | 187050  | 187860  | 147290  | 144600  | 172280  | 119820  | 477120  | 248320  | 325070  | 382670  | 170370  |
| LIPID-P-0007 | Carnitine C6:0      | 肉碱 C6:0             | FA      | 脂肪酰类   | CAR      | 酰基肉碱   | C12H23NO5 | 12657   | 26934   | 32498   | 48399   | 21738   | 39365   | 20935   | 25513   | 25767   | 36737   | 30878   | 39805   | 23378   | 25305   | 26135   |
| LIPID-P-0008 | Carnitine C5:OH     | 肉碱 C5:OH            | FA      | 脂肪酰类   | CAR      | 酰基肉碱   | C12H23NO5 | 151600  | 184370  | 172560  | 222610  | 202320  | 172560  | 182180  | 139210  | 151440  | 161970  | 203110  | 196440  | 176090  | 164620  | 161990  |
| LIPID-P-0009 | Carnitine C6:OH     | 肉碱 C6:OH            | FA      | 脂肪酰类   | CAR      | 酰基肉碱   | C13H25NO5 | 108790  | 51952   | 42057   | 89424   | 45136   | 82602   | 102140  | 60474   | 83520   | 102270  | 189230  | 157610  | 155120  | 143190  | 152740  |
| LIPID-P-0010 | Carnitine C8:0      | 肉碱 C8:0             | FA      | 脂肪酰类   | CAR      | 酰基肉碱   | C15H29NO6 | 26797   | 49241   | 33474   | 82495   | 42885   | 83677   | 73104   | 59472   | 67994   | 76077   | 80881   | 61561   | 45281   | 46233   | 42885   |
| LIPID-P-0011 | Carnitine C6:2OH    | 肉碱 C6:2OH           | FA      | 脂肪酰类   | CAR      | 酰基肉碱   | C13H23NO6 | 136710  | 138510  | 125460  | 109900  | 118000  | 126870  | 123160  | 130540  | 124000  | 150960  | 142880  | 111810  | 116210  | 129860  | 121220  |
| LIPID-P-0013 | Carnitine C10:0     | 肉碱 C10:0            | FA      | 脂肪酰类   | CAR      | 酰基肉碱   | C17H33NO4 | 1323.1  | 45523   | 55429   | 95966   | 20516   | 25956   | 14764   | 24417   | 30868   | 32196   | 41491   | 54875   | 30284   | 18122   | 21330   |
| LIPID-P-0014 | Carnitine C12:0     | 肉碱 C12:0            | FA      | 脂肪酰类   | CAR      | 酰基肉碱   | C19H37NO4 | 9       | 36927   | 47988   | 109300  | 22491   | 22597   | 13300   | 22614   | 14989   | 11571   | 32717   | 46686   | 21902   | 31498   | 24749   |
| LIPID-P-0016 | Carnitine C12:OH    | 肉碱 C12:OH           | FA      | 脂肪酰类   | CAR      | 酰基肉碱   | C19H37NO5 | 17549   | 9       | 9       | 6019.6  | 4601.2  | 28399   | 84182   | 28390   | 34938   | 36500   | 43109   | 26173   | 57332   | 38142   | 25334   |
| LIPID-P-0017 | Carnitine C14:0     | 肉碱 C14:0            | FA      | 脂肪酰类   | CAR      | 酰基肉碱   | C21H41NO4 | 16823   | 376810  | 423740  | 933450  | 258090  | 196350  | 111390  | 204990  | 106010  | 178260  | 448910  | 360570  | 192540  | 266170  | 622320  |
| LIPID-P-0018 | Carnitine C15:0     | 肉碱 C15:0            | FA      | 脂肪酰类   | CAR      | 酰基肉碱   | C22H43NO4 | 5226.3  | 31385   | 51200   | 40666   | 22510   | 18227   | 19639   | 51231   | 23337   | 41563   | 26077   | 72846   | 66584   | 43952   | 48451   |
| LIPID-P-0019 | Carnitine C12:1,2OH | 肉碱 C12:1,2OH        | FA      | 脂肪酰类   | CAR      | 酰基肉碱   | C19H35NO6 | 119300  | 104740  | 164760  | 122550  | 123720  | 117580  | 126110  | 131360  | 136020  | 150240  | 112560  | 144640  | 110980  | 122270  | 100800  |
| LIPID-P-0020 | Carnitine C14:OH    | 肉碱 C14:OH           | FA      | 脂肪酰类   | CAR      | 酰基肉碱   | C21H41NO5 | 9       | 48114   | 43788   | 96193   | 29596   | 23669   | 9718.7  | 20632   | 11397   | 10296   | 37671   | 30725   | 18431   | 31346   | 19080   |
| LIPID-P-0021 | Carnitine C16:0     | 肉碱 C16:0            | FA      | 脂肪酰类   | CAR      | 酰基肉碱   | C23H45NO4 | 292590  | 3851100 | 4979800 | 4466800 | 2893900 | 1951500 | 1713100 | 2156100 | 3006100 | 2400200 | 5734500 | 4794300 | 3290800 | 4128200 | 4148000 |
| LIPID-P-0022 | Carnitine C16:OH    | 肉碱 C16:OH           | FA      | 脂肪酰类   | CAR      | 酰基肉碱   | C23H45NO5 | 36177   | 177790  | 210930  | 176130  | 119820  | 100870  | 56313   | 100680  | 73671   | 62497   | 240710  | 164050  | 103440  | 175960  | 95545   |
| LIPID-P-0023 | Carnitine C18:0     | 肉碱 C18:0            | FA      | 脂肪酰类   | CAR      | 酰基肉碱   | C25H49NO4 | 128600  | 612200  | 1097300 | 513590  | 463870  | 282820  | 368820  | 319640  | 468300  | 316520  | 616040  | 605440  | 712320  | 476630  | 541380  |
| LIPID-P-0024 | Carnitine C20:0     | 肉碱 C20:0            | FA      | 脂肪酰类   | CAR      | 酰基肉碱   | C27H53NO4 | 10195   | 86035   | 174390  | 68832   | 46673   | 44470   | 30682   | 27169   | 68940   | 32235   | 111930  | 43714   | 91661   | 61312   | 51732   |
| LIPID-P-0025 | Carnitine C18:OH    | 肉碱 C18:OH           | FA      | 脂肪酰类   | CAR      | 酰基肉碱   | C25H49NO5 | 15813   | 19265   | 76527   | 17056   | 16200   | 12956   | 10870   | 12872   | 14287   | 7694.8  | 19884   | 12833   | 14271   | 21072   | 14551   |
| LIPID-P-0026 | Carnitine C3:1,2OH  | 肉碱 C3:1,2OH         | FA      | 脂肪酰类   | CAR      | 酰基肉碱   | C10H17NO6 | 34294   | 222090  | 203020  | 272920  | 176730  | 139700  | 130880  | 171260  | 112280  | 444200  | 237760  | 299700  | 345560  | 157690  |         |
| LIPID-P-0027 | Carnitine C4:1,2OH  | 肉碱 C4:1,2OH         | FA      | 脂肪酰类   | CAR      | 酰基肉碱   | C11H19NO6 | 159000  | 201480  | 178700  | 237280  | 203240  | 181550  | 187190  | 148070  | 150570  | 173220  | 210160  | 191980  | 194230  | 182760  | 161970  |
| LIPID-P-0028 | Carnitine C5:1      | 肉碱 C5:1             | FA      | 脂肪酰类   | CAR      | 酰基肉碱   | C12H21NO4 | 5193.9  | 13504   | 64644   | 22364   | 10677   | 13244   | 10075   | 12994   | 12354   | 12147   | 33687   | 25196   | 20060   | 25194   | 18215   |
| LIPID-P-0029 | Carnitine C6:1      | 肉碱 C6:1             | FA      | 脂肪酰类   | CAR      | 酰基肉碱   | C13H23NO4 | 7671.9  | 7540.8  | 15485   | 23215   | 8893.9  | 24392   | 20196   | 16485   | 23395   | 26228   | 23217   | 17924   | 14084   | 18679   | 14602   |
| LIPID-P-0030 | Carnitine C5:1,2OH  | 肉碱 C5:1,2OH         | FA      | 脂肪酰类   | CAR      | 酰基肉碱   | C12H19NO6 | 2246300 | 2054900 | 1926100 | 1928300 | 2239700 | 1941800 | 2175900 | 1983600 | 2057000 | 2107900 | 1836900 | 1855400 | 1862800 | 1970800 |         |
| LIPID-P-0031 | Carnitine C8:1      | 肉碱 C8:1             | FA      | 脂肪酰类   | CAR      | 酰基肉碱   | C15H27NO4 | 9       | 5791.2  | 17076   | 14410   | 5049.5  | 12496   | 8139.9  | 8380.5  | 18802   | 10881   | 27013   | 17400   | 20095   | 14783   | 5916.3  |
| LIPID-P-0033 | Carnitine C10:1     | 肉碱 C10:1            | FA      | 脂肪酰类   | CAR      | 酰基肉碱   | C17H31NO4 | 9       | 11380   | 38230   | 35234   | 7123.7  | 8159.3  | 8543    | 10891   | 19949   | 10615   | 35841   | 27118   | 42245   | 27212   | 14071   |
| LIPID-P-0035 | Carnitine C12:1     | 肉碱 C12:1            | FA      | 脂肪酰类   | CAR      | 酰基肉碱   | C19H33NO4 | 9       | 34206   | 57753   | 65627   | 22504   | 15586   | 9       | 18839   | 10422   | 8827.6  | 45531   | 36468   | 30705   | 29521   | 21448   |
| LIPID-P-0036 | Carnitine C12:1,2OH | 肉碱 C12:1,2OH        | FA      | 脂肪酰类   | CAR      | 酰基肉碱   | C19H35NO5 | 9       | 9076.5  | 15898   | 14480   | 8690.4  | 5322.7  | 9       | 6082.5  | 2833.2  | 1985.8  | 12569   | 6521.3  | 6590.3  | 8151.7  | 9       |
| LIPID-P-0037 | Carnitine C14:1     | 肉碱 C14:1            | FA      | 脂肪酰类   | CAR      | 酰基肉碱   | C21H39NO4 |         |         |         |         |         |         |         |         |         |         |         |         |         |         |         |

| Index        | Compounds       | 物质                        | Class I | 物质一级分类 | Class II | 物质二级分类   | Formula    | ND1      | ND2      | ND3      | ND4      | ND5      | HF1      | HF2      | HF3      | HF4      | HF5      | AST-H1   | AST-H2   | AST-H3   | AST-H4   | AST-H5   |  |
|--------------|-----------------|---------------------------|---------|--------|----------|----------|------------|----------|----------|----------|----------|----------|----------|----------|----------|----------|----------|----------|----------|----------|----------|----------|--|
| LIPID-P-0104 | Cer(d18:0/20:0) | 神经酰胺_Cer(d18:0/20:0)      | SL      | 鞘脂类    | Cer      | 神经酰胺     | C38H77NO3  | 41073    | 62646    | 20344    | 48120    | 56917    | 34823    | 40152    | 43502    | 35948    | 47478    | 22636    | 24825    | 23628    | 23815    | 30393    |  |
| LIPID-P-0105 | Cer(d18:0/22:0) | 神经酰胺_Cer(d18:0/22:0)      | SL      | 鞘脂类    | Cer      | 神经酰胺     | C40H81NO3  | 16420    | 24081    | 12920    | 220370   | 186550   | 154080   | 180820   | 173890   | 142320   | 207000   | 107080   | 151880   | 165640   | 126990   | 162730   |  |
| LIPID-P-0106 | Cer(d18:0/24:0) | 神经酰胺_Cer(d18:0/24:0)      | SL      | 鞘脂类    | Cer      | 神经酰胺     | C42H85NO3  | 128140   | 173580   | 119290   | 209100   | 139040   | 93020    | 165610   | 178040   | 151450   | 163000   | 132020   | 222720   | 193160   | 136280   | 232520   |  |
| LIPID-P-0107 | Cer(d18:0/24:1) | 神经酰胺_Cer(d18:0/24:1)      | SL      | 鞘脂类    | Cer      | 神经酰胺     | C42H83NO3  | 349370   | 722630   | 502400   | 649110   | 588180   | 477470   | 525870   | 492560   | 576010   | 555720   | 386630   | 468850   | 404100   | 396580   | 396650   |  |
| LIPID-P-0108 | Cer(d18:1/14:0) | 神经酰胺_Cer(d18:1/14:0)      | SL      | 鞘脂类    | Cer      | 神经酰胺     | C32H63NO3  | 13106    | 33163    | 15453    | 18632    | 6576.6   | 33270    | 38385    | 25861    | 32446    | 26335    | 5513.1   | 4797.4   | 8711.2   | 15928    | 4512.2   |  |
| LIPID-P-0109 | Cer(d18:1/16:0) | 神经酰胺_Cer(d18:1/16:0)      | SL      | 鞘脂类    | Cer      | 神经酰胺     | C34H67NO3  | 130250   | 227010   | 26220    | 331920   | 3803500  | 960680   | 3209100  | 1153600  | 3800900  | 2042200  | 3986100  | 2689500  | 1948900  | 2402300  | 5137200  |  |
| LIPID-P-0110 | Cer(d18:1/17:0) | 神经酰胺_Cer(d18:1/17:0)      | SL      | 鞘脂类    | Cer      | 神经酰胺     | C35H69NO3  | 5622.4   | 20019    | 33999    | 33611    | 21313    | 11353    | 21068    | 38522    | 18650    | 28145    | 40803    | 16951    | 30520    | 55917    | 65382    |  |
| LIPID-P-0111 | Cer(d18:1/18:0) | 神经酰胺_Cer(d18:1/18:0)      | SL      | 鞘脂类    | Cer      | 神经酰胺     | C36H71NO3  | 278350   | 803500   | 1145900  | 487630   | 310570   | 369560   | 272970   | 556850   | 396400   | 721330   | 595670   | 920460   | 306140   | 699090   | 400820   |  |
| LIPID-P-0113 | Cer(d18:1/20:0) | 神经酰胺_Cer(d18:1/20:0)      | SL      | 鞘脂类    | Cer      | 神经酰胺     | C38H75NO3  | 277000   | 472260   | 458750   | 521590   | 355230   | 316090   | 431890   | 384780   | 410410   | 403210   | 414850   | 564430   | 404840   | 382350   | 563540   |  |
| LIPID-P-0114 | Cer(d18:1/21:0) | 神经酰胺_Cer(d18:1/21:0)      | SL      | 鞘脂类    | Cer      | 神经酰胺     | C39H77NO3  | 26271    | 70899    | 30250    | 20622    | 58001    | 37238    | 73005    | 83550    | 28325    | 21571    | 47724    | 43433    | 66657    | 32414    | 73761    |  |
| LIPID-P-0115 | Cer(d18:1/22:0) | 神经酰胺_Cer(d18:1/22:0)      | SL      | 鞘脂类    | Cer      | 神经酰胺     | C40H79NO3  | 2693800  | 1143800  | 3259300  | 2666900  | 2098100  | 1726100  | 2200500  | 2397600  | 1642000  | 1162600  | 4701400  | 1479400  | 1985200  | 2544200  | 1139700  |  |
| LIPID-P-0116 | Cer(d18:1/23:0) | 神经酰胺_Cer(d18:1/23:0)      | SL      | 鞘脂类    | Cer      | 神经酰胺     | C41H81NO3  | 529090   | 534410   | 1319900  | 1279800  | 842580   | 1183500  | 934730   | 1026000  | 724480   | 1002000  | 1008700  | 2696100  | 2389500  | 2424900  | 2226300  |  |
| LIPID-P-0118 | Cer(d18:1/25:0) | 神经酰胺_Cer(d18:1/25:0)      | SL      | 鞘脂类    | Cer      | 神经酰胺     | C43H85NO3  | 136980   | 261460   | 170860   | 317240   | 263010   | 121660   | 295950   | 208360   | 445820   | 208570   | 184180   | 189510   | 196280   | 198220   | 592560   |  |
| LIPID-P-0120 | Cer(d18:1/16:1) | 神经酰胺_Cer(d18:1/16:1)      | SL      | 鞘脂类    | Cer      | 神经酰胺     | C34H65NO3  | 162250   | 209320   | 1802900  | 143060   | 157940   | 145870   | 153400   | 151510   | 161200   | 145330   | 173430   | 199910   | 210000   | 162260   | 175150   |  |
| LIPID-P-0121 | Cer(d18:1/18:1) | 神经酰胺_Cer(d18:1/18:1)      | SL      | 鞘脂类    | Cer      | 神经酰胺     | C36H69NO3  | 118770   | 220260   | 238520   | 161530   | 164190   | 113100   | 183000   | 139660   | 109540   | 125430   | 191610   | 150780   | 175630   | 201450   | 194090   |  |
| LIPID-P-0122 | Cer(d18:1/20:1) | 神经酰胺_Cer(d18:1/20:1)      | SL      | 鞘脂类    | Cer      | 神经酰胺     | C38H73NO3  | 86346    | 188930   | 175690   | 152740   | 135580   | 108270   | 107220   | 122560   | 123640   | 116530   | 118570   | 96666    | 111900   | 98233    | 125670   |  |
| LIPID-P-0123 | Cer(d18:1/22:1) | 神经酰胺_Cer(d18:1/22:1)      | SL      | 鞘脂类    | Cer      | 神经酰胺     | C40H77NO3  | 852280   | 777370   | 989120   | 1253800  | 925990   | 586790   | 796940   | 1271900  | 698590   | 1116500  | 553930   | 407970   | 451100   | 757660   | 541700   |  |
| LIPID-P-0124 | Cer(d18:1/24:1) | 神经酰胺_Cer(d18:1/24:1)      | SL      | 鞘脂类    | Cer      | 神经酰胺     | C42H81NO3  | 1937800  | 8118900  | 1242800  | 9566800  | 3699200  | 2881900  | 5115800  | 4292100  | 3513500  | 5039800  | 3620000  | 10935000 | 3407700  | 7652000  | 9438700  |  |
| LIPID-P-0125 | Cer(d18:1/26:1) | 神经酰胺_Cer(d18:1/26:1)      | SL      | 鞘脂类    | Cer      | 神经酰胺     | C44H85NO3  | 46391    | 54341    | 128730   | 60625    | 60544    | 35998    | 61039    | 49580    | 70117    | 67157    | 95145    | 95965    | 110840   | 103310   | 108850   |  |
| LIPID-P-0129 | Cer(d16:1/22:0) | 神经酰胺_Cer(d16:1/22:0)      | SL      | 鞘脂类    | Cer      | 神经酰胺     | C33H75NO3  | 31064    | 29560    | 22074    | 47913    | 29733    | 19968    | 16264    | 27435    | 11121    | 25067    | 15413    | 35265    | 14646    | 20941    | 43454    |  |
| LIPID-P-0130 | Cer(d16:1/23:0) | 神经酰胺_Cer(d16:1/23:0)      | SL      | 鞘脂类    | Cer      | 神经酰胺     | C33H77NO3  | 19533    | 12299    | 14712    | 25609    | 14445    | 9830.2   | 9702.5   | 26020    | 10322    | 5412.3   | 7620.4   | 27942    | 21301    | 9683.7   | 20363    |  |
| LIPID-P-0131 | Cer(d16:1/24:0) | 神经酰胺_Cer(d16:1/24:0)      | SL      | 鞘脂类    | Cer      | 神经酰胺     | C40H79NO3  | 20285    | 31376    | 39055    | 25544    | 27582    | 18076    | 27320    | 20422    | 15549    | 21958    | 17732    | 31494    | 24336    | 11424    | 29289    |  |
| LIPID-P-0132 | Cer(d16:1/24:1) | 神经酰胺_Cer(d16:1/24:1)      | SL      | 鞘脂类    | Cer      | 神经酰胺     | C40H77NO3  | 87498    | 43735    | 86823    | 62888    | 74643    | 55161    | 53130    | 37077    | 24366    | 31149    | 42830    | 48330    | 35985    | 55675    | 61511    |  |
| LIPID-P-0134 | Cer(d18:2/16:0) | 神经酰胺_Cer(d18:2/16:0)      | SL      | 鞘脂类    | Cer      | 神经酰胺     | C34H65NO3  | 51281    | 14370    | 250420   | 85395    | 124430   | 13164    | 66885    | 37715    | 50061    | 31009    | 73041    | 105820   | 97585    | 89378    | 73246    |  |
| LIPID-P-0136 | Cer(d18:2/18:0) | 神经酰胺_Cer(d18:2/18:0)      | SL      | 鞘脂类    | Cer      | 神经酰胺     | C36H69NO3  | 12774    | 32739    | 159200   | 41757    | 20390    | 23249    | 45513    | 15235    | 26210    | 67762    | 50494    | 74026    | 17505    | 76734    | 53526    |  |
| LIPID-P-0137 | Cer(d18:2/20:0) | 神经酰胺_Cer(d18:2/20:0)      | SL      | 鞘脂类    | Cer      | 神经酰胺     | C38H73NO3  | 60837    | 89469    | 273280   | 58728    | 97533    | 76063    | 49148    | 59439    | 103560   | 47195    | 71181    | 77054    | 63842    | 40485    | 92347    |  |
| LIPID-P-0138 | Cer(d18:2/21:0) | 神经酰胺_Cer(d18:2/21:0)      | SL      | 鞘脂类    | Cer      | 神经酰胺     | C39H75NO3  | 18478    | 17924    | 33740    | 18675    | 14183    | 17369    | 18169    | 16342    | 15007    | 19785    | 13984    | 18472    | 13643    | 15770    | 14482    |  |
| LIPID-P-0139 | Cer(d18:2/22:0) | 神经酰胺_Cer(d18:2/22:0)      | SL      | 鞘脂类    | Cer      | 神经酰胺     | C40H77NO3  | 357870   | 229640   | 386470   | 224290   | 269210   | 242030   | 306410   | 306410   | 266760   | 229220   | 343300   | 197040   | 378460   | 268690   | 382560   |  |
| LIPID-P-0140 | Cer(d18:2/23:0) | 神经酰胺_Cer(d18:2/23:0)      | SL      | 鞘脂类    | Cer      | 神经酰胺     | C41H79NO3  | 222870   | 294280   | 470640   | 154150   | 94880    | 60773    | 402700   | 124800   | 178880   | 90293    | 231570   | 85148    | 114160   | 208730   | 167680   |  |
| LIPID-P-0141 | Cer(d18:2/24:0) | 神经酰胺_Cer(d18:2/24:0)      | SL      | 鞘脂类    | Cer      | 神经酰胺     | C42H81NO3  | 274460   | 489590   | 734920   | 179420   | 204040   | 190440   | 223230   | 167560   | 226070   | 218940   | 783890   | 572940   | 313870   | 294980   | 266820   |  |
| LIPID-P-0142 | Cer(d18:2/24:1) | 神经酰胺_Cer(d18:2/24:1)      | SL      | 鞘脂类    | Cer      | 神经酰胺     | C42H79NO3  | 28890    | 28320    | 131690   | 345200   | 418410   | 329680   | 498030   | 373420   | 214280   | 602550   | 527690   | 607550   | 626350   | 289430   | 408460   |  |
| LIPID-P-0143 | Cer(d18:1/18:1) | 1-鞘脂神经酰胺_CerP(d18:1/18:1) | SL      | 鞘脂类    | CerP     | 1-鞘脂神经酰胺 | C36H70NO6P | 10416    | 11150    | 21460    | 16813    | 12466    | 17432    | 11257    | 16773    | 19653    | 17174    | 27399    | 30241    | 16510    | 30157    | 24334    |  |
| LIPID-P-0159 | Coenzyme Q8     | 辅酶Q_Coenzyme Q8           | PR      | 异戊烯醇脂类 | CoQ      | 辅酶Q      | C53H80O4   | 3985900  | 4896500  | 3000900  | 5261100  | 5110400  | 4095300  | 4625900  | 3637500  | 4730200  | 3756700  | 4037500  | 4346900  | 3895300  | 4603800  | 4188000  |  |
| LIPID-P-0160 | Coenzyme Q9     | 辅酶Q_Coenzyme Q9           | PR      | 异戊烯醇脂类 | CoQ      | 辅酶Q      | C54H82O4   | 2148900  | 23044000 | 46826000 | 2716100  | 25681000 | 30179000 | 32374000 | 25106000 | 37252000 | 28598000 | 28035000 | 37657000 | 26379000 | 30138000 | 26036000 |  |
| LIPID-P-0161 | Coenzyme Q10    | 辅酶Q_Coenzyme Q10          | PR      | 异戊烯醇脂类 | CoQ      | 辅酶Q      | C59H90O4   | 1102100  | 1031400  | 2239700  | 1103100  | 1036500  | 2225500  | 2411800  | 1173500  | 2032800  | 1506300  | 670440   | 484640   | 859070   | 541130   |          |  |
| LIPID-P-0167 | DG(14:0_16:0)   | 甘油二酯_DG(14:0_16:0)        | GL      | 甘油酯类   | DG       | 甘油二酯     | C35H66O4   | 24468    | 41921    | 36963    | 66798    | 50672    | 25704    | 27404    | 16409    | 11840    | 16678    | 12619    | 27718    | 32619    | 42796    | 20246    |  |
| LIPID-P-0169 | DG(16:0_16:0)   | 甘油二酯_DG(16:0_16:0)        | GL      | 甘油酯类   | DG       | 甘油二酯     | C35H68O4   | 139240   | 1436500  | 1437800  | 1547300  | 1641700  | 1799300  | 999880   | 1149700  | 1436000  | 1536300  | 1631600  | 1216900  | 1559000  | 1050800  | 945130   |  |
| LIPID-P-0174 | DG(16:0_18:0)   | 甘油二酯_DG(16:0_18:0)        | GL      | 甘油酯类   | DG       | 甘油二酯     | C37H72O4   | 129900   | 1588400  | 2007800  | 1428500  | 879970   | 1296600  | 1165200  | 1535900  | 1110400  | 955130   | 923900   | 1482300  | 1513400  | 1664900  | 1031700  |  |
| LIPID-P-0178 | DG(18:0_18:0)   | 甘油二酯_DG(18:0_18:0)        | GL      | 甘油酯类   | DG       | 甘油二酯     | C39H76O4   | 2199200  | 1779500  | 1066300  | 1262400  | 3045900  | 1241500  | 2008700  | 1730600  | 1607200  | 1700900  | 1032300  | 730990   | 702730   | 1483000  | 1493300  |  |
| LIPID-P-0181 | DG(19:0_18:0)   | 甘油二酯_DG(19:0_18:0)        | GL      | 甘油酯类   | DG       | 甘油二酯     | C40H78O4   | 88152    | 78837    | 96283    | 84717    | 107200   | 87175    | 69709    | 99782    | 84709    | 100230   | 107590   | 100100   | 87815    | 91199    | 118580   |  |
| LIPID-P-0182 | DG(21:0_16:0)   | 甘油二酯_DG(21:0_16:0)        | GL      | 甘油酯类   | DG       | 甘油二酯     | C40H78O4   | 78023    | 83012    | 79746    | 77430    | 115290   | 84839    | 118480   | 129780   | 97771    | 103940   | 114800   | 123760   | 115980   | 119380   | 109300   |  |
| LIPID-P-0188 | DG(14:0_16:1)   | 甘油二酯_DG(14:0_16:1)        | GL      | 甘油酯类   | DG       | 甘油二酯     | C33H66O4   | 349450   | 309390   | 389830   | 323080   | 335240   | 296670   | 284580   | 302760   | 296730   | 337230   | 310710   | 296860   | 291280   | 312280   | 287490   |  |
| LIPID-P-0191 | DG(14:0_18:1)   | 甘油二酯_DG(14:0_18:1)        | GL      | 甘油酯类   | DG       | 甘油二酯     | C35H66O4   | 429660   | 339450   | 331630   | 753490   | 392870   | 536290   | 305820   | 370560   | 283950   | 340960   | 184430   | 140470   | 93449    | 158660   | 211260   |  |
| LIPID-P-0192 | DG(16:0_16:1)   | 甘油二酯_DG(16:0_16:1)        | GL      | 甘油酯类   | DG       | 甘油二酯     | C35H66O4   | 1490700  | 1515800  | 1273500  | 1338800  | 1204000  | 758580   | 545920   | 749660   | 496240   | 942870   | 389190   | 384490   | 245000   | 450120   | 360810   |  |
| LIPID-P-0193 | DG(16:0_17:1)   | 甘油二酯_DG(16:0_17:1)        | GL      | 甘油酯类   | DG       | 甘油二酯     | C36H68O4   | 52745    | 34280    | 30914    | 58109    | 44133    | 49341    | 43443    | 48418    | 28452    | 63199    | 42547    | 23840    | 22041    | 28251    | 27978    |  |
| LIPID-P-0194 | DG(15:0_18:1)   | 甘油二酯_DG(15:0_18:1)        | GL      | 甘油酯类   | DG       | 甘油二酯     | C36H68O4   | 55585    | 36471    | 48705    | 70509    | 49605    | 53428    | 67541    | 63194    | 54172    | 50589    | 41794    | 48107    | 48670    | 48690    | 37709    |  |
| LIPID-P-0195 | DG(16:1_18:0)   | 甘油二酯_DG(16:1_18:0)        | GL      | 甘油酯类   | DG       | 甘油二酯     | C37H70O4   | 80489    | 58376    | 59389    | 84073    | 109650   | 89191    | 39590    | 37394    | 40882    | 52321    | 29590    | 16323    | 19874    | 22795    | 31365    |  |
| LIPID-P-0196 | DG(16:0_18:1)   | 甘油二酯_DG(16:0_18:1)        | GL      | 甘油酯类   | DG       | 甘油二酯     | C37H70O4   | 16377000 | 14518000 | 12606000 | 18783000 | 15852000 | 18038000 | 11782000 |          |          |          |          |          |          |          |          |  |

| Index        | Compounds          | 物质                     | Class I | 物质一級分类 | Class II | 物质二級分类 | Formula   | ND1     | ND2     | ND3      | ND4     | ND5     | HFD1     | HFD2    | HFD3    | HFD4    | HFD5    | AST-H1   | AST-H2  | AST-H3  | AST-H4  | AST-H5  |
|--------------|--------------------|------------------------|---------|--------|----------|--------|-----------|---------|---------|----------|---------|---------|----------|---------|---------|---------|---------|----------|---------|---------|---------|---------|
| LIPID-P-0234 | DG(18:0_20:3)      | 甘油二酯_DG(18:0_20:3)     | GL      | 甘油酯类   | DG       | 甘油二酯   | C41H74O5  | 219100  | 403700  | 99669    | 429880  | 274980  | 194930   | 165320  | 206470  | 103970  | 200580  | 91466    | 214250  | 97854   | 141080  | 164560  |
| LIPID-P-0235 | DG(18:1_22:2)      | 甘油二酯_DG(18:1_22:2)     | GL      | 甘油酯类   | DG       | 甘油二酯   | C43H78O5  | 37482   | 142078  | 41059    | 41853   | 2191    | 22184    | 15411   | 19559   | 18349   | 37125   | 23228    | 10545   | 10349   | 14193   | 13396   |
| LIPID-P-0236 | DG(18:2_22:1)      | 甘油二酯_DG(18:2_22:1)     | GL      | 甘油酯类   | DG       | 甘油二酯   | C43H78O5  | 36523   | 14929   | 29039    | 21084   | 17315   | 28814    | 4000.6  | 13815   | 13175   | 31674   | 29478    | 19224   | 7622    | 35873   | 41466   |
| LIPID-P-0238 | DG(16:1_18:3)      | 甘油二酯_DG(16:1_18:3)     | GL      | 甘油酯类   | DG       | 甘油二酯   | C37H64O5  | 125100  | 83372   | 226750   | 66559   | 137350  | 63692    | 44751   | 54393   | 36374   | 57272   | 109320   | 26145   | 49992   | 154920  | 58575   |
| LIPID-P-0239 | DG(16:0_20:4)      | 甘油二酯_DG(16:0_20:4)     | GL      | 甘油酯类   | DG       | 甘油二酯   | C39H68O5  | 4919700 | 3751100 | 482100   | 4622700 | 4363600 | 3075100  | 3037800 | 4216600 | 2530100 | 5264400 | 2529600  | 3383700 | 908690  | 2288100 | 2703200 |
| LIPID-P-0240 | DG(18:2_18:2)      | 甘油二酯_DG(18:2_18:2)     | GL      | 甘油酯类   | DG       | 甘油二酯   | C39H68O5  | 1837200 | 982720  | 1979800  | 1765500 | 2524600 | 1867500  | 1615000 | 1590000 | 1418700 | 2427500 | 5402800  | 4613500 | 2521000 | 7598000 | 4006300 |
| LIPID-P-0241 | DG(16:1_20:3)      | 甘油二酯_DG(16:1_20:3)     | GL      | 甘油酯类   | DG       | 甘油二酯   | C39H68O5  | 195580  | 62774   | 237580   | 128920  | 149280  | 108880   | 59135   | 69179   | 65755   | 102400  | 67762    | 47681   | 12767   | 46633   | 56622   |
| LIPID-P-0242 | DG(18:1_20:3)      | 甘油二酯_DG(18:1_20:3)     | GL      | 甘油酯类   | DG       | 甘油二酯   | C41H72O5  | 405480  | 430270  | 709650   | 646680  | 605240  | 476320   | 204780  | 543840  | 464840  | 754170  | 590950   | 400570  | 167740  | 529110  | 433980  |
| LIPID-P-0243 | DG(18:0_20:4)      | 甘油二酯_DG(18:0_20:4)     | GL      | 甘油酯类   | DG       | 甘油二酯   | C41H72O5  | 5229100 | 7637900 | 6702900  | 7471000 | 7226900 | 4095400  | 3809900 | 3353200 | 3368700 | 5361200 | 7121900  | 5838100 | 1996000 | 5708000 | 5548600 |
| LIPID-P-0244 | DG(18:1_20:3)      | 甘油二酯_DG(18:1_20:3)     | GL      | 甘油酯类   | DG       | 甘油二酯   | C41H72O5  | 27815   | 41256   | 61833    | 68373   | 36115   | 59339    | 37152   | 48829   | 45179   | 31222   | 69242    | 45276   | 41167   | 45726   | 59019   |
| LIPID-P-0245 | DG(18:1_22:3)      | 甘油二酯_DG(18:1_22:3)     | GL      | 甘油酯类   | DG       | 甘油二酯   | C43H76O5  | 160140  | 146810  | 559280   | 288330  | 186550  | 169730   | 83918   | 102340  | 100170  | 122350  | 64010    | 44471   | 20445   | 63080   | 43672   |
| LIPID-P-0246 | DG(18:2_18:3)      | 甘油二酯_DG(18:2_18:3)     | GL      | 甘油酯类   | DG       | 甘油二酯   | C39H66O5  | 145970  | 205750  | 958120   | 251670  | 196730  | 400490   | 408190  | 379090  | 263630  | 508380  | 899470   | 503280  | 333810  | 1162200 | 469100  |
| LIPID-P-0248 | DG(16:1_20:4)      | 甘油二酯_DG(16:1_20:4)     | GL      | 甘油酯类   | DG       | 甘油二酯   | C39H66O5  | 1045800 | 809270  | 1937800  | 757030  | 741180  | 701440   | 490410  | 552870  | 543780  | 624060  | 727660   | 355480  | 223910  | 636820  | 441750  |
| LIPID-P-0250 | DG(17:1_20:4)      | 甘油二酯_DG(17:1_20:4)     | GL      | 甘油酯类   | DG       | 甘油二酯   | C40H68O5  | 24806   | 32065   | 87675    | 54459   | 43575   | 53401    | 59715   | 67440   | 25314   | 41853   | 26550    | 41429   | 11728   | 31513   | 28909   |
| LIPID-P-0251 | DG(18:2_20:3)      | 甘油二酯_DG(18:2_20:3)     | GL      | 甘油酯类   | DG       | 甘油二酯   | C41H70O5  | 213080  | 167560  | 452170   | 173500  | 221300  | 174970   | 186460  | 335380  | 101890  | 355330  | 604290   | 276350  | 168470  | 396500  | 397660  |
| LIPID-P-0252 | DG(18:1_20:4)      | 甘油二酯_DG(18:1_20:4)     | GL      | 甘油酯类   | DG       | 甘油二酯   | C41H70O5  | 7564300 | 6859300 | 13292000 | 8209300 | 5731800 | 10312000 | 6848000 | 6154800 | 4947600 | 6196600 | 7643700  | 7989100 | 3349600 | 7818000 | 6670500 |
| LIPID-P-0253 | DG(16:0_22:5)      | 甘油二酯_DG(16:0_22:5)     | GL      | 甘油酯类   | DG       | 甘油二酯   | C41H70O5  | 79193   | 70961   | 264710   | 85671   | 112420  | 93598    | 58442   | 103710  | 95923   | 131600  | 206430   | 259280  | 76501   | 191690  | 219950  |
| LIPID-P-0256 | DG(18:0_22:5)      | 甘油二酯_DG(18:0_22:5)     | GL      | 甘油酯类   | DG       | 甘油二酯   | C43H74O5  | 13412   | 12589   | 20971    | 22669   | 13760   | 18954    | 8859.4  | 11641   | 11653   | 15751   | 22163    | 34103   | 18697   | 21759   | 26596   |
| LIPID-P-0257 | DG(18:1_22:4)      | 甘油二酯_DG(18:1_22:4)     | GL      | 甘油酯类   | DG       | 甘油二酯   | C43H74O5  | 242330  | 280540  | 1531000  | 398430  | 438000  | 62410    | 296840  | 329630  | 437010  | 399870  | 640890   | 474160  | 268030  | 595740  | 395990  |
| LIPID-P-0259 | DG(18:2_20:4)      | 甘油二酯_DG(18:2_20:4)     | GL      | 甘油酯类   | DG       | 甘油二酯   | C41H68O5  | 2086400 | 1026400 | 742180   | 1339600 | 1300200 | 964880   | 1421600 | 934680  | 1149100 | 2884100 | 4240500  | 1362600 | 3746200 | 4307400 |         |
| LIPID-P-0260 | DG(18:1_20:5)      | 甘油二酯_DG(18:1_20:5)     | GL      | 甘油酯类   | DG       | 甘油二酯   | C41H68O5  | 94521   | 73905   | 259330   | 120880  | 142480  | 83956    | 54644   | 72766   | 58903   | 78439   | 262880   | 95578   | 108510  | 129880  | 146780  |
| LIPID-P-0261 | DG(16:0_22:6)      | 甘油二酯_DG(16:0_22:6)     | GL      | 甘油酯类   | DG       | 甘油二酯   | C41H68O5  | 1850700 | 5509200 | 7253900  | 4047400 | 5091800 | 4807900  | 2666700 | 4339200 | 5029500 | 2959900 | 2287300  | 1594000 | 2943400 | 3304600 |         |
| LIPID-P-0262 | DG(16:1_22:5)      | 甘油二酯_DG(16:1_22:5)     | GL      | 甘油酯类   | DG       | 甘油二酯   | C41H68O5  | 125069  | 435300  | 660940   | 225540  | 577220  | 386650   | 236020  | 344300  | 233390  | 356600  | 221760   | 243890  | 105370  | 325200  | 393140  |
| LIPID-P-0264 | DG(18:2_22:4)      | 甘油二酯_DG(18:2_22:4)     | GL      | 甘油酯类   | DG       | 甘油二酯   | C43H72O5  | 92099   | 67500   | 443370   | 67597   | 100390  | 55869    | 60535   | 141630  | 95066   | 100180  | 429840   | 220010  | 204030  | 276990  | 364550  |
| LIPID-P-0265 | DG(18:1_22:5)      | 甘油二酯_DG(18:1_22:5)     | GL      | 甘油酯类   | DG       | 甘油二酯   | C43H72O5  | 128240  | 128390  | 394800   | 135580  | 185910  | 166630   | 89462   | 125110  | 92052   | 88495   | 333450   | 218200  | 86909   | 217970  | 313720  |
| LIPID-P-0266 | DG(18:0_22:6)      | 甘油二酯_DG(18:0_22:6)     | GL      | 甘油酯类   | DG       | 甘油二酯   | C43H72O5  | 2959570 | 6297740 | 501560   | 866330  | 1084100 | 621280   | 440110  | 646680  | 403690  | 414130  | 540030   | 552950  | 210040  | 487500  | 384750  |
| LIPID-P-0267 | DG(20:0_22:6)      | 甘油二酯_DG(20:0_22:6)     | GL      | 甘油酯类   | DG       | 甘油二酯   | C45H76O5  | 10757   | 5914.6  | 9050.4   | 2870.1  | 8737.4  | 11348    | 3855.8  | 5876.5  | 5251.6  | 4910.4  | 8207.2   | 11191   | 4915.1  | 10396   | 14162   |
| LIPID-P-0268 | DG(16:1_22:6)      | 甘油二酯_DG(16:1_22:6)     | GL      | 甘油酯类   | DG       | 甘油二酯   | C41H66O5  | 381710  | 294880  | 2052400  | 693800  | 753320  | 618420   | 374440  | 549350  | 286640  | 613960  | 761450   | 359510  | 498860  | 472350  | 751970  |
| LIPID-P-0269 | DG(18:1_22:6)      | 甘油二酯_DG(18:1_22:6)     | GL      | 甘油酯类   | DG       | 甘油二酯   | C43H70O5  | 4225400 | 3575200 | 1741700  | 5880800 | 6393300 | 5127700  | 2439100 | 3107600 | 5628200 | 5232800 | 11704000 | 6445500 | 6168000 | 8962900 | 5660400 |
| LIPID-P-0270 | DG(18:2_22:5)      | 甘油二酯_DG(18:2_22:5)     | GL      | 甘油酯类   | DG       | 甘油二酯   | C43H70O5  | 54523   | 619570  | 52297    | 30996   | 54089   | 77633    | 57856   | 78764   | 114550  | 117060  | 144690   | 88835   | 130460  | 147120  |         |
| LIPID-P-0271 | DG(18:2_22:6)      | 甘油二酯_DG(18:2_22:6)     | GL      | 甘油酯类   | DG       | 甘油二酯   | C43H68O5  | 1231100 | 627510  | 6349700  | 953660  | 1114400 | 1161700  | 1241600 | 1041300 | 1489100 | 1306600 | 7723500  | 2533700 | 3716400 | 5537400 | 5256600 |
| LIPID-P-0274 | MG(16:0)           | 单甘油酯_MG(16:0)          | GL      | 甘油酯类   | MG       | 单甘油酯   | C19H38O4  | 240920  | 185960  | 409300   | 223040  | 205000  | 194830   | 325210  | 192740  | 232010  | 191340  | 231040   | 246160  | 266750  | 251220  | 225000  |
| LIPID-P-0276 | MG(18:0)           | 单甘油酯_MG(18:0)          | GL      | 甘油酯类   | MG       | 单甘油酯   | C21H42O4  | 168150  | 147150  | 518300   | 177690  | 199390  | 179440   | 204920  | 168850  | 227690  | 161780  | 198330   | 190660  | 234140  | 188130  | 194980  |
| LIPID-P-0282 | MG(18:1)           | 单甘油酯_MG(18:1)          | GL      | 甘油酯类   | MG       | 单甘油酯   | C21H40O4  | 44203   | 51157   | 292040   | 222360  | 47568   | 50271    | 96378   | 56794   | 131050  | 61140   | 307280   | 154650  | 277530  | 177680  | 135010  |
| LIPID-P-0283 | MG(18:2)           | 单甘油酯_MG(18:2)          | GL      | 甘油酯类   | MG       | 单甘油酯   | C21H38O4  | 36021   | 86006.6 | 56133    | 10689   | 55425   | 4996.9   | 14323   | 9435.2  | 16077   | 6758.8  | 88507    | 48902   | 65613   | 52279   | 43209   |
| LIPID-P-0292 | HexCer(d18:1/16:0) | 糖鞘脂_HexCer(d18:1/16:0) | SL      | 鞘脂类    | HexCer   | 糖鞘脂    | C40H77NO8 | 174330  | 395640  | 242640   | 182340  | 397830  | 301400   | 335040  | 359700  | 240140  | 282470  | 720470   | 224480  | 394600  | 297120  | 455650  |
| LIPID-P-0293 | HexCer(d18:1/17:0) | 糖鞘脂_HexCer(d18:1/17:0) | SL      | 鞘脂类    | HexCer   | 糖鞘脂    | C41H79NO8 | 12202   | 11682   | 12680    | 40038   | 24659   | 55044    | 47084   | 51144   | 11627   | 47737   | 25669    | 71550   | 52945   | 95477   | 19547   |
| LIPID-P-0294 | HexCer(d18:1/18:0) | 糖鞘脂_HexCer(d18:1/18:0) | SL      | 鞘脂类    | HexCer   | 糖鞘脂    | C42H81NO8 | 31651   | 116190  | 145910   | 121080  | 60838   | 66150    | 30555   | 15176   | 75617   | 28990   | 45837    | 23969   | 36318   | 24396   | 15783   |
| LIPID-P-0296 | HexCer(d18:1/20:0) | 糖鞘脂_HexCer(d18:1/20:0) | SL      | 鞘脂类    | HexCer   | 糖鞘脂    | C44H85NO8 | 135760  | 165970  | 69417    | 181340  | 77130   | 205800   | 236810  | 106430  | 259660  | 189670  | 80825    | 92200   | 190230  | 145470  | 142270  |
| LIPID-P-0297 | HexCer(d18:1/22:0) | 糖鞘脂_HexCer(d18:1/22:0) | SL      | 鞘脂类    | HexCer   | 糖鞘脂    | C46H89NO8 | 750960  | 488800  | 321970   | 763060  | 532750  | 439310   | 557850  | 449850  | 545460  | 594150  | 690120   | 557570  | 382920  | 525160  | 309690  |
| LIPID-P-0298 | HexCer(d18:1/23:0) | 糖鞘脂_HexCer(d18:1/23:0) | SL      | 鞘脂类    | HexCer   | 糖鞘脂    | C47H91NO8 | 119480  | 78514   | 388950   | 175130  | 538750  | 167970   | 295040  | 248460  | 422410  | 110670  | 120230   | 89722   | 199230  | 132960  | 101550  |
| LIPID-P-0299 | HexCer(d18:1/24:0) | 糖鞘脂_HexCer(d18:1/24:0) | SL      | 鞘脂类    | HexCer   | 糖鞘脂    | C48H93NO8 | 116750  | 132220  | 635400   | 334310  | 231210  | 204310   | 323310  | 457850  | 288080  | 158540  | 381340   | 360630  | 517410  | 944640  | 377950  |
| LIPID-P-0300 | HexCer(d18:1/25:0) | 糖鞘脂_HexCer(d18:1/25:0) | SL      | 鞘脂类    | HexCer   | 糖鞘脂    | C49H95NO8 | 14543   | 18806   | 10838    | 13754   | 17836   | 10166    | 34127   | 10981   | 7407.2  | 8471.3  | 12210    | 12027   | 6593.9  | 37762   | 15332   |
| LIPID-P-0302 | HexCer(d18:1/16:1) | 糖鞘脂_HexCer(d18:1/16:1) | SL      | 鞘脂类    | HexCer   | 糖鞘脂    | C40H75NO8 | 96524   | 116450  | 754740   | 87250   | 85134   | 98522    | 78849   | 133090  | 96632   | 99623   | 98492    | 102170  | 100900  | 87709   | 78433   |
| LIPID-P-0303 | HexCer(d18:1/18:1) | 糖鞘脂_HexCer(d18:1/18:1) | SL      | 鞘脂类    | HexCer   | 糖鞘脂    | C42H79NO8 | 12988   | 13667   | 12598    | 9831.2  | 14837   | 17109    | 4639.4  | 17235   | 14256   | 7465.4  | 19153    | 9981.8  | 10502   | 9515.1  |         |
| LIPID-P-0304 | HexCer(d18:1/20:1) | 糖鞘脂_HexCer(d18:1/20:1) | SL      | 鞘脂类    | HexCer   | 糖鞘脂    | C44H83NO8 | 7423.8  | 13930   | 77778    | 12975   | 9401.7  | 13826    | 15124   | 10810   | 13709   | 12728   | 11490    | 17132   | 14043   | 9717.2  | 8614.5  |
| LIPID-P-0305 | HexCer(d18:1/22:1) | 糖鞘脂_HexCer(d18:1/22:1) | SL      | 鞘脂类    | HexCer   | 糖鞘脂    | C46H87NO8 | 12758   | 20870   | 133060   | 21490   | 15386   | 18353    | 20486   | 26083   | 20293   | 21350   | 14728    | 23394   | 27357   | 17734   | 22176   |
| LIPID-P-0306 | HexCer(d18:1/24:1) | 糖鞘脂_HexCer(d18:1/24:1) | SL      | 鞘脂类    | HexCer   | 糖鞘脂    | C48H91NO8 | 12821   | 28335   | 157800   | 17601   | 18496   | 24786    | 19426   | 27670   | 17454   | 28070   | 30176    | 17940   | 2523    |         |         |

| Index        | Compounds      | 物质                     | Class I | 物质一级分类 | Class II | 物质二级分类   | Formula    | ND1      | ND2      | ND3      | ND4      | ND5      | HF1      | HF2      | HF3      | HF4      | HF5      | AST-H1   | AST-H2   | AST-H3   | AST-H4   | AST-H5   |
|--------------|----------------|------------------------|---------|--------|----------|----------|------------|----------|----------|----------|----------|----------|----------|----------|----------|----------|----------|----------|----------|----------|----------|----------|
| LIPID-P-0377 | LPC(24:0/18:2) | 溶血磷脂酰胆碱 LPC(24:1/0:0)  | GP      | 甘油磷脂类  | LPC      | 溶血磷脂酰胆碱  | C22H64NO7P | 18826    | 37783    | 57442    | 47560    | 25875    | 28264    | 20881    | 18670    | 18333    | 24455    | 48777    | 34373    | 30812    | 56872    | 25047    |
| LIPID-P-0378 | LPC(0:0/18:2)  | 溶血磷脂酰胆碱 LPC(0:0/18:2)  | GP      | 甘油磷脂类  | LPC      | 溶血磷脂酰胆碱  | C26H50NO7P | 10626000 | 12755000 | 13664000 | 14416000 | 9793200  | 13719000 | 19398000 | 8995500  | 23156000 | 13122000 | 20140000 | 27254000 | 42455000 | 19850000 | 23600000 |
| LIPID-P-0381 | LPC(20:2/0:0)  | 溶血磷脂酰胆碱 LPC(20:2/0:0)  | GP      | 甘油磷脂类  | LPC      | 溶血磷脂酰胆碱  | C28H54NO7P | 19983000 | 13362000 | 14339000 | 22430000 | 11195000 | 18033000 | 22166000 | 9121200  | 28060000 | 14196000 | 13532000 | 18164000 | 25400000 | 13300000 | 16043000 |
| LIPID-P-0382 | LPC(22:2/0:0)  | 溶血磷脂酰胆碱 LPC(22:2/0:0)  | GP      | 甘油磷脂类  | LPC      | 溶血磷脂酰胆碱  | C30H58NO7P | 103210   | 114910   | 316220   | 171470   | 84409    | 100630   | 146330   | 197580   | 104630   | 239550   | 223050   | 372960   | 172110   | 198980   |          |
| LIPID-P-0384 | LPC(20:3/0:0)  | 溶血磷脂酰胆碱 LPC(20:3/0:0)  | GP      | 甘油磷脂类  | LPC      | 溶血磷脂酰胆碱  | C28H52NO7P | 26590000 | 29592000 | 23082000 | 35837000 | 24980000 | 33552000 | 32449000 | 21233000 | 40375000 | 29310000 | 25370000 | 33920000 | 43226000 | 26841000 | 32819000 |
| LIPID-P-0385 | LPC(18:4/0:0)  | 溶血磷脂酰胆碱 LPC(18:4/0:0)  | GP      | 甘油磷脂类  | LPC      | 溶血磷脂酰胆碱  | C26H46NO7P | 243270   | 572290   | 393270   | 707190   | 409830   | 565100   | 461850   | 346040   | 495890   | 485500   | 588620   | 691760   | 946150   | 487130   | 586710   |
| LIPID-P-0386 | LPC(20:4/0:0)  | 溶血磷脂酰胆碱 LPC(20:4/0:0)  | GP      | 甘油磷脂类  | LPC      | 溶血磷脂酰胆碱  | C28H50NO7P | 13948000 | 29041000 | 24785000 | 32657000 | 23395000 | 32409000 | 31814000 | 19660000 | 37749000 | 26574000 | 31986000 | 30271000 | 38416000 | 30265000 | 28680000 |
| LIPID-P-0387 | LPC(0:0/22:4)  | 溶血磷脂酰胆碱 LPC(0:0/22:4)  | GP      | 甘油磷脂类  | LPC      | 溶血磷脂酰胆碱  | C30H54NO7P | 9683800  | 8787000  | 17600000 | 10355000 | 7406000  | 14251000 | 15268000 | 8323100  | 21553000 | 11589000 | 15589000 | 15381000 | 22367000 | 13945000 | 14221000 |
| LIPID-P-0389 | LPC(20:5/0:0)  | 溶血磷脂酰胆碱 LPC(20:5/0:0)  | GP      | 甘油磷脂类  | LPC      | 溶血磷脂酰胆碱  | C28H48NO7P | 10147000 | 23542000 | 20547000 | 33037000 | 17918000 | 16031000 | 19455000 | 11899000 | 25570000 | 14581000 | 20685000 | 27462000 | 49636000 | 17423000 | 24363000 |
| LIPID-P-0390 | LPC(0:0/22:5)  | 溶血磷脂酰胆碱 LPC(0:0/22:5)  | GP      | 甘油磷脂类  | LPC      | 溶血磷脂酰胆碱  | C30H52NO7P | 23932000 | 39462000 | 37068000 | 49907000 | 32585000 | 41072000 | 53443000 | 26918000 | 65427000 | 39538000 | 60398000 | 67599000 | 81795000 | 53540000 | 61309000 |
| LIPID-P-0392 | LPC(22:6/0:0)  | 溶血磷脂酰胆碱 LPC(22:6/0:0)  | GP      | 甘油磷脂类  | LPC      | 溶血磷脂酰胆碱  | C30H50NO7P | 50019000 | 68234000 | 63390000 | 75780000 | 62994000 | 65044000 | 73730000 | 53030000 | 77608000 | 66567000 | 80676000 | 80198000 | 86345000 | 77808000 | 81028000 |
| LIPID-P-0393 | LPC(0:14/0)    | 溶血磷脂酰胆碱 LPC(0:14/0)    | GP      | 甘油磷脂类  | LPC-O    | 溶血磷脂酰胆碱  | C22H48NO6P | 15493    | 36962    | 66959    | 33922    | 33483    | 25407    | 14922    | 24647    | 95772    | 23407    | 38466    | 26491    | 26732    | 34063    | 29509    |
| LIPID-P-0394 | LPC(0:16/0)    | 溶血磷脂酰胆碱 LPC(0:16/0)    | GP      | 甘油磷脂类  | LPC-O    | 溶血磷脂酰胆碱  | C24H52NO6P | 2838900  | 4310200  | 8338200  | 4556100  | 3519300  | 3907000  | 2848400  | 3090800  | 2843700  | 3619300  | 6015100  | 5352800  | 5084900  | 4417000  | 4387200  |
| LIPID-P-0395 | LPC(0:18/0)    | 溶血磷脂酰胆碱 LPC(0:18/0)    | GP      | 甘油磷脂类  | LPC-O    | 溶血磷脂酰胆碱  | C26H56NO6P | 175280   | 265970   | 620440   | 305330   | 231400   | 253110   | 211980   | 197930   | 215580   | 230670   | 417140   | 388230   | 482770   | 309140   | 341860   |
| LIPID-P-0396 | LPC(0:20/0)    | 溶血磷脂酰胆碱 LPC(0:20/0)    | GP      | 甘油磷脂类  | LPC-O    | 溶血磷脂酰胆碱  | C28H60NO6P | 45181    | 69573    | 196820   | 90736    | 67996    | 83708    | 81767    | 62703    | 81772    | 77327    | 110310   | 124430   | 170670   | 94158    | 114770   |
| LIPID-P-0397 | LPC(0:22/0)    | 溶血磷脂酰胆碱 LPC(0:22/0)    | GP      | 甘油磷脂类  | LPC-O    | 溶血磷脂酰胆碱  | C30H64NO6P | 22285    | 35099    | 116860   | 44734    | 27262    | 30397    | 39161    | 32253    | 41007    | 37160    | 58363    | 65382    | 31605    | 34015    |          |
| LIPID-P-0399 | LPC(0:16:1)    | 溶血磷脂酰胆碱 LPC(0:16:1)    | GP      | 甘油磷脂类  | LPC-O    | 溶血磷脂酰胆碱  | C24H50NO6P | 90891    | 307070   | 404630   | 358020   | 205090   | 141230   | 132780   | 108160   | 135070   | 127730   | 405550   | 262980   | 555440   | 242680   | 240360   |
| LIPID-P-0400 | LPC(0:18:1)    | 溶血磷脂酰胆碱 LPC(0:18:1)    | GP      | 甘油磷脂类  | LPC-O    | 溶血磷脂酰胆碱  | C26H54NO6P | 2517400  | 5043600  | 5360800  | 3478000  | 3626200  | 2989100  | 2546800  | 2706700  | 3354000  | 8339300  | 5296200  | 5645400  | 5941900  | 4230600  |          |
| LIPID-P-0401 | LPC(0:20:1)    | 溶血磷脂酰胆碱 LPC(0:20:1)    | GP      | 甘油磷脂类  | LPC-O    | 溶血磷脂酰胆碱  | C28H58NO6P | 9803.3   | 18364    | 32278    | 21999    | 12198    | 10189    | 993.6    | 10365    | 9355.9   | 12669    | 23219    | 25701    | 27736    | 18515    | 21134    |
| LIPID-P-0402 | LPC(0:22:1)    | 溶血磷脂酰胆碱 LPC(0:22:1)    | GP      | 甘油磷脂类  | LPC-O    | 溶血磷脂酰胆碱  | C30H62NO6P | 9        | 3981.6   | 3904.4   | 7763.6   | 3743.2   | 2902.5   | 3194.8   | 2209     | 3150.9   | 4035.8   | 9265.2   | 11711    | 13038    | 9841.5   | 9631.6   |
| LIPID-P-0403 | LPC(0:18:2)    | 溶血磷脂酰胆碱 LPC(0:18:2)    | GP      | 甘油磷脂类  | LPC-O    | 溶血磷脂酰胆碱  | C26H52NO6P | 62049    | 102320   | 299450   | 107520   | 73284    | 99006    | 69744    | 57345    | 62290    | 85077    | 472210   | 312810   | 341760   | 341490   | 257730   |
| LIPID-P-0404 | LPC(0:20:2)    | 溶血磷脂酰胆碱 LPC(0:20:2)    | GP      | 甘油磷脂类  | LPC-O    | 溶血磷脂酰胆碱  | C28H56NO6P | 15337    | 34087    | 89352    | 34327    | 21836    | 33387    | 21290    | 24012    | 16298    | 57299    | 122270   | 76813    | 100400   | 91624    | 69150    |
| LIPID-P-0406 | LPC(0:20:3)    | 溶血磷脂酰胆碱 LPC(0:20:3)    | GP      | 甘油磷脂类  | LPC-O    | 溶血磷脂酰胆碱  | C28H54NO6P | 73145    | 8448.9   | 13924    | 7416.6   | 6967.5   | 7891.9   | 4581.4   | 3763.1   | 5943.3   | 3673.4   | 17515    | 9974.4   | 14563    | 12949    | 17603    |
| LIPID-P-0410 | LPE(0:0/18:0)  | 溶血磷脂酰乙醇胺 LPE(0:0/18:0) | GP      | 甘油磷脂类  | LPE      | 溶血磷脂酰乙醇胺 | C23H48NO7P | 1304000  | 6777700  | 2974200  | 75426000 | 3346000  | 3053400  | 1896200  | 2892700  | 1909700  | 3622700  | 7177000  | 8674600  | 7984200  | 4735200  | 7606600  |
| LIPID-P-0411 | LPE(18:0/0:0)  | 溶血磷脂酰乙醇胺 LPE(18:0/0:0) | GP      | 甘油磷脂类  | LPE      | 溶血磷脂酰乙醇胺 | C23H48NO7P | 13324000 | 7051000  | 2908600  | 7720900  | 3278000  | 3269400  | 1905400  | 2829400  | 1860000  | 3673100  | 7290200  | 8640300  | 7917500  | 4668800  | 7027200  |
| LIPID-P-0412 | LPE(20:0/0:0)  | 溶血磷脂酰乙醇胺 LPE(20:0/0:0) | GP      | 甘油磷脂类  | LPE      | 溶血磷脂酰乙醇胺 | C25H52NO7P | 91781    | 21108    | 133640   | 31756    | 11305    | 131400   | 66155    | 129840   | 58773    | 156280   | 276660   | 470200   | 337600   | 168560   | 406900   |
| LIPID-P-0413 | LPE(22:0/0:0)  | 溶血磷脂酰乙醇胺 LPE(22:0/0:0) | GP      | 甘油磷脂类  | LPE      | 溶血磷脂酰乙醇胺 | C27H56NO7P | 5607.5   | 11616    | 34160    | 20437    | 6889.3   | 6187.9   | 7136.1   | 8092.5   | 5823.7   | 11670    | 15161    | 21674    | 15752    | 14615    | 19952    |
| LIPID-P-0414 | LPE(24:0/0:0)  | 溶血磷脂酰乙醇胺 LPE(24:0/0:0) | GP      | 甘油磷脂类  | LPE      | 溶血磷脂酰乙醇胺 | C29H60NO7P | 4977.6   | 12350    | 23594    | 57041    | 9        | 3875.5   | 9        | 6281.9   | 9        | 2760.5   | 15203    | 12749    | 10336    | 11908    | 6832.7   |
| LIPID-P-0415 | LPE(16:1/0:0)  | 溶血磷脂酰乙醇胺 LPE(16:1/0:0) | GP      | 甘油磷脂类  | LPE      | 溶血磷脂酰乙醇胺 | C23H48NO7P | 254870   | 1952600  | 2222000  | 1717700  | 1233600  | 865520   | 355980   | 572760   | 328230   | 1069700  | 1600900  | 1665400  | 1828500  | 1078100  | 1412500  |
| LIPID-P-0419 | LPE(0:0/20:1)  | 溶血磷脂酰乙醇胺 LPE(0:0/20:1) | GP      | 甘油磷脂类  | LPE      | 溶血磷脂酰乙醇胺 | C25H50NO7P | 192110   | 181150   | 262580   | 382890   | 117730   | 178580   | 145400   | 89152    | 193940   | 149010   | 150620   | 194770   | 231630   | 124330   | 174100   |
| LIPID-P-0420 | LPE(20:1/0:0)  | 溶血磷脂酰乙醇胺 LPE(20:1/0:0) | GP      | 甘油磷脂类  | LPE      | 溶血磷脂酰乙醇胺 | C25H50NO7P | 325890   | 1372400  | 1136000  | 2017800  | 576390   | 973750   | 844420   | 626750   | 485000   | 945100   | 1539400  | 2129900  | 2080700  | 1034000  | 1650200  |
| LIPID-P-0423 | LPE(0:0/18:2)  | 溶血磷脂酰乙醇胺 LPE(0:0/18:2) | GP      | 甘油磷脂类  | LPE      | 溶血磷脂酰乙醇胺 | C23H44NO7P | 4721500  | 5040800  | 7823700  | 6197300  | 3562000  | 5501300  | 5508400  | 3769400  | 7278000  | 5249300  | 10384000 | 13908000 | 2128000  | 9444000  | 12578000 |
| LIPID-P-0424 | LPE(18:2/0:0)  | 溶血磷脂酰乙醇胺 LPE(18:2/0:0) | GP      | 甘油磷脂类  | LPE      | 溶血磷脂酰乙醇胺 | C23H44NO7P | 762810   | 2114600  | 1794200  | 2081700  | 1198400  | 1199700  | 1080600  | 886040   | 1270700  | 1176800  | 3499900  | 4063400  | 4868700  | 2156300  | 3318400  |
| LIPID-P-0425 | LPE(0:0/20:2)  | 溶血磷脂酰乙醇胺 LPE(0:0/20:2) | GP      | 甘油磷脂类  | LPE      | 溶血磷脂酰乙醇胺 | C25H48NO7P | 84279    | 113130   | 377610   | 175360   | 65738    | 132300   | 127960   | 98457    | 229140   | 125560   | 219100   | 322770   | 387810   | 170110   | 240390   |
| LIPID-P-0426 | LPE(20:2/0:0)  | 溶血磷脂酰乙醇胺 LPE(20:2/0:0) | GP      | 甘油磷脂类  | LPE      | 溶血磷脂酰乙醇胺 | C25H48NO7P | 64234    | 223450   | 314210   | 244460   | 95651    | 160610   | 125330   | 138880   | 126410   | 160230   | 366110   | 529800   | 401850   | 249930   | 430470   |
| LIPID-P-0429 | LPE(0:0/20:3)  | 溶血磷脂酰乙醇胺 LPE(0:0/20:3) | GP      | 甘油磷脂类  | LPE      | 溶血磷脂酰乙醇胺 | C25H46NO7P | 293600   | 3521100  | 3409100  | 4903300  | 2439900  | 3694900  | 2639700  | 2793400  | 3548800  | 3403300  | 3145900  | 4687300  | 5301500  | 2907100  | 4392400  |
| LIPID-P-0431 | LPE(22:3/0:0)  | 溶血磷脂酰乙醇胺 LPE(22:3/0:0) | GP      | 甘油磷脂类  | LPE      | 溶血磷脂酰乙醇胺 | C27H50NO7P | 30396    | 30311    | 87723    | 37429    | 26932    | 51783    | 55167    | 37218    | 61832    | 50266    | 90309    | 73030    | 89855    | 80463    | 70300    |
| LIPID-P-0433 | LPE(22:4/0:0)  | 溶血磷脂酰乙醇胺 LPE(22:4/0:0) | GP      | 甘油磷脂类  | LPE      | 溶血磷脂酰乙醇胺 | C27H48NO7P | 80550    | 750220   | 1888000  | 836740   | 543630   | 1145200  | 1184100  | 749760   | 1618700  | 1214300  | 1977100  | 1732400  | 1998300  | 1841100  | 1662600  |
| LIPID-P-0434 | LPE(20:5/0:0)  | 溶血磷脂酰乙醇胺 LPE(20:5/0:0) | GP      | 甘油磷脂类  | LPE      | 溶血磷脂酰乙醇胺 | C25H42NO7P | 202330   | 469480   | 349250   | 651620   | 299330   | 267110   | 287300   | 237550   | 344310   | 285490   | 436200   | 544460   | 571750   | 341720   | 390800   |
| LIPID-P-0435 | LPE(0:0/22:5)  | 溶血磷脂酰乙醇胺 LPE(0:0/22:5) | GP      | 甘油磷脂类  | LPE      | 溶血磷脂酰乙醇胺 | C27H46NO7P | 887030   | 1000700  | 1582800  | 993770   | 685130   | 1332700  | 1262700  | 1143300  | 1607700  | 1166300  | 3247600  | 4046500  | 4242500  | 2649700  | 4101400  |
| LIPID-P-0438 | LPE(P-16/0)    | 溶血磷脂酰乙醇胺 LPE(P-16/0)   | GP      | 甘油磷脂类  | LPE-P    | 溶血磷脂酰乙醇胺 | C21H44NO6P | 211740   | 1182900  | 2013400  | 1436500  | 497590   | 451220   | 257940   | 288260   | 331610   | 363870   | 2143800  | 990680   | 2301100  | 1433600  | 892630   |
| LIPID-P-0439 | LPE(P-17/0)    | 溶血磷脂酰乙醇胺 LPE(P-17/0)   | GP      | 甘油磷脂类  | LPE-P    | 溶血磷脂酰乙醇胺 | C22H46NO6P | 6642.8   | 40263    | 82446    | 49736    | 17066    | 29463    | 18104    | 19936    | 24434    | 23698    | 104600   | 64240    | 111520   | 53685    | 50526    |
| LIPID-P-0440 | LPE(P-18/0)    | 溶血磷脂酰乙醇胺 LPE(P-18/0)   | GP      | 甘油磷脂类  | LPE-P    | 溶血磷脂酰乙醇胺 | C23H48NO6P | 36729    | 256030   | 403000   | 366500   | 116850   | 169710   | 101250   | 120780   | 133430   | 151670   | 161640   | 902530   | 512540   | 364600   | 414630   |
| LIPID-P-0441 | LPE(P-20/0)    | 溶血磷脂酰乙醇胺 LPE(P-20/0)   | GP      | 甘油磷脂类  | LPE-P    | 溶血磷脂酰乙醇胺 | C25H52NO6P | 8446.3   | 36423    | 71091    | 60477    | 21565    | 31857    | 24606    | 24758    | 33199    | 28981    | 74117    | 79671    | 149690   | 53477    | 61774    |
| LIPID-P-0442 | LPE(P-22/0)    | 溶血磷脂酰乙醇胺 LPE(P-22/0)   | GP      | 甘油磷脂类  | LPE-P    | 溶血磷脂酰乙醇胺 | C27H56NO6P | 9        | 9        | 9        | 9        | 9        | 9        | 9        | 9        | 9        | 9        | 9        | 9        | 9        | 9        | 9        |
| LIPID-P-0445 | LPE(P-18:1)    | 溶血磷脂酰乙醇胺 LPE(P-18:1)   | GP      | 甘油磷脂类  | LPE-P    | 溶血磷脂酰乙醇胺 | C23H46NO6P | 44077    | 462630   | 636170   | 505100   | 188560   | 108840   | 65690    | 75866    | 81293    | 85498    | 588900   | 248670   | 540320   | 292580   | 214620   |
| LIPID-P-0446 | LPG(16:0/0:0)  | 溶血磷脂酰甘油 LPG(16:0/0:0)  | GP      | 甘油磷脂类  | LPG      |          |            |          |          |          |          |          |          |          |          |          |          |          |          |          |          |          |

| Index        | Compounds       | 物质                    | Class I | 物质一级分类 | Class II | 物质二级分类 | Formula    | ND1      | ND2      | ND3      | ND4      | ND5      | HF1      | HF2      | HF3      | HF4      | HF5      | AST-H1   | AST-H2   | AST-H3   | AST-H4   | AST-H5   |
|--------------|-----------------|-----------------------|---------|--------|----------|--------|------------|----------|----------|----------|----------|----------|----------|----------|----------|----------|----------|----------|----------|----------|----------|----------|
| LIPID-P-0487 | PC(18:1_22:0)   | 磷脂酰胆碱_PC(18:1_22:0)   | GP      | 甘油磷脂类  | PC       | 磷脂酰胆碱  | C48H94NO8P | 382240   | 348220   | 788780   | 437280   | 316610   | 305310   | 307670   | 271110   | 278140   | 245190   | 455430   | 255640   | 243420   | 501110   | 275220   |
| LIPID-P-0488 | PC(24:0_18:1)   | 磷脂酰胆碱_PC(24:0_18:1)   | GP      | 甘油磷脂类  | PC       | 磷脂酰胆碱  | C60H98NO8P | 187710   | 177210   | 477000   | 191980   | 139760   | 135370   | 141300   | 140140   | 108730   | 115550   | 180390   | 108560   | 82068    | 233830   | 116310   |
| LIPID-P-0489 | PC(14:0_18:2)   | 磷脂酰胆碱_PC(14:0_18:2)   | GP      | 甘油磷脂类  | PC       | 磷脂酰胆碱  | C40H76NO8P | 4156400  | 3267600  | 4255500  | 3617200  | 4275600  | 2730200  | 2386200  | 2958900  | 2471400  | 2675900  | 2205400  | 2126100  | 2616300  | 2099800  | 2138300  |
| LIPID-P-0490 | PC(16:0_18:2)   | 磷脂酰胆碱_PC(16:0_18:2)   | GP      | 甘油磷脂类  | PC       | 磷脂酰胆碱  | C42H80NO8P | 2517100  | 2448500  | 2637200  | 2165900  | 2502200  | 2401700  | 2796600  | 2657400  | 2833300  | 2736100  | 3245600  | 3855000  | 3658400  | 3449500  | 3660000  |
| LIPID-P-0491 | PC(17:1_18:1)   | 磷脂酰胆碱_PC(17:1_18:1)   | GP      | 甘油磷脂类  | PC       | 磷脂酰胆碱  | C43H82NO8P | 5827800  | 5362300  | 6431800  | 5084900  | 6124300  | 6682100  | 8925500  | 7525300  | 8895800  | 7792700  | 7503100  | 9033000  | 8899900  | 8454000  | 8549000  |
| LIPID-P-0492 | PC(18:0_18:2)   | 磷脂酰胆碱_PC(18:0_18:2)   | GP      | 甘油磷脂类  | PC       | 磷脂酰胆碱  | C44H84NO8P | 6837400  | 7952700  | 8009700  | 7904200  | 7478600  | 9032500  | 7942400  | 8115700  | 7378000  | 8961000  | 9958800  | 9414400  | 9349000  | 9825100  |          |
| LIPID-P-0493 | PC(19:0_18:2)   | 磷脂酰胆碱_PC(19:0_18:2)   | GP      | 甘油磷脂类  | PC       | 磷脂酰胆碱  | C45H86NO8P | 2556600  | 2468300  | 3585500  | 1858700  | 3083500  | 2020500  | 3025400  | 2641800  | 3237100  | 3023400  | 4547200  | 6499600  | 5279200  | 4485300  | 6170000  |
| LIPID-P-0494 | PC(18:0_20:2)   | 磷脂酰胆碱_PC(18:0_20:2)   | GP      | 甘油磷脂类  | PC       | 磷脂酰胆碱  | C46H88NO8P | 2157900  | 1482700  | 1627100  | 3257200  | 1683300  | 1847900  | 1227400  | 1422900  | 1125800  | 1364700  | 4564300  | 5050800  | 4239300  | 4696200  | 5032700  |
| LIPID-P-0495 | PC(18:1_22:1)   | 磷脂酰胆碱_PC(18:1_22:1)   | GP      | 甘油磷脂类  | PC       | 磷脂酰胆碱  | C48H92NO8P | 118770   | 62721    | 166250   | 49700    | 76766    | 64641    | 62103    | 74828    | 85527    | 62878    | 13414    | 182970   | 163270   | 180860   | 162130   |
| LIPID-P-0496 | PC(18:1_24:1)   | 磷脂酰胆碱_PC(18:1_24:1)   | GP      | 甘油磷脂类  | PC       | 磷脂酰胆碱  | C50H96NO8P | 119090   | 97540    | 225760   | 98857    | 128730   | 90506    | 109980   | 97513    | 111660   | 101240   | 188220   | 194500   | 223230   | 198920   |          |
| LIPID-P-0497 | PC(14:0_18:3)   | 磷脂酰胆碱_PC(14:0_18:3)   | GP      | 甘油磷脂类  | PC       | 磷脂酰胆碱  | C40H74NO8P | 521600   | 452030   | 742880   | 539310   | 564420   | 393810   | 436830   | 470580   | 364390   | 458460   | 454740   | 509250   | 669550   | 509380   | 420480   |
| LIPID-P-0498 | PC(16:0_18:3)   | 磷脂酰胆碱_PC(16:0_18:3)   | GP      | 甘油磷脂类  | PC       | 磷脂酰胆碱  | C42H78NO8P | 3989300  | 4605700  | 4933200  | 3148300  | 5337900  | 3803500  | 4354400  | 3656800  | 3923600  | 4980500  | 5073700  | 4499500  | 5422500  | 5618500  | 4980000  |
| LIPID-P-0499 | PC(17:1_18:2)   | 磷脂酰胆碱_PC(17:1_18:2)   | GP      | 甘油磷脂类  | PC       | 磷脂酰胆碱  | C43H80NO8P | 1172600  | 8045300  | 7601400  | 7017400  | 9061700  | 9946500  | 1284300  | 1257700  | 1269500  | 1135300  | 1025000  | 1257000  | 1321600  | 1033100  | 1174200  |
| LIPID-P-0500 | PC(16:0_20:3)   | 磷脂酰胆碱_PC(16:0_20:3)   | GP      | 甘油磷脂类  | PC       | 磷脂酰胆碱  | C44H82NO8P | 1465000  | 1290800  | 1024200  | 1360500  | 1326400  | 1217600  | 1163500  | 1194500  | 1139000  | 1135800  | 834030   | 1067900  | 1081100  | 932950   | 1115900  |
| LIPID-P-0501 | PC(17:0_20:3)   | 磷脂酰胆碱_PC(17:0_20:3)   | GP      | 甘油磷脂类  | PC       | 磷脂酰胆碱  | C45H84NO8P | 5756400  | 5867900  | 5841400  | 6998300  | 7322900  | 8272200  | 8577800  | 9791500  | 729500   | 8863100  | 4406200  | 5790400  | 4308600  | 5240400  | 5459100  |
| LIPID-P-0502 | PC(18:0_20:3)   | 磷脂酰胆碱_PC(18:0_20:3)   | GP      | 甘油磷脂类  | PC       | 磷脂酰胆碱  | C46H86NO8P | 2130100  | 283200   | 1024200  | 343300   | 285700   | 299600   | 2052200  | 2457500  | 1583200  | 244200   | 119000   | 1628200  | 1181200  | 1377900  | 1643900  |
| LIPID-P-0503 | PC(18:2_22:1)   | 磷脂酰胆碱_PC(18:2_22:1)   | GP      | 甘油磷脂类  | PC       | 磷脂酰胆碱  | C48H90NO8P | 123900   | 100790   | 988420   | 1237400  | 931430   | 992860   | 571290   | 831470   | 556310   | 819880   | 416900   | 662460   | 455050   | 437470   | 704640   |
| LIPID-P-0504 | PC(18:0_24:3)   | 磷脂酰胆碱_PC(18:0_24:3)   | GP      | 甘油磷脂类  | PC       | 磷脂酰胆碱  | C50H94NO8P | 101060   | 73943    | 277520   | 86125    | 119390   | 53741    | 90416    | 80664    | 66153    | 74686    | 119980   | 110550   | 74146    | 178820   | 104740   |
| LIPID-P-0505 | PC(14:0_24:0)   | 磷脂酰胆碱_PC(14:0_24:0)   | GP      | 甘油磷脂类  | PC       | 磷脂酰胆碱  | C42H76NO8P | 1021300  | 1202000  | 1420600  | 1100900  | 1615200  | 1161700  | 1247400  | 1172800  | 1194000  | 1254600  | 9822900  | 1032300  | 1036700  | 990140   | 951460   |
| LIPID-P-0506 | PC(15:0_20:4)   | 磷脂酰胆碱_PC(15:0_20:4)   | GP      | 甘油磷脂类  | PC       | 磷脂酰胆碱  | C43H78NO8P | 1181700  | 1270800  | 1666700  | 849400   | 1589700  | 1501900  | 2109000  | 1801800  | 2039100  | 2132100  | 2104400  | 1785800  | 1970700  | 2101100  | 1823700  |
| LIPID-P-0507 | PC(16:0_20:4)   | 磷脂酰胆碱_PC(16:0_20:4)   | GP      | 甘油磷脂类  | PC       | 磷脂酰胆碱  | C44H80NO8P | 3177400  | 3701100  | 3221000  | 2851200  | 3868900  | 3437300  | 3630900  | 3428000  | 3800800  | 3723400  | 3777000  | 3628000  | 3421100  | 4189700  | 3676000  |
| LIPID-P-0508 | PC(20:4_17:0)   | 磷脂酰胆碱_PC(20:4_17:0)   | GP      | 甘油磷脂类  | PC       | 磷脂酰胆碱  | C45H80NO8P | 1545000  | 2968300  | 2582900  | 2379000  | 3396600  | 3383600  | 4576400  | 4070100  | 4960300  | 4529000  | 5573300  | 5335600  | 5047100  | 5907000  | 5470500  |
| LIPID-P-0509 | PC(18:0_20:4)   | 磷脂酰胆碱_PC(18:0_20:4)   | GP      | 甘油磷脂类  | PC       | 磷脂酰胆碱  | C46H84NO8P | 1310800  | 1092900  | 1132200  | 1952200  | 1925500  | 1829000  | 1913300  | 1950000  | 1780100  | 1752800  | 1785600  | 1608000  | 1534000  | 1838000  | 1725900  |
| LIPID-P-0510 | PC(19:0_20:4)   | 磷脂酰胆碱_PC(19:0_20:4)   | GP      | 甘油磷脂类  | PC       | 磷脂酰胆碱  | C47H86NO8P | 3961200  | 4066700  | 7577700  | 3117700  | 5843200  | 4331500  | 5454400  | 6204500  | 5787100  | 6040400  | 9462700  | 9250900  | 7191600  | 9260500  | 9422500  |
| LIPID-P-0511 | PC(18:0_22:4)   | 磷脂酰胆碱_PC(18:0_22:4)   | GP      | 甘油磷脂类  | PC       | 磷脂酰胆碱  | C48H88NO8P | 2016100  | 1303100  | 1297500  | 1589900  | 1224600  | 1586700  | 1104300  | 1367800  | 1259600  | 1353600  | 1002000  | 9189400  | 7092900  | 1027800  | 9757800  |
| LIPID-P-0512 | PC(20:3_22:1)   | 磷脂酰胆碱_PC(20:3_22:1)   | GP      | 甘油磷脂类  | PC       | 磷脂酰胆碱  | C50H92NO8P | 161690   | 160510   | 266940   | 1227610  | 182690   | 203250   | 257110   | 209700   | 206270   | 226930   | 166540   | 226440   | 192990   | 180680   | 158920   |
| LIPID-P-0513 | PC(14:0_20:5)   | 磷脂酰胆碱_PC(14:0_20:5)   | GP      | 甘油磷脂类  | PC       | 磷脂酰胆碱  | C42H74NO8P | 300810   | 329420   | 584810   | 400600   | 437660   | 509220   | 706690   | 583030   | 826600   | 574660   | 569940   | 663190   | 836210   | 666130   | 626510   |
| LIPID-P-0514 | PC(15:0_20:5)   | 磷脂酰胆碱_PC(15:0_20:5)   | GP      | 甘油磷脂类  | PC       | 磷脂酰胆碱  | C43H76NO8P | 225770   | 158000   | 270850   | 165330   | 265360   | 200750   | 243730   | 300120   | 242580   | 280360   | 237790   | 273330   | 311860   | 211490   | 230610   |
| LIPID-P-0515 | PC(16:0_20:5)   | 磷脂酰胆碱_PC(16:0_20:5)   | GP      | 甘油磷脂类  | PC       | 磷脂酰胆碱  | C44H78NO8P | 2905000  | 3059400  | 2902700  | 2744700  | 3346000  | 2751800  | 2406000  | 2681000  | 2459800  | 2765600  | 2342100  | 2245400  | 2416000  | 2288000  | 2106200  |
| LIPID-P-0516 | PC(17:1_20:4)   | 磷脂酰胆碱_PC(17:1_20:4)   | GP      | 甘油磷脂类  | PC       | 磷脂酰胆碱  | C45H80NO8P | 2166500  | 1954500  | 1612900  | 234000   | 240000   | 2543300  | 2706300  | 2601900  | 2575600  | 2501400  | 1991000  | 1950500  | 1761100  | 2098200  | 1652300  |
| LIPID-P-0517 | PC(16:0_22:5)   | 磷脂酰胆碱_PC(16:0_22:5)   | GP      | 甘油磷脂类  | PC       | 磷脂酰胆碱  | C46H82NO8P | 949480   | 1153300  | 649550   | 1271600  | 1068700  | 1012600  | 959990   | 965380   | 991750   | 875800   | 602960   | 670540   | 744510   | 736400   | 602950   |
| LIPID-P-0518 | PC(18:0_22:5)   | 磷脂酰胆碱_PC(18:0_22:5)   | GP      | 甘油磷脂类  | PC       | 磷脂酰胆碱  | C48H86NO8P | 584200   | 4794400  | 3781400  | 6441400  | 4493300  | 6068500  | 5156600  | 5738400  | 4633700  | 5278700  | 4990300  | 5013100  | 3754800  | 4524800  | 5150100  |
| LIPID-P-0519 | PC(24:1_20:4)   | 磷脂酰胆碱_PC(24:1_20:4)   | GP      | 甘油磷脂类  | PC       | 磷脂酰胆碱  | C52H94NO8P | 157040   | 128140   | 392070   | 156580   | 158740   | 119730   | 123670   | 126840   | 106030   | 137510   | 269200   | 115110   | 127130   | 295200   | 114230   |
| LIPID-P-0520 | PC(14:0_22:6)   | 磷脂酰胆碱_PC(14:0_22:6)   | GP      | 甘油磷脂类  | PC       | 磷脂酰胆碱  | C44H76NO8P | 8591700  | 9906200  | 1006800  | 9457800  | 1172100  | 1070400  | 1194400  | 1112100  | 1206200  | 1227600  | 1107100  | 1185000  | 1345200  | 1146400  | 1303000  |
| LIPID-P-0521 | PC(15:1_22:5)   | 磷脂酰胆碱_PC(15:1_22:5)   | GP      | 甘油磷脂类  | PC       | 磷脂酰胆碱  | C45H78NO8P | 4817500  | 6130900  | 7454200  | 473600   | 7741500  | 752500   | 1086300  | 1056600  | 1193800  | 1065900  | 1282900  | 1229800  | 1422000  | 1239900  | 1219800  |
| LIPID-P-0522 | PC(16:0_22:6)   | 磷脂酰胆碱_PC(16:0_22:6)   | GP      | 甘油磷脂类  | PC       | 磷脂酰胆碱  | C46H80NO8P | 1495500  | 2052000  | 1713300  | 1731500  | 2053600  | 1819200  | 2196700  | 1999500  | 2258600  | 2155400  | 2462800  | 2389000  | 2289100  | 2564400  | 2445300  |
| LIPID-P-0523 | PC(22:6_17:0)   | 磷脂酰胆碱_PC(22:6_17:0)   | GP      | 甘油磷脂类  | PC       | 磷脂酰胆碱  | C47H82NO8P | 1230200  | 1827600  | 1875100  | 1526200  | 2017500  | 2320100  | 341100   | 2636000  | 3552500  | 2862300  | 3557200  | 3604100  | 3335500  | 3347100  | 3674200  |
| LIPID-P-0524 | PC(18:0_22:6)   | 磷脂酰胆碱_PC(18:0_22:6)   | GP      | 甘油磷脂类  | PC       | 磷脂酰胆碱  | C48H84NO8P | 37615000 | 51809000 | 30321000 | 54918000 | 50666000 | 53598000 | 55142000 | 50808000 | 51489000 | 50430000 | 52123000 | 51238000 | 44938000 | 53402000 | 49284000 |
| LIPID-P-0525 | PC(20:0_22:6)   | 磷脂酰胆碱_PC(20:0_22:6)   | GP      | 甘油磷脂类  | PC       | 磷脂酰胆碱  | C50H88NO8P | 2436600  | 127000   | 866530   | 2296700  | 169390   | 1872500  | 1728400  | 1782800  | 1442400  | 1918700  | 1955200  | 2555700  | 1771600  | 2058800  | 2626800  |
| LIPID-P-0526 | PC(16:1_22:6)   | 磷脂酰胆碱_PC(16:1_22:6)   | GP      | 甘油磷脂类  | PC       | 磷脂酰胆碱  | C46H78NO8P | 9625900  | 9858500  | 9268800  | 1025400  | 1194000  | 9506360  | 9754800  | 9610000  | 9230900  | 9288100  | 8801900  | 7769200  | 9373800  | 8390900  | 8188800  |
| LIPID-P-0527 | PC(18:1_22:6)   | 磷脂酰胆碱_PC(18:1_22:6)   | GP      | 甘油磷脂类  | PC       | 磷脂酰胆碱  | C48H82NO8P | 42548000 | 42958000 | 30922000 | 49589000 | 47402000 | 44093000 | 46598000 | 44884000 | 45370000 | 44166000 | 39524000 | 41026000 | 39596000 | 40569000 | 38165000 |
| LIPID-P-0528 | PC(20:1_22:6)   | 磷脂酰胆碱_PC(20:1_22:6)   | GP      | 甘油磷脂类  | PC       | 磷脂酰胆碱  | C50H86NO8P | 1925900  | 1898900  | 1017200  | 3011700  | 1964900  | 2332700  | 2068500  | 2285100  | 2023600  | 2113800  | 1392500  | 1575500  | 1170800  | 1524100  | 1432600  |
| LIPID-P-0529 | PC(20:4_20:4)   | 磷脂酰胆碱_PC(20:4_20:4)   | GP      | 甘油磷脂类  | PC       | 磷脂酰胆碱  | C48H80NO8P | 1919000  | 2137100  | 1241700  | 1900900  | 2128000  | 1692300  | 2029900  | 1755000  | 2051000  | 1620300  | 2326000  | 2253000  | 2314000  | 2221400  | 2221600  |
| LIPID-P-0530 | PC(20:2_22:6)   | 磷脂酰胆碱_PC(20:2_22:6)   | GP      | 甘油磷脂类  | PC       | 磷脂酰胆碱  | C50H84NO8P | 6322800  | 491380   | 554890   | 704990   | 621700   | 708110   | 608400   | 731900   | 697940   | 686340   | 640870   | 729690   | 549440   | 693100   | 674700   |
| LIPID-P-0531 | PC(0-16:0_14:0) | 磷脂酰胆碱_PC(0-16:0_14:0) | GP      | 甘油磷脂类  | PC-O     | 磷脂酰胆碱  | C38H78NO7P | 417460   | 456340   | 1645900  | 431630   | 496050   | 424800   | 319430   | 308150   | 274070   | 38500    | 26283    |          |          |          |          |

| Index        | Compounds       | 物质                     | Class I | 物质一级分类 | Class II | 物质二级分类 | Formula    | ND1      | ND2     | ND3      | ND4      | ND5      | HF1      | HF2      | HF3      | HF4      | HF5      | AST-H1    | AST-H2    | AST-H3    | AST-H4    | AST-H5    |
|--------------|-----------------|------------------------|---------|--------|----------|--------|------------|----------|---------|----------|----------|----------|----------|----------|----------|----------|----------|-----------|-----------|-----------|-----------|-----------|
| LIPID-P-0569 | PC(O-18:1_22:6) | 磷脂酰胆碱_PC(O-18:1_22:6)  | GP      | 甘油磷脂类  | PC-O     | 磷脂酰胆碱  | C48H84NO7P | 2421500  | 3312700 | 10053000 | 3416000  | 3326800  | 3482900  | 3736200  | 2956500  | 4472300  | 3189300  | 4685700   | 3647000   | 5310800   | 4283100   | 3230700   |
| LIPID-P-0574 | PE(20:0_18:0)   | 磷脂酰乙醇胺_PE(20:0_18:0)   | GP      | 甘油磷脂类  | PE       | 磷脂酰乙醇胺 | C43H86NO8P | 1003700  | 1005040 | 2007300  | 2977200  | 85504    | 1427700  | 135060   | 138640   | 184310   | 145300   | 109680    | 163700    | 135570    | 115160    | 120240    |
| LIPID-P-0575 | PE(16:1_14:0)   | 磷脂酰乙醇胺_PE(16:1_14:0)   | GP      | 甘油磷脂类  | PE       | 磷脂酰乙醇胺 | C35H68NO8P | 45987    | 50705   | 101160   | 32589    | 56645    | 27405    | 20711    | 33312    | 28918    | 29534    | 19239     | 14068     | 17089     | 27727     | 18632     |
| LIPID-P-0576 | PE(17:0_14:1)   | 磷脂酰乙醇胺_PE(17:0_14:1)   | GP      | 甘油磷脂类  | PE       | 磷脂酰乙醇胺 | C36H70NO8P | 10887    | 15424   | 43893    | 14962    | 21736    | 25566    | 22517    | 19453    | 24452    | 21998    | 10744     | 23407     | 23384     | 14662     |           |
| LIPID-P-0577 | PE(16:1_16:0)   | 磷脂酰乙醇胺_PE(16:1_16:0)   | GP      | 甘油磷脂类  | PE       | 磷脂酰乙醇胺 | C37H72NO8P | 623100   | 7361600 | 9331500  | 6867300  | 5820200  | 3528200  | 3091900  | 4305500  | 3377000  | 3606300  | 2623900   | 2578500   | 2602300   | 2577800   | 2280100   |
| LIPID-P-0578 | PE(15:0_18:1)   | 磷脂酰乙醇胺_PE(15:0_18:1)   | GP      | 甘油磷脂类  | PE       | 磷脂酰乙醇胺 | C38H74NO8P | 821740   | 867000  | 1365900  | 643010   | 921620   | 714210   | 774440   | 871930   | 741920   | 619060   | 671910    | 714800    | 700540    | 702180    |           |
| LIPID-P-0580 | PE(17:0_18:1)   | 磷脂酰乙醇胺_PE(17:0_18:1)   | GP      | 甘油磷脂类  | PE       | 磷脂酰乙醇胺 | C40H78NO8P | 722210   | 886970  | 2828100  | 1087400  | 787290   | 1225700  | 1046400  | 1161600  | 1382100  | 979100   | 960480    | 1259400   | 1187600   | 956110    | 958630    |
| LIPID-P-0583 | PE(24:0_16:1)   | 磷脂酰乙醇胺_PE(24:0_16:1)   | GP      | 甘油磷脂类  | PE       | 磷脂酰乙醇胺 | C45H88NO8P | 108180   | 91487   | 583910   | 132650   | 100920   | 94602    | 112660   | 121920   | 94534    | 130650   | 141810    | 128480    | 111050    | 136710    |           |
| LIPID-P-0585 | PE(18:2_14:0)   | 磷脂酰乙醇胺_PE(18:2_14:0)   | GP      | 甘油磷脂类  | PE       | 磷脂酰乙醇胺 | C37H70NO8P | 1090700  | 811230  | 1436500  | 781440   | 920130   | 588490   | 436240   | 633450   | 562850   | 493630   | 451850    | 461220    | 516010    | 470300    | 501190    |
| LIPID-P-0586 | PE(16:1_17:1)   | 磷脂酰乙醇胺_PE(16:1_17:1)   | GP      | 甘油磷脂类  | PE       | 磷脂酰乙醇胺 | C38H72NO8P | 234260   | 197120  | 419740   | 136750   | 220580   | 240860   | 226080   | 309380   | 314490   | 289150   | 396960    | 385250    | 476740    | 374570    | 400920    |
| LIPID-P-0587 | PE(18:1_16:1)   | 磷脂酰乙醇胺_PE(18:1_16:1)   | GP      | 甘油磷脂类  | PE       | 磷脂酰乙醇胺 | C39H74NO8P | 79673000 | 6536000 | 86810000 | 71465000 | 67718000 | 67498000 | 83494000 | 96496000 | 78541000 | 83530000 | 120330000 | 147060000 | 150000000 | 135000000 | 140220000 |
| LIPID-P-0588 | PE(17:1_18:1)   | 磷脂酰乙醇胺_PE(17:1_18:1)   | GP      | 甘油磷脂类  | PE       | 磷脂酰乙醇胺 | C40H76NO8P | 871520   | 832050  | 1238700  | 414120   | 816960   | 1200600  | 1431800  | 1554100  | 1700700  | 1389000  | 3162300   | 3454100   | 4080700   | 2664200   | 4120800   |
| LIPID-P-0590 | PE(19:0_18:2)   | 磷脂酰乙醇胺_PE(19:0_18:2)   | GP      | 甘油磷脂类  | PE       | 磷脂酰乙醇胺 | C42H80NO8P | 780540   | 595840  | 1837200  | 572360   | 546260   | 857610   | 908440   | 1202600  | 916040   | 946050   | 1255100   | 1503400   | 1249300   | 1331800   | 1432300   |
| LIPID-P-0592 | PE(22:2_18:0)   | 磷脂酰乙醇胺_PE(22:2_18:0)   | GP      | 甘油磷脂类  | PE       | 磷脂酰乙醇胺 | C45H86NO8P | 426560   | 491410  | 550480   | 645200   | 370030   | 394080   | 379120   | 353800   | 401370   | 449390   | 283780    | 391360    | 305500    | 287180    | 310640    |
| LIPID-P-0593 | PE(18:1_24:1)   | 磷脂酰乙醇胺_PE(18:1_24:1)   | GP      | 甘油磷脂类  | PE       | 磷脂酰乙醇胺 | C47H90NO8P | 49493    | 58321   | 219350   | 60175    | 45747    | 27726    | 40829    | 49858    | 41473    | 64643    | 70767     | 48315     | 57061     | 62696     | 49021     |
| LIPID-P-0598 | PE(18:2_19:1)   | 磷脂酰乙醇胺_PE(18:2_19:1)   | GP      | 甘油磷脂类  | PE       | 磷脂酰乙醇胺 | C42H78NO8P | 1312600  | 1722200 | 1551500  | 903850   | 1601800  | 1542600  | 2112800  | 2301500  | 2959900  | 2326000  | 3229700   | 2893700   | 3395300   | 3871000   | 2702400   |
| LIPID-P-0600 | PE(17:0_22:3)   | 磷脂酰乙醇胺_PE(17:0_22:3)   | GP      | 甘油磷脂类  | PE       | 磷脂酰乙醇胺 | C44H82NO8P | 121880   | 133080  | 235660   | 96666    | 173300   | 99248    | 88120    | 88211    | 85790    | 129130   | 135590    | 204980    | 143040    | 121190    | 164620    |
| LIPID-P-0601 | PE(18:2_22:1)   | 磷脂酰乙醇胺_PE(18:2_22:1)   | GP      | 甘油磷脂类  | PE       | 磷脂酰乙醇胺 | C45H84NO8P | 1142600  | 1477700 | 4463600  | 1747000  | 1144800  | 931520   | 681980   | 831230   | 934070   | 895100   | 680590    | 631540    | 639240    | 562750    | 713520    |
| LIPID-P-0603 | PE(20:4_14:0)   | 磷脂酰乙醇胺_PE(20:4_14:0)   | GP      | 甘油磷脂类  | PE       | 磷脂酰乙醇胺 | C39H70NO8P | 471660   | 418440  | 658140   | 500850   | 515010   | 466130   | 354900   | 467830   | 345980   | 503750   | 453490    | 458950    | 327180    | 376290    | 454470    |
| LIPID-P-0607 | PE(19:0_20:4)   | 磷脂酰乙醇胺_PE(19:0_20:4)   | GP      | 甘油磷脂类  | PE       | 磷脂酰乙醇胺 | C44H80NO8P | 610160   | 3395900 | 5397500  | 3849300  | 4560800  | 3850400  | 3816600  | 5425900  | 5629900  | 5951900  | 8241100   | 9889500   | 8635500   | 9077000   | 9467200   |
| LIPID-P-0609 | PE(20:4_22:0)   | 磷脂酰乙醇胺_PE(20:4_22:0)   | GP      | 甘油磷脂类  | PE       | 磷脂酰乙醇胺 | C44H78NO8P | 246860   | 251210  | 772300   | 310710   | 201590   | 340620   | 310500   | 307020   | 434070   | 388330   | 715860    | 390130    | 386690    | 704630    | 386700    |
| LIPID-P-0610 | PE(16:1_20:4)   | 磷脂酰乙醇胺_PE(16:1_20:4)   | GP      | 甘油磷脂类  | PE       | 磷脂酰乙醇胺 | C41H72NO8P | 4773100  | 4413300 | 5228900  | 3087800  | 4721000  | 3352500  | 2923000  | 4118000  | 3376300  | 3774100  | 3375400   | 2277800   | 2613100   | 3404100   | 2582600   |
| LIPID-P-0611 | PE(17:0_20:5)   | 磷脂酰乙醇胺_PE(17:0_20:5)   | GP      | 甘油磷脂类  | PE       | 磷脂酰乙醇胺 | C42H74NO8P | 3651700  | 2650900 | 2212400  | 2187900  | 2673300  | 3692200  | 3377200  | 3800500  | 3025600  | 3938200  | 3131600   | 3314900   | 3020900   | 3454900   | 3109200   |
| LIPID-P-0613 | PE(17:0_22:5)   | 磷脂酰乙醇胺_PE(17:0_22:5)   | GP      | 甘油磷脂类  | PE       | 磷脂酰乙醇胺 | C44H78NO8P | 3315300  | 3648200 | 3385400  | 3353100  | 3763000  | 4057000  | 4624900  | 4441000  | 3920400  | 4074100  | 4607200   | 4064700   | 3487500   | 4475500   | 3526000   |
| LIPID-P-0614 | PE(18:0_22:5)   | 磷脂酰乙醇胺_PE(18:0_22:5)   | GP      | 甘油磷脂类  | PE       | 磷脂酰乙醇胺 | C45H80NO8P | 2895700  | 3746600 | 3775800  | 4146400  | 3421200  | 3966200  | 3762300  | 4295300  | 4560400  | 5060800  | 5881100   | 6617500   | 6209900   | 7212300   | 6460000   |
| LIPID-P-0615 | PE(18:0_24:5)   | 磷脂酰乙醇胺_PE(18:0_24:5)   | GP      | 甘油磷脂类  | PE       | 磷脂酰乙醇胺 | C47H84NO8P | 818430   | 512770  | 1016600  | 596290   | 568850   | 474300   | 497240   | 538670   | 483900   | 547390   | 632360    | 464850    | 641280    | 777800    | 576850    |
| LIPID-P-0616 | PE(24:1_20:4)   | 磷脂酰乙醇胺_PE(24:1_20:4)   | GP      | 甘油磷脂类  | PE       | 磷脂酰乙醇胺 | C49H88NO8P | 59852    | 42447   | 156550   | 44496    | 41049    | 34227    | 37452    | 43795    | 37816    | 44725    | 103940    | 49610     | 37043     | 93527     | 42339     |
| LIPID-P-0617 | PE(14:0_22:6)   | 磷脂酰乙醇胺_PE(14:0_22:6)   | GP      | 甘油磷脂类  | PE       | 磷脂酰乙醇胺 | C41H70NO8P | 848960   | 1123500 | 1382700  | 1122400  | 905640   | 1180600  | 973170   | 1171600  | 957570   | 927520   | 834000    | 1079100   | 1091900   | 1160200   | 911840    |
| LIPID-P-0618 | PE(15:0_22:6)   | 磷脂酰乙醇胺_PE(15:0_22:6)   | GP      | 甘油磷脂类  | PE       | 磷脂酰乙醇胺 | C42H72NO8P | 2566200  | 3379400 | 4388500  | 2567500  | 3306400  | 4130400  | 4636800  | 5358900  | 6104000  | 4833400  | 6957800   | 6691100   | 7028500   | 6414800   | 6067000   |
| LIPID-P-0619 | PE(20:5_18:1)   | 磷脂酰乙醇胺_PE(20:5_18:1)   | GP      | 甘油磷脂类  | PE       | 磷脂酰乙醇胺 | C43H74NO8P | 4632300  | 6147000 | 5327000  | 5185300  | 5951900  | 6194700  | 6030500  | 6592000  | 6550600  | 6069000  | 7749000   | 7715800   | 6862900   | 7636300   | 7348200   |
| LIPID-P-0620 | PE(17:0_22:6)   | 磷脂酰乙醇胺_PE(17:0_22:6)   | GP      | 甘油磷脂类  | PE       | 磷脂酰乙醇胺 | C41H76NO8P | 3015100  | 5578400 | 7392300  | 6058900  | 5319300  | 5355300  | 8893300  | 10358000 | 9035100  | 10642000 | 17428000  | 20073000  | 17131000  | 18746000  | 18497000  |
| LIPID-P-0622 | PE(19:0_22:6)   | 磷脂酰乙醇胺_PE(19:0_22:6)   | GP      | 甘油磷脂类  | PE       | 磷脂酰乙醇胺 | C46H80NO8P | 927100   | 1015500 | 2926600  | 870760   | 1117300  | 1100100  | 1477100  | 1833700  | 1842500  | 1965800  | 3323900   | 4528800   | 3482600   | 2904000   | 4153300   |
| LIPID-P-0623 | PE(22:6_20:0)   | 磷脂酰乙醇胺_PE(22:6_20:0)   | GP      | 甘油磷脂类  | PE       | 磷脂酰乙醇胺 | C47H82NO8P | 1488800  | 721160  | 968920   | 1247700  | 811150   | 989030   | 706820   | 1304800  | 849950   | 1208000  | 1280700   | 2082000   | 1429800   | 1529500   | 1894200   |
| LIPID-P-0624 | PE(16:1_22:6)   | 磷脂酰乙醇胺_PE(16:1_22:6)   | GP      | 甘油磷脂类  | PE       | 磷脂酰乙醇胺 | C43H72NO8P | 4870000  | 5697300 | 6301500  | 5100100  | 6591100  | 4871900  | 4044600  | 4734700  | 4317200  | 4985500  | 4456600   | 4183300   | 4173400   | 5077800   | 4278200   |
| LIPID-P-0625 | PE(17:1_22:6)   | 磷脂酰乙醇胺_PE(17:1_22:6)   | GP      | 甘油磷脂类  | PE       | 磷脂酰乙醇胺 | C44H74NO8P | 4880800  | 5028000 | 4047000  | 4458200  | 5521900  | 5877000  | 5812900  | 7208200  | 6873700  | 6408400  | 6426800   | 6983300   | 7178900   | 5893100   |           |
| LIPID-P-0627 | PE(19:2_22:5)   | 磷脂酰乙醇胺_PE(19:2_22:5)   | GP      | 甘油磷脂类  | PE       | 磷脂酰乙醇胺 | C46H78NO8P | 1575600  | 1921900 | 2185900  | 2194300  | 1712800  | 2385500  | 2302700  | 2683500  | 2517100  | 2755100  | 2222600   | 2456100   | 1814000   | 2455100   | 2186500   |
| LIPID-P-0629 | PE(22:6_18:2)   | 磷脂酰乙醇胺_PE(22:6_18:2)   | GP      | 甘油磷脂类  | PE       | 磷脂酰乙醇胺 | C45H74NO8P | 4743000  | 5522900 | 3478600  | 4034000  | 5175100  | 4490500  | 4809900  | 4679800  | 4843100  | 4795100  | 7953000   | 8698100   | 7013400   | 8136500   | 8057200   |
| LIPID-P-0630 | PE(P-18:0_16:0) | 磷脂酰乙醇胺_PE(P-18:0_16:0) | GP      | 甘油磷脂类  | PE-P     | 磷脂酰乙醇胺 | C39H70NO7P | 465420   | 531390  | 1940200  | 620860   | 485990   | 409770   | 366040   | 424610   | 389800   | 445380   | 701410    | 386720    | 384210    | 705280    | 363590    |
| LIPID-P-0631 | PE(P-18:0_18:0) | 磷脂酰乙醇胺_PE(P-18:0_18:0) | GP      | 甘油磷脂类  | PE-P     | 磷脂酰乙醇胺 | C41H82NO7P | 217150   | 337130  | 1037800  | 342800   | 262950   | 262270   | 276040   | 324990   | 373090   | 385170   | 211220    | 260150    | 471120    | 204410    | 263090    |
| LIPID-P-0632 | PE(P-18:0_20:0) | 磷脂酰乙醇胺_PE(P-18:0_20:0) | GP      | 甘油磷脂类  | PE-P     | 磷脂酰乙醇胺 | C43H86NO7P | 87867    | 244230  | 662370   | 285660   | 175240   | 191080   | 200490   | 275320   | 321220   | 279200   | 181490    | 273210    | 685270    | 214390    | 254520    |
| LIPID-P-0633 | PE(P-20:0_20:0) | 磷脂酰乙醇胺_PE(P-20:0_20:0) | GP      | 甘油磷脂类  | PE-P     | 磷脂酰乙醇胺 | C45H90NO7P | 23073    | 69257   | 150800   | 75443    | 40851    | 72986    | 69477    | 79997    | 110700   | 86051    | 76698     | 107210    | 221070    | 54204     | 94695     |
| LIPID-P-0636 | PE(P-16:0_18:1) | 磷脂酰乙醇胺_PE(P-16:0_18:1) | GP      | 甘油磷脂类  | PE-P     | 磷脂酰乙醇胺 | C39H76NO7P | 52196    | 76205   | 296080   | 86162    | 79430    | 61098    |          |          |          |          |           |           |           |           |           |



| Index        | Compounds      | 物质                  | Class I | 物质一級分类 | Class II | 物质二級分类 | Formula      | ND1     | ND2     | ND3     | ND4     | ND5     | HF1     | HF2      | HF3     | HF4      | HF5     | AST-H1   | AST-H2   | AST-H3   | AST-H4   | AST-H5   |
|--------------|----------------|---------------------|---------|--------|----------|--------|--------------|---------|---------|---------|---------|---------|---------|----------|---------|----------|---------|----------|----------|----------|----------|----------|
| LIPID-P-0724 | PS(17:0_22:6)  | 鞘脂酰基酸 PS(17:0_22:6) | GP      | 鞘脂酰基酸  | PS       | 鞘脂酰基酸  | C45H76NO10IP | 44199   | 69080   | 172580  | 80198   | 63825   | 146140  | 132540   | 222680  | 227590   | 114170  | 207080   | 196130   | 219290   | 257400   | 256200   |
| LIPID-P-0725 | PS(18:0_22:6)  | 鞘脂酰基酸 PS(18:0_22:6) | GP      | 鞘脂酰基酸  | PS       | 鞘脂酰基酸  | C46H78NO10IP | 2095900 | 4278200 | 9222400 | 4892700 | 3467300 | 4370200 | 3703400  | 8560400 | 10393000 | 4558700 | 8239700  | 7446900  | 5825100  | 9249500  | 8510900  |
| LIPID-P-0726 | PS(18:1_22:6)  | 鞘脂酰基酸 PS(18:1_22:6) | GP      | 鞘脂酰基酸  | PS       | 鞘脂酰基酸  | C46H76NO10IP | 376600  | 849530  | 1564800 | 1014900 | 750760  | 817980  | 343310   | 921690  | 929360   | 526190  | 1020200  | 667770   | 600140   | 1072300  | 771820   |
| LIPID-P-0729 | SM(d18:0/14:0) | 鞘脂类 SM(d18:0/14:0)  | SL      | 鞘脂类    | SM       | 鞘脂类    | C37H77N2O6P  | 100080  | 175470  | 185450  | 190290  | 175050  | 119810  | 116360   | 106090  | 145740   | 121650  | 130780   | 111540   | 112060   | 138710   | 98561    |
| LIPID-P-0730 | SM(d18:0/16:0) | 鞘脂类 SM(d18:0/16:0)  | SL      | 鞘脂类    | SM       | 鞘脂类    | C39H81N2O6P  | 173030  | 222990  | 259570  | 222150  | 205600  | 225480  | 194800   | 196370  | 222980   | 212630  | 236520   | 136650   | 206670   | 229670   | 178280   |
| LIPID-P-0731 | SM(d18:0/17:0) | 鞘脂类 SM(d18:0/17:0)  | SL      | 鞘脂类    | SM       | 鞘脂类    | C40H83N2O6P  | 576870  | 686820  | 2529600 | 632540  | 651600  | 519110  | 508100   | 506580  | 593280   | 470950  | 636960   | 327420   | 462010   | 530530   | 428640   |
| LIPID-P-0732 | SM(d18:0/18:0) | 鞘脂类 SM(d18:0/18:0)  | SL      | 鞘脂类    | SM       | 鞘脂类    | C41H85N2O6P  | 741210  | 1757800 | 1257200 | 1873000 | 1221300 | 1829100 | 1825600  | 1946100 | 2044900  | 1694600 | 1640200  | 1912200  | 1744600  | 1621400  | 2023400  |
| LIPID-P-0734 | SM(d18:0/22:0) | 鞘脂类 SM(d18:0/22:0)  | SL      | 鞘脂类    | SM       | 鞘脂类    | C45H93N2O6P  | 492630  | 851550  | 332420  | 1060300 | 690770  | 888200  | 677060   | 820890  | 834120   | 795050  | 792560   | 819000   | 665350   | 868930   | 812040   |
| LIPID-P-0735 | SM(d18:1/12:0) | 鞘脂类 SM(d18:1/12:0)  | SL      | 鞘脂类    | SM       | 鞘脂类    | C35H71N2O6P  | 28695   | 47389   | 74379   | 54092   | 51067   | 28027   | 30198    | 33250   | 33442    | 26952   | 34151    | 29164    | 28825    | 35700    | 28060    |
| LIPID-P-0736 | SM(d18:1/14:0) | 鞘脂类 SM(d18:1/14:0)  | SL      | 鞘脂类    | SM       | 鞘脂类    | C37H75N2O6P  | 23547   | 43736   | 49317   | 45658   | 40975   | 31437   | 26507    | 38245   | 36709    | 30291   | 38315    | 26996    | 28863    | 38898    | 25720    |
| LIPID-P-0737 | SM(d18:1/15:0) | 鞘脂类 SM(d18:1/15:0)  | SL      | 鞘脂类    | SM       | 鞘脂类    | C38H77N2O6P  | 704710  | 1073400 | 1321000 | 894440  | 1006400 | 8661200 | 10117000 | 9456700 | 11972000 | 9627100 | 14924000 | 11672000 | 10502000 | 13984000 | 11302000 |
| LIPID-P-0738 | SM(d18:1/16:0) | 鞘脂类 SM(d18:1/16:0)  | SL      | 鞘脂类    | SM       | 鞘脂类    | C39H79N2O6P  | 2548300 | 3933600 | 6418300 | 3705100 | 3660400 | 3920600 | 4372600  | 3909900 | 4670900  | 3806200 | 6297800  | 3934500  | 4135200  | 5548400  | 3966600  |
| LIPID-P-0739 | SM(d18:1/17:0) | 鞘脂类 SM(d18:1/17:0)  | SL      | 鞘脂类    | SM       | 鞘脂类    | C40H81N2O6P  | 2601800 | 3868700 | 8696200 | 3622800 | 3658400 | 4392300 | 5865100  | 4540700 | 6410500  | 5005600 | 6567100  | 5706300  | 6339300  | 6940200  | 5500200  |
| LIPID-P-0740 | SM(d18:1/18:0) | 鞘脂类 SM(d18:1/18:0)  | SL      | 鞘脂类    | SM       | 鞘脂类    | C41H83N2O6P  | 265320  | 555420  | 1003400 | 568870  | 471510  | 538890  | 615100   | 538860  | 711860   | 614270  | 672960   | 627170   | 622380   | 592130   | 656890   |
| LIPID-P-0741 | SM(d18:1/19:0) | 鞘脂类 SM(d18:1/19:0)  | SL      | 鞘脂类    | SM       | 鞘脂类    | C42H85N2O6P  | 1817800 | 2224600 | 3897600 | 2251100 | 2364700 | 2522100 | 2763100  | 2750600 | 2910900  | 2770200 | 3214500  | 3099100  | 3193000  | 3005700  | 3120200  |
| LIPID-P-0742 | SM(d18:1/20:0) | 鞘脂类 SM(d18:1/20:0)  | SL      | 鞘脂类    | SM       | 鞘脂类    | C43H87N2O6P  | 304060  | 486560  | 586130  | 549470  | 421870  | 577840  | 486850   | 543590  | 562350   | 542310  | 621750   | 491600   | 522310   | 522120   | 504910   |
| LIPID-P-0743 | SM(d18:1/21:0) | 鞘脂类 SM(d18:1/21:0)  | SL      | 鞘脂类    | SM       | 鞘脂类    | C44H89N2O6P  | 569500  | 4907300 | 5389900 | 4918400 | 4830900 | 4368800 | 4739800  | 6441200 | 5516300  | 5428800 | 6572700  | 7460400  | 6942200  | 6244100  | 7207700  |
| LIPID-P-0744 | SM(d18:1/22:0) | 鞘脂类 SM(d18:1/22:0)  | SL      | 鞘脂类    | SM       | 鞘脂类    | C45H91N2O6P  | 774660  | 924680  | 801660  | 989700  | 791810  | 903580  | 845120   | 1250800 | 1026700  | 955330  | 1463800  | 1279400  | 1294700  | 1136400  | 1182200  |
| LIPID-P-0745 | SM(d18:1/23:0) | 鞘脂类 SM(d18:1/23:0)  | SL      | 鞘脂类    | SM       | 鞘脂类    | C46H93N2O6P  | 1292900 | 2051000 | 3817800 | 2186200 | 1927800 | 1753800 | 2298600  | 2300500 | 2707200  | 2022700 | 3041700  | 3102700  | 3079200  | 2758800  | 2850500  |
| LIPID-P-0746 | SM(d18:1/24:0) | 鞘脂类 SM(d18:1/24:0)  | SL      | 鞘脂类    | SM       | 鞘脂类    | C47H95N2O6P  | 400710  | 487020  | 738250  | 654600  | 452590  | 428400  | 45610    | 485050  | 563260   | 492060  | 955870   | 956180   | 903460   | 831810   | 851690   |
| LIPID-P-0747 | SM(d18:1/25:0) | 鞘脂类 SM(d18:1/25:0)  | SL      | 鞘脂类    | SM       | 鞘脂类    | C48H97N2O6P  | 1725100 | 2206200 | 2868300 | 2414100 | 2429900 | 1926200 | 2955600  | 2667700 | 3588800  | 2534500 | 2751400  | 3892700  | 3155700  | 2670600  | 3026900  |
| LIPID-P-0748 | SM(d20:0/24:1) | 鞘脂类 SM(d20:0/24:1)  | SL      | 鞘脂类    | SM       | 鞘脂类    | C49H99N2O6P  | 158470  | 206400  | 287450  | 217030  | 228140  | 209570  | 217380   | 239600  | 286070   | 2287010 | 343750   | 386070   | 382780   | 391850   | 406200   |
| LIPID-P-0749 | SM(d18:2/14:0) | 鞘脂类 SM(d18:2/14:0)  | SL      | 鞘脂类    | SM       | 鞘脂类    | C37H73N2O6P  | 54261   | 88453   | 95564   | 71895   | 88778   | 58077   | 58715    | 67391   | 61764    | 61415   | 57033    | 48046    | 46016    | 53333    | 49702    |
| LIPID-P-0750 | SM(d18:1/16:1) | 鞘脂类 SM(d18:1/16:1)  | SL      | 鞘脂类    | SM       | 鞘脂类    | C39H77N2O6P  | 72427   | 80492   | 161680  | 75275   | 91409   | 93134   | 89411    | 88023   | 95063    | 75073   | 109800   | 90753    | 108280   | 114400   | 90690    |
| LIPID-P-0751 | SM(d18:1/17:1) | 鞘脂类 SM(d18:1/17:1)  | SL      | 鞘脂类    | SM       | 鞘脂类    | C40H79N2O6P  | 72047   | 91670   | 163480  | 81425   | 104110  | 104600  | 152100   | 153350  | 159380   | 140350  | 214800   | 184010   | 144540   | 210500   | 120540   |
| LIPID-P-0752 | SM(d18:1/18:1) | 鞘脂类 SM(d18:1/18:1)  | SL      | 鞘脂类    | SM       | 鞘脂类    | C41H81N2O6P  | 29165   | 36263   | 102750  | 52524   | 45717   | 49474   | 42212    | 52719   | 48500    | 38041   | 69507    | 47813    | 62627    | 49727    | 44089    |
| LIPID-P-0753 | SM(d18:1/19:1) | 鞘脂类 SM(d18:1/19:1)  | SL      | 鞘脂类    | SM       | 鞘脂类    | C42H83N2O6P  | 24871   | 51462   | 158260  | 41353   | 45735   | 54391   | 40570    | 55020   | 64288    | 37179   | 68238    | 43700    | 65449    | 77542    | 65994    |
| LIPID-P-0754 | SM(d18:1/20:1) | 鞘脂类 SM(d18:1/20:1)  | SL      | 鞘脂类    | SM       | 鞘脂类    | C43H85N2O6P  | 203600  | 2303200 | 4569700 | 2360700 | 2162400 | 3019200 | 3290700  | 2936400 | 3026500  | 2542000 | 2957500  | 2394100  | 2945900  | 2762300  | 2645800  |
| LIPID-P-0755 | SM(d18:1/21:1) | 鞘脂类 SM(d18:1/21:1)  | SL      | 鞘脂类    | SM       | 鞘脂类    | C44H87N2O6P  | 227200  | 1467800 | 905280  | 1443500 | 1560200 | 1838800 | 1287300  | 1714500 | 1368700  | 1669800 | 1045400  | 1200700  | 860940   | 1104300  | 1142800  |
| LIPID-P-0756 | SM(d18:1/22:1) | 鞘脂类 SM(d18:1/22:1)  | SL      | 鞘脂类    | SM       | 鞘脂类    | C45H89N2O6P  | 3836500 | 3217600 | 1470000 | 4222300 | 3716700 | 4498700 | 3383000  | 3406000 | 3318300  | 3901400 | 2645600  | 2435000  | 2092700  | 2649700  | 2371000  |
| LIPID-P-0757 | SM(d18:1/23:1) | 鞘脂类 SM(d18:1/23:1)  | SL      | 鞘脂类    | SM       | 鞘脂类    | C46H91N2O6P  | 1640900 | 1609200 | 3632700 | 1808400 | 1886300 | 1690300 | 1792300  | 1834500 | 2192100  | 2080800 | 2209000  | 1957600  | 1956700  | 1741000  | 2164200  |
| LIPID-P-0758 | SM(d18:1/24:1) | 鞘脂类 SM(d18:1/24:1)  | SL      | 鞘脂类    | SM       | 鞘脂类    | C47H93N2O6P  | 911930  | 142000  | 2591900 | 1686600 | 1405500 | 1442900 | 1650800  | 1376300 | 1816300  | 1585800 | 1807800  | 1626100  | 1810400  | 1778700  | 1561100  |
| LIPID-P-0759 | SM(d18:1/25:1) | 鞘脂类 SM(d18:1/25:1)  | SL      | 鞘脂类    | SM       | 鞘脂类    | C48H95N2O6P  | 148930  | 291920  | 886410  | 263580  | 264230  | 242140  | 347020   | 322710  | 391350   | 282050  | 369010   | 369100   | 406000   | 368550   | 295790   |
| LIPID-P-0760 | SM(d18:1/26:1) | 鞘脂类 SM(d18:1/26:1)  | SL      | 鞘脂类    | SM       | 鞘脂类    | C49H97N2O6P  | 119950  | 174520  | 341010  | 173810  | 167850  | 152870  | 178720   | 146820  | 214900   | 170550  | 212960   | 161950   | 184850   | 197090   | 157940   |
| LIPID-P-0761 | SM(d18:2/18:1) | 鞘脂类 SM(d18:2/18:1)  | SL      | 鞘脂类    | SM       | 鞘脂类    | C41H79N2O6P  | 159770  | 341690  | 398140  | 294760  | 291730  | 357450  | 475540   | 468680  | 454210   | 390850  | 690330   | 560550   | 588620   | 637390   | 451500   |
| LIPID-P-0762 | SM(d18:2/20:1) | 鞘脂类 SM(d18:2/20:1)  | SL      | 鞘脂类    | SM       | 鞘脂类    | C43H83N2O6P  | 131960  | 210740  | 239600  | 279780  | 170110  | 252770  | 279050   | 345600  | 302550   | 252050  | 302150   | 180390   | 253160   | 299320   | 253810   |
| LIPID-P-0763 | SM(d18:2/22:1) | 鞘脂类 SM(d18:2/22:1)  | SL      | 鞘脂类    | SM       | 鞘脂类    | C45H87N2O6P  | 5061300 | 9046600 | 6463500 | 9379600 | 8471000 | 8408200 | 7819700  | 9664400 | 7052900  | 8477800 | 9252300  | 7043300  | 9288000  | 7673800  |          |
| LIPID-P-0764 | SM(d18:2/23:1) | 鞘脂类 SM(d18:2/23:1)  | SL      | 鞘脂类    | SM       | 鞘脂类    | C46H89N2O6P  | 501670  | 534270  | 232000  | 774360  | 650800  | 858010  | 856590   | 527400  | 834640   | 789690  | 684030   | 777170   | 1255700  | 767680   | 789670   |
| LIPID-P-0765 | SM(d18:2/24:1) | 鞘脂类 SM(d18:2/24:1)  | SL      | 鞘脂类    | SM       | 鞘脂类    | C47H91N2O6P  | 118340  | 111520  | 135990  | 152450  | 140280  | 168210  | 165490   | 158270  | 126020   | 320360  | 194860   | 208590   | 269780   | 204820   |          |
| LIPID-P-0766 | SM(d18:2/25:1) | 鞘脂类 SM(d18:2/25:1)  | SL      | 鞘脂类    | SM       | 鞘脂类    | C48H93N2O6P  | 46290   | 105970  | 288470  | 104240  | 97895   | 105890  | 199730   | 95289   | 153210   | 113210  | 117660   | 158850   | 304480   | 132030   | 166000   |
| LIPID-P-0767 | SM(d18:2/26:1) | 鞘脂类 SM(d18:2/26:1)  | SL      | 鞘脂类    | SM       | 鞘脂类    | C49H95N2O6P  | 44591   | 77968   | 82395   | 131740  | 65424   | 72689   | 91379    | 74323   | 79144    | 72123   | 91786    | 71209    | 88958    | 78587    | 78620    |
| LIPID-P-0768 | SM(d18:2/24:3) | 鞘脂类 SM(d18:2/24:3)  | SL      | 鞘脂类    | SM       | 鞘脂类    | C47H87N2O6P  | 7245500 | 7252000 | 3735300 | 6209600 | 7518100 | 5312800 | 6618100  | 6464600 | 6439100  | 5521100 | 7060600  | 7998200  | 7972700  | 7054900  | 7139600  |

| Index        | Compounds          | 物质                      | Class I | 物质一级分类 | Class II | 物质二级分类 | Formula   | ND1      | ND2      | ND3      | ND4       | ND5       | HF1       | HF2       | HF3      | HF4      | HF5       | AST-H1   | AST-H2   | AST-H3   | AST-H4   | AST-H5   |
|--------------|--------------------|-------------------------|---------|--------|----------|--------|-----------|----------|----------|----------|-----------|-----------|-----------|-----------|----------|----------|-----------|----------|----------|----------|----------|----------|
| LIPID-P-0832 | TG(14:0_15:0_16:1) | 甘油三酯_TG(14:0_15:0_16:1) | GL      | 甘油酯类   | TG       | 甘油三酯   | C48H96O6  | 146990   | 217250   | 165550   | 95656     | 131320    | 163790    | 167900    | 205830   | 81589    | 145730    | 128770   | 276400   | 111300   | 93378    | 128410   |
| LIPID-P-0833 | TG(12:0_16:0_18:1) | 甘油三酯_TG(12:0_16:0_18:1) | GL      | 甘油酯类   | TG       | 甘油三酯   | C49H92O6  | 266030   | 1701500  | 1230700  | 2577500   | 1814800   | 1969000   | 1329400   | 1678700  | 1054800  | 2120700   | 350390   | 494840   | 260300   | 550510   | 596810   |
| LIPID-P-0834 | TG(14:0_16:0_16:1) | 甘油三酯_TG(14:0_16:0_16:1) | GL      | 甘油酯类   | TG       | 甘油三酯   | C49H92O6  | 1183600  | 6060300  | 2858100  | 7480600   | 6175500   | 5952200   | 4222900   | 4233200  | 3142200  | 6875100   | 1047700  | 1148300  | 433520   | 884480   | 1276300  |
| LIPID-P-0835 | TG(15:0_16:0_16:1) | 甘油三酯_TG(15:0_16:0_16:1) | GL      | 甘油酯类   | TG       | 甘油三酯   | C50H94O6  | 2298700  | 1250700  | 961620   | 944440    | 1378700   | 1763000   | 899540    | 902650   | 843140   | 1544500   | 388910   | 908800   | 266110   | 499910   | 507600   |
| LIPID-P-0836 | TG(14:0_15:0_18:1) | 甘油三酯_TG(14:0_15:0_18:1) | GL      | 甘油酯类   | TG       | 甘油三酯   | C50H94O6  | 489460   | 391340   | 333750   | 436840    | 361520    | 516130    | 334780    | 348140   | 288590   | 419510    | 124900   | 252810   | 98338    | 151930   | 189620   |
| LIPID-P-0837 | TG(16:0_16:0_16:1) | 甘油三酯_TG(16:0_16:0_16:1) | GL      | 甘油酯类   | TG       | 甘油三酯   | C51H96O6  | 12504000 | 88082000 | 31664000 | 82801000  | 89535000  | 88707000  | 46124000  | 49694000 | 37250000 | 93342000  | 18803000 | 10336000 | 5271800  | 17302000 | 12987000 |
| LIPID-P-0838 | TG(14:0_16:0_18:1) | 甘油三酯_TG(14:0_16:0_18:1) | GL      | 甘油酯类   | TG       | 甘油三酯   | C51H96O6  | 40258000 | 18127000 | 10823000 | 31472000  | 29705000  | 23388000  | 15835000  | 21799000 | 11007000 | 27808000  | 6263100  | 4664800  | 1580300  | 5622900  | 6054400  |
| LIPID-P-0841 | TG(15:0_16:0_18:1) | 甘油三酯_TG(15:0_16:0_18:1) | GL      | 甘油酯类   | TG       | 甘油三酯   | C52H98O6  | 6561700  | 5604600  | 3464500  | 5592200   | 5972400   | 6543900   | 4482700   | 4639400  | 4152500  | 8757300   | 1653900  | 1770500  | 552050   | 1657300  | 1716700  |
| LIPID-P-0843 | TG(16:0_16:0_18:1) | 甘油三酯_TG(16:0_16:0_18:1) | GL      | 甘油酯类   | TG       | 甘油三酯   | C53H100O6 | 48694000 | 48952000 | 20671000 | 60291000  | 49588000  | 64076000  | 21255000  | 36312000 | 24062000 | 64965000  | 12278000 | 10111000 | 4141900  | 11853000 | 11615000 |
| LIPID-P-0845 | TG(16:0_17:0_18:1) | 甘油三酯_TG(16:0_17:0_18:1) | GL      | 甘油酯类   | TG       | 甘油三酯   | C54H102O6 | 15883000 | 10341000 | 4227300  | 13490000  | 12594000  | 23881000  | 12298000  | 11739000 | 9095800  | 27885000  | 2798500  | 2238700  | 660780   | 3213800  | 2646200  |
| LIPID-P-0847 | TG(16:0_18:0_18:1) | 甘油三酯_TG(16:0_18:0_18:1) | GL      | 甘油酯类   | TG       | 甘油三酯   | C55H104O6 | 80051000 | 53274000 | 23016000 | 106160000 | 93384000  | 95473000  | 52063000  | 83333000 | 37845000 | 82686000  | 14418000 | 12636000 | 5202800  | 15678000 | 20386000 |
| LIPID-P-0848 | TG(16:0_16:1_20:0) | 甘油三酯_TG(16:0_16:1_20:0) | GL      | 甘油酯类   | TG       | 甘油三酯   | C55H104O6 | 3146440  | 423440   | 190680   | 1721300   | 860780    | 1478700   | 573680    | 1448500  | 396210   | 2129100   | 148400   | 122200   | 14797    | 136180   | 182730   |
| LIPID-P-0849 | TG(17:0_18:0_18:1) | 甘油三酯_TG(17:0_18:0_18:1) | GL      | 甘油酯类   | TG       | 甘油三酯   | C56H106O6 | 257910   | 170610   | 71566    | 304290    | 324270    | 296600    | 311380    | 315730   | 157980   | 515820    | 63951    | 67206    | 18567    | 76890    | 95190    |
| LIPID-P-0850 | TG(17:0_17:0_19:1) | 甘油三酯_TG(17:0_17:0_19:1) | GL      | 甘油酯类   | TG       | 甘油三酯   | C56H106O6 | 121350   | 80655    | 25833    | 88143     | 101470    | 139440    | 86677     | 104690   | 53774    | 171340    | 12775    | 18890    | 7092.5   | 21039    | 25253    |
| LIPID-P-0851 | TG(16:0_18:0_20:1) | 甘油三酯_TG(16:0_18:0_20:1) | GL      | 甘油酯类   | TG       | 甘油三酯   | C57H108O6 | 1382900  | 778680   | 354770   | 1953400   | 1189100   | 1338900   | 950010    | 1391900  | 555670   | 2131300   | 209710   | 259130   | 172760   | 202290   | 311480   |
| LIPID-P-0852 | TG(18:0_18:0_18:1) | 甘油三酯_TG(18:0_18:0_18:1) | GL      | 甘油酯类   | TG       | 甘油三酯   | C57H108O6 | 3932800  | 4772000  | 1677500  | 7684500   | 4312100   | 6083600   | 4652400   | 5656300  | 4890300  | 10895000  | 1219800  | 2483300  | 1842700  | 1117900  | 1945700  |
| LIPID-P-0853 | TG(16:0_20:0_18:1) | 甘油三酯_TG(16:0_20:0_18:1) | GL      | 甘油酯类   | TG       | 甘油三酯   | C57H108O6 | 24866000 | 4955800  | 1560400  | 24273000  | 8270400   | 25408000  | 7892900   | 15896000 | 6172200  | 27692000  | 2041400  | 1843900  | 325490   | 2010200  | 3093400  |
| LIPID-P-0856 | TG(18:0_18:1_20:0) | 甘油三酯_TG(18:0_18:1_20:0) | GL      | 甘油酯类   | TG       | 甘油三酯   | C58H112O6 | 204460   | 89578    | 35092    | 158380    | 76515     | 219740    | 95533     | 143160   | 81176    | 354020    | 24377    | 29244    | 12298    | 28655    | 51307    |
| LIPID-P-0858 | TG(16:0_18:1_22:0) | 甘油三酯_TG(16:0_18:1_22:0) | GL      | 甘油酯类   | TG       | 甘油三酯   | C59H112O6 | 774980   | 141470   | 48481    | 483760    | 215660    | 582040    | 119920    | 236720   | 121930   | 451260    | 53917    | 74694    | 22874    | 59683    | 61496    |
| LIPID-P-0862 | TG(16:0_23:0_18:1) | 甘油三酯_TG(16:0_23:0_18:1) | GL      | 甘油酯类   | TG       | 甘油三酯   | C60H114O6 | 30276    | 9        | 11980    | 17289     | 12069     | 10111     | 12269     | 8010.6   | 9048.4   | 16018     | 5736.2   | 10360    | 9        | 9        | 51348    |
| LIPID-P-0866 | TG(16:0_24:0_18:1) | 甘油三酯_TG(16:0_24:0_18:1) | GL      | 甘油酯类   | TG       | 甘油三酯   | C61H116O6 | 140100   | 31329    | 21305    | 109460    | 51613     | 64284     | 23221     | 50012    | 17498    | 57149     | 11905    | 11445    | 4280.3   | 9005     | 18161    |
| LIPID-P-0878 | TG(8:0_16:1_18:1)  | 甘油三酯_TG(8:0_16:1_18:1)  | GL      | 甘油酯类   | TG       | 甘油三酯   | C45H82O6  | 55351    | 30406    | 55450    | 113700    | 35930     | 132790    | 85533     | 62627    | 70388    | 96653     | 20312    | 12791    | 18049    | 37575    | 14725    |
| LIPID-P-0880 | TG(8:0_16:0_18:2)  | 甘油三酯_TG(8:0_16:0_18:2)  | GL      | 甘油酯类   | TG       | 甘油三酯   | C45H82O6  | 55802    | 18988    | 44397    | 51594     | 31703     | 87129     | 124990    | 69944    | 90712    | 131490    | 110010   | 69029    | 51535    | 125890   | 93807    |
| LIPID-P-0882 | TG(9:0_16:0_18:2)  | 甘油三酯_TG(9:0_16:0_18:2)  | GL      | 甘油酯类   | TG       | 甘油三酯   | C46H84O6  | 74529    | 19599    | 6259.4   | 23019     | 14379     | 69363     | 75298     | 62055    | 70153    | 100830    | 27312    | 70000    | 8252.7   | 42075    | 42120    |
| LIPID-P-0886 | TG(12:0_14:0_18:2) | 甘油三酯_TG(12:0_14:0_18:2) | GL      | 甘油酯类   | TG       | 甘油三酯   | C47H86O6  | 133260   | 93058    | 200120   | 66680     | 122520    | 85568     | 58310     | 73600    | 85886    | 96212     | 45953    | 120680   | 55466    | 62209    | 72566    |
| LIPID-P-0887 | TG(14:0_14:1_18:1) | 甘油三酯_TG(14:0_14:1_18:1) | GL      | 甘油酯类   | TG       | 甘油三酯   | C47H86O6  | 193840   | 159810   | 262620   | 156580    | 174860    | 156000    | 100160    | 144820   | 118350   | 102900    | 70636    | 234210   | 53591    | 134640   | 80038    |
| LIPID-P-0888 | TG(10:0_16:0_18:2) | 甘油三酯_TG(10:0_16:0_18:2) | GL      | 甘油酯类   | TG       | 甘油三酯   | C47H86O6  | 136230   | 77216    | 226830   | 109100    | 96223     | 173890    | 270570    | 153520   | 278820   | 206810    | 128520   | 161410   | 91871    | 155030   | 199630   |
| LIPID-P-0893 | TG(10:0_16:0_18:2) | 甘油三酯_TG(10:0_16:0_18:2) | GL      | 甘油酯类   | TG       | 甘油三酯   | C49H90O6  | 494610   | 414680   | 897910   | 386600    | 364600    | 645540    | 523930    | 410220   | 410870   | 531950    | 384500   | 460210   | 241530   | 373460   | 552780   |
| LIPID-P-0894 | TG(14:0_14:1_18:1) | 甘油三酯_TG(14:0_14:1_18:1) | GL      | 甘油酯类   | TG       | 甘油三酯   | C49H90O6  | 1352300  | 1117800  | 1727000  | 1267000   | 1173500   | 1341200   | 909630    | 997070   | 742130   | 1149800   | 377630   | 322400   | 222190   | 391190   | 395450   |
| LIPID-P-0895 | TG(14:1_16:0_16:1) | 甘油三酯_TG(14:1_16:0_16:1) | GL      | 甘油酯类   | TG       | 甘油三酯   | C49H90O6  | 2609500  | 1209200  | 2816200  | 1241200   | 2068600   | 2042100   | 791930    | 1335600  | 694420   | 1346100   | 229520   | 528650   | 154390   | 418850   | 332710   |
| LIPID-P-0897 | TG(14:0_16:1_17:1) | 甘油三酯_TG(14:0_16:1_17:1) | GL      | 甘油酯类   | TG       | 甘油三酯   | C50H92O6  | 342730   | 172800   | 178020   | 236560    | 237720    | 340190    | 218570    | 195200   | 164100   | 377720    | 110040   | 210160   | 55537    | 96628    | 96701    |
| LIPID-P-0898 | TG(14:0_15:0_18:2) | 甘油三酯_TG(14:0_15:0_18:2) | GL      | 甘油酯类   | TG       | 甘油三酯   | C50H92O6  | 132580   | 88914    | 154380   | 54143     | 70819     | 146950    | 135010    | 133300   | 113250   | 235270    | 79855    | 137160   | 66118    | 90233    | 173140   |
| LIPID-P-0899 | TG(15:0_16:1_16:1) | 甘油三酯_TG(15:0_16:1_16:1) | GL      | 甘油酯类   | TG       | 甘油三酯   | C50H92O6  | 643640   | 260060   | 337410   | 208330    | 386190    | 391340    | 308820    | 317430   | 266680   | 548430    | 156980   | 332980   | 86754    | 159120   | 224470   |
| LIPID-P-0901 | TG(16:0_16:1_16:1) | 甘油三酯_TG(16:0_16:1_16:1) | GL      | 甘油酯类   | TG       | 甘油三酯   | C51H94O6  | 6196000  | 33827000 | 31052000 | 45412000  | 43392000  | 56117000  | 31278000  | 42653000 | 18278000 | 50325000  | 12345000 | 7992300  | 4482900  | 11635000 | 13557000 |
| LIPID-P-0902 | TG(14:0_16:0_18:2) | 甘油三酯_TG(14:0_16:0_18:2) | GL      | 甘油酯类   | TG       | 甘油三酯   | C51H94O6  | 847300   | 482680   | 559800   | 605550    | 414980    | 921850    | 549340    | 576220   | 447060   | 933790    | 416030   | 250950   | 1692900  | 348730   | 527000   |
| LIPID-P-0904 | TG(14:0_16:1_18:1) | 甘油三酯_TG(14:0_16:1_18:1) | GL      | 甘油酯类   | TG       | 甘油三酯   | C51H94O6  | 3006900  | 1725500  | 1608900  | 2423400   | 2300400   | 5380600   | 1390200   | 2486200  | 1408000  | 3231000   | 8529600  | 563480   | 280990   | 623230   | 631220   |
| LIPID-P-0906 | TG(16:0_16:1_17:1) | 甘油三酯_TG(16:0_16:1_17:1) | GL      | 甘油酯类   | TG       | 甘油三酯   | C52H96O6  | 5849200  | 3456300  | 1627600  | 3220700   | 4144600   | 5803600   | 3965900   | 3433600  | 1649400  | 5185500   | 1221900  | 903810   | 272800   | 1069200  | 812440   |
| LIPID-P-0907 | TG(15:0_16:0_18:2) | 甘油三酯_TG(15:0_16:0_18:2) | GL      | 甘油酯类   | TG       | 甘油三酯   | C52H96O6  | 1281900  | 854850   | 888480   | 600920    | 1003200   | 1284100   | 1189700   | 1254900  | 883930   | 1716900   | 1002700  | 1174400  | 400470   | 1293500  | 1765700  |
| LIPID-P-0908 | TG(15:0_16:1_18:1) | 甘油三酯_TG(15:0_16:1_18:1) | GL      | 甘油酯类   | TG       | 甘油三酯   | C52H96O6  | 5499200  | 3219800  | 2399800  | 2742700   | 4686200   | 5652300   | 3519200   | 3392900  | 2682100  | 5209500   | 1860800  | 1728400  | 683550   | 2176500  | 2258400  |
| LIPID-P-0910 | TG(16:0_16:1_18:1) | 甘油三酯_TG(16:0_16:1_18:1) | GL      | 甘油酯类   | TG       | 甘油三酯   | C53H98O6  | 14568000 | 88947000 | 61831000 | 117490000 | 108400000 | 186280000 | 110620000 | 98169000 | 61077000 | 180030000 | 35246000 | 25417000 | 13375000 | 27346000 | 38111000 |
| LIPID-P-0911 | TG(14:0_18:0_18:2) | 甘油三酯_TG(14:0_18:0_18:2) | GL      | 甘油酯类   | TG       | 甘油三酯   | C53H98O6  | 1739000  | 1662200  | 5630700  | 1662200   | 1336600   | 1921100   | 1302800   | 1344500  | 7024800  | 1750700   | 355600   | 185150   | 86630    | 282980   | 282340   |
| LIPID-P-0913 | TG(15:0_17:0_19:2) | 甘油三酯_TG(15:0_17:0_19:2) | GL      | 甘油酯类   | TG       | 甘油三酯   | C54H100O6 | 1347700  | 1313800  | 576060   | 1722800   | 1157100   | 2127100   | 1506600   | 1351700  | 1489100  | 2411900   | 552840   | 522740   | 163920   | 811750   | 571070   |
| LIPID-P-0914 | TG(16:0_17:1_18:1) | 甘油三酯_TG(16:0_17:1_18:1) | GL      | 甘油酯类   | TG       | 甘油三酯   | C54H100O6 | 4303600  | 3143500  | 1001700  | 4090600   | 3216900   | 4876400   | 3437600   | 3842800  | 2999000  | 5435200   | 1145500  | 664570   | 210870   | 1126000  | 964560   |
| LIPID-P-0915 | TG(16:0_18:1_18:1) | 甘油三酯_TG(16:0_18:1_18:1) | GL      | 甘油酯类   | TG       | 甘油三酯   | C55H102O6 | 40718000 | 31925000 | 19281000 | 52795000  | 37717000  | 53468000  | 32910000  | 35427000 | 28059000 | 53343000  | 20648000 | 84245000 | 8144800  | 18870000 | 20785000 |
| LIPID-P-0917 | TG(16:0_16:        |                         |         |        |          |        |           |          |          |          |           |           |           |           |          |          |           |          |          |          |          |          |

| Index        | Compounds          | 物质                      | Class I | 物质一级分类 | Class II | 物质二级分类 | Formula   | ND1      | ND2      | ND3      | ND4      | ND5      | HF1      | HF2      | HF3      | HF4      | HF5      | AST-H1   | AST-H2   | AST-H3   | AST-H4   | AST-H5   |
|--------------|--------------------|-------------------------|---------|--------|----------|--------|-----------|----------|----------|----------|----------|----------|----------|----------|----------|----------|----------|----------|----------|----------|----------|----------|
| LIPID-P-0962 | TG(10.0_18.1_18.2) | 甘油三酯_TG(10.0_18.1_18.2) | GL      | 甘油酯类   | TG       | 甘油三酯   | C49H88O6  | 193820   | 142770   | 344860   | 187460   | 205360   | 226890   | 258530   | 205410   | 175640   | 258940   | 167700   | 133650   | 64569    | 105370   | 73383    |
| LIPID-P-0965 | TG(14.1_16.1_18.1) | 甘油三酯_TG(14.1_16.1_18.1) | GL      | 甘油酯类   | TG       | 甘油三酯   | C51H92O6  | 335800   | 212010   | 477650   | 250260   | 226030   | 444780   | 173840   | 223810   | 191600   | 379050   | 118450   | 920620   | 32030    | 155810   | 136700   |
| LIPID-P-0967 | TG(14.0_16.1_18.2) | 甘油三酯_TG(14.0_16.1_18.2) | GL      | 甘油酯类   | TG       | 甘油三酯   | C51H92O6  | 410400   | 222880   | 324140   | 183060   | 321490   | 534700   | 315250   | 327190   | 227990   | 562800   | 234180   | 113720   | 461520   | 224520   | 255700   |
| LIPID-P-0969 | TG(16.0_14.1_18.2) | 甘油三酯_TG(16.0_14.1_18.2) | GL      | 甘油酯类   | TG       | 甘油三酯   | C51H92O6  | 394900   | 185100   | 492680   | 205430   | 254420   | 417100   | 178530   | 250500   | 201310   | 452410   | 197190   | 172130   | 839920   | 229420   | 246760   |
| LIPID-P-0970 | TG(16.1_16.1_17.1) | 甘油三酯_TG(16.1_16.1_17.1) | GL      | 甘油酯类   | TG       | 甘油三酯   | C52H94O6  | 258900   | 151730   | 160900   | 149030   | 201920   | 377360   | 166630   | 237490   | 140220   | 333010   | 107120   | 929310   | 311460   | 121330   | 106320   |
| LIPID-P-0971 | TG(15.0_16.1_18.2) | 甘油三酯_TG(15.0_16.1_18.2) | GL      | 甘油酯类   | TG       | 甘油三酯   | C52H94O6  | 112710   | 517150   | 909600   | 347150   | 945250   | 124930   | 955740   | 129400   | 799110   | 155500   | 74720    | 622590   | 307330   | 110270   | 130740   |
| LIPID-P-0972 | TG(14.0_17.1_18.2) | 甘油三酯_TG(14.0_17.1_18.2) | GL      | 甘油酯类   | TG       | 甘油三酯   | C52H94O6  | 174670   | 89964    | 158310   | 106530   | 173380   | 336140   | 295320   | 282280   | 193500   | 423560   | 143750   | 77520    | 18132    | 183840   | 208010   |
| LIPID-P-0973 | TG(16.1_16.1_18.1) | 甘油三酯_TG(16.1_16.1_18.1) | GL      | 甘油酯类   | TG       | 甘油三酯   | C53H96O6  | 11755000 | 7536900  | 6699900  | 8350100  | 9450800  | 14599000 | 8555200  | 9381700  | 5375000  | 15265000 | 3163400  | 2411600  | 1084900  | 2919100  | 3435500  |
| LIPID-P-0974 | TG(16.0_16.1_18.2) | 甘油三酯_TG(16.0_16.1_18.2) | GL      | 甘油酯类   | TG       | 甘油三酯   | C53H96O6  | 35155000 | 20370000 | 19543000 | 20971000 | 28596000 | 38806000 | 19657000 | 22145000 | 14976000 | 35688000 | 9495000  | 6025000  | 3662900  | 11732000 | 10572000 |
| LIPID-P-0977 | TG(16.1_17.1_18.1) | 甘油三酯_TG(16.1_17.1_18.1) | GL      | 甘油酯类   | TG       | 甘油三酯   | C54H98O6  | 11277000 | 899630   | 444220   | 1104600  | 1031000  | 1601800  | 1000000  | 963500   | 751790   | 2281700  | 401220   | 188200   | 756750   | 379660   | 361670   |
| LIPID-P-0978 | TG(15.0_18.1_18.2) | 甘油三酯_TG(15.0_18.1_18.2) | GL      | 甘油酯类   | TG       | 甘油三酯   | C54H98O6  | 4995300  | 319780   | 380210   | 302840   | 460220   | 814700   | 909800   | 689370   | 702230   | 959470   | 863410   | 574850   | 206490   | 747900   | 902810   |
| LIPID-P-0979 | TG(16.0_17.1_18.2) | 甘油三酯_TG(16.0_17.1_18.2) | GL      | 甘油酯类   | TG       | 甘油三酯   | C54H98O6  | 854730   | 481480   | 384900   | 520450   | 599460   | 1257600  | 1068800  | 1258700  | 743860   | 1300500  | 786480   | 577710   | 225990   | 1034100  | 890420   |
| LIPID-P-0981 | TG(16.1_18.1_18.1) | 甘油三酯_TG(16.1_18.1_18.1) | GL      | 甘油酯类   | TG       | 甘油三酯   | C55H100O6 | 34909000 | 26889000 | 18182000 | 42102000 | 35848000 | 53350000 | 32353000 | 41890000 | 29372000 | 50436000 | 14986000 | 9986500  | 3329300  | 17215000 | 12321000 |
| LIPID-P-0982 | TG(16.0_18.1_18.2) | 甘油三酯_TG(16.0_18.1_18.2) | GL      | 甘油酯类   | TG       | 甘油三酯   | C55H100O6 | 29045000 | 22964000 | 17825000 | 23151000 | 23007000 | 39263000 | 35131000 | 37501000 | 26093000 | 35782000 | 30610000 | 26746000 | 15234000 | 37271000 | 36927000 |
| LIPID-P-0983 | TG(14.0_18.1_20.2) | 甘油三酯_TG(14.0_18.1_20.2) | GL      | 甘油酯类   | TG       | 甘油三酯   | C55H100O6 | 1911600  | 1042700  | 108510   | 147020   | 131570   | 202460   | 131500   | 186880   | 105650   | 194580   | 567140   | 618120   | 133670   | 670510   | 789050   |
| LIPID-P-0984 | TG(17.1_18.1_18.1) | 甘油三酯_TG(17.1_18.1_18.1) | GL      | 甘油酯类   | TG       | 甘油三酯   | C56H102O6 | 5027700  | 4140600  | 2630700  | 7265400  | 5380900  | 8498500  | 7282600  | 6321200  | 3809800  | 9712700  | 2719500  | 1222800  | 512480   | 2566100  | 2512800  |
| LIPID-P-0987 | TG(17.0_18.1_18.2) | 甘油三酯_TG(17.0_18.1_18.2) | GL      | 甘油酯类   | TG       | 甘油三酯   | C56H102O6 | 462810   | 376570   | 613810   | 379860   | 51140    | 1294600  | 1172200  | 923450   | 925380   | 1758500  | 976220   | 729680   | 235660   | 1232300  | 1162500  |
| LIPID-P-0988 | TG(18.1_18.1_18.1) | 甘油三酯_TG(18.1_18.1_18.1) | GL      | 甘油酯类   | TG       | 甘油三酯   | C57H104O6 | 72003000 | 71600000 | 56553000 | 93331000 | 92251000 | 84878000 | 73176000 | 75337000 | 63042000 | 91200000 | 38132000 | 29177000 | 11284000 | 44965000 | 3993000  |
| LIPID-P-0989 | TG(18.0_18.1_18.2) | 甘油三酯_TG(18.0_18.1_18.2) | GL      | 甘油酯类   | TG       | 甘油三酯   | C57H104O6 | 3956700  | 2584000  | 1824800  | 2703400  | 2856500  | 5575600  | 4293800  | 4279200  | 2867600  | 8012700  | 3097900  | 1997700  | 771890   | 3238400  | 4024500  |
| LIPID-P-0992 | TG(16.0_18.1_20.2) | 甘油三酯_TG(16.0_18.1_20.2) | GL      | 甘油酯类   | TG       | 甘油三酯   | C57H104O6 | 5677700  | 2445000  | 2277800  | 4577400  | 3956100  | 7079400  | 3467600  | 2606000  | 2564100  | 7111200  | 1315000  | 1205300  | 216030   | 1337500  | 1262900  |
| LIPID-P-0993 | TG(17.1_18.1_18.1) | 甘油三酯_TG(17.1_18.1_18.1) | GL      | 甘油酯类   | TG       | 甘油三酯   | C58H106O6 | 1957000  | 839030   | 103210   | 232820   | 188000   | 396430   | 199550   | 204620   | 130930   | 414040   | 38550    | 276060   | 56284    | 42970    | 436220   |
| LIPID-P-0996 | TG(18.1_18.1_20.1) | 甘油三酯_TG(18.1_18.1_20.1) | GL      | 甘油酯类   | TG       | 甘油三酯   | C58H106O6 | 941740   | 583490   | 734280   | 1415400  | 1059700  | 1692900  | 1193000  | 1121800  | 682620   | 2174800  | 188420   | 980750   | 299550   | 241350   | 219510   |
| LIPID-P-0998 | TG(18.1_18.2_20.0) | 甘油三酯_TG(18.1_18.2_20.0) | GL      | 甘油酯类   | TG       | 甘油三酯   | C59H108O6 | 10776000 | 12616000 | 8221200  | 30768000 | 15528000 | 21062000 | 13718000 | 11193000 | 11103000 | 24842000 | 2618200  | 2573000  | 534730   | 3517500  | 3712200  |
| LIPID-P-0999 | TG(18.1_18.1_20.1) | 甘油三酯_TG(18.1_18.1_20.1) | GL      | 甘油酯类   | TG       | 甘油三酯   | C59H108O6 | 5401400  | 7131300  | 5293600  | 16983000 | 9249500  | 11507000 | 8175800  | 8350100  | 4823000  | 13779000 | 1537100  | 1396100  | 301780   | 2070300  | 2623000  |
| LIPID-P-1001 | TG(20.1_18.2_18.0) | 甘油三酯_TG(20.1_18.2_18.0) | GL      | 甘油酯类   | TG       | 甘油三酯   | C59H108O6 | 2059100  | 1492200  | 1704200  | 2852700  | 1850400  | 431480   | 237870   | 259680   | 123340   | 473070   | 84004    | 906860   | 271290   | 90060    | 133510   |
| LIPID-P-1002 | TG(16.1_18.1_22.1) | 甘油三酯_TG(16.1_18.1_22.1) | GL      | 甘油酯类   | TG       | 甘油三酯   | C59H108O6 | 348400   | 859180   | 73500    | 1985400  | 130140   | 281380   | 104630   | 148770   | 735450   | 298110   | 282860   | 226910   | 30360    | 30110    | 321350   |
| LIPID-P-1005 | TG(21.0_18.1_18.2) | 甘油三酯_TG(21.0_18.1_18.2) | GL      | 甘油酯类   | TG       | 甘油三酯   | C60H110O6 | 1032500  | 357280   | 680490   | 757990   | 696860   | 1043900  | 757460   | 87010    | 51540    | 226300   | 116810   | 92362    | 22629    | 131650   | 164520   |
| LIPID-P-1006 | TG(16.1_17.1_24.1) | 甘油三酯_TG(16.1_17.1_24.1) | GL      | 甘油酯类   | TG       | 甘油三酯   | C60H110O6 | 94882    | 12767    | 19502    | 51162    | 36567    | 76425    | 39377    | 46158    | 25105    | 155930   | 76464    | 38829    | 16906    | 86548    | 45656    |
| LIPID-P-1007 | TG(16.1_18.1_24.1) | 甘油三酯_TG(16.1_18.1_24.1) | GL      | 甘油酯类   | TG       | 甘油三酯   | C61H112O6 | 316120   | 70262    | 157910   | 135260   | 122290   | 196090   | 94130    | 10840    | 53046    | 226120   | 15168    | 17499    | 95314    | 20045    | 26227    |
| LIPID-P-1009 | TG(18.1_18.1_21.1) | 甘油三酯_TG(18.1_18.1_21.1) | GL      | 甘油酯类   | TG       | 甘油三酯   | C61H112O6 | 537720   | 1446100  | 1917700  | 4951700  | 1595800  | 4977100  | 2619200  | 284000   | 152900   | 910120   | 339140   | 336320   | 95178    | 527230   | 635850   |
| LIPID-P-1010 | TG(18.1_18.2_22.0) | 甘油三酯_TG(18.1_18.2_22.0) | GL      | 甘油酯类   | TG       | 甘油三酯   | C61H112O6 | 326500   | 90169    | 230220   | 194630   | 17430    | 373290   | 147830   | 173920   | 111330   | 594880   | 156160   | 134280   | 42368    | 138130   | 225110   |
| LIPID-P-1011 | TG(18.1_20.1_20.1) | 甘油三酯_TG(18.1_20.1_20.1) | GL      | 甘油酯类   | TG       | 甘油三酯   | C61H112O6 | 3992200  | 3430500  | 5052200  | 10175000 | 4130300  | 9413500  | 4176000  | 3772000  | 2658300  | 1274600  | 450980   | 470200   | 81305    | 677800   | 664270   |
| LIPID-P-1017 | TG(18.1_18.1_24.1) | 甘油三酯_TG(18.1_18.1_24.1) | GL      | 甘油酯类   | TG       | 甘油三酯   | C63H116O6 | 138500   | 80294    | 150050   | 162270   | 88718    | 112080   | 68670    | 80948    | 45097    | 230480   | 11623    | 17295    | 12356    | 19184    | 24637    |
| LIPID-P-1019 | TG(18.1_20.1_22.1) | 甘油三酯_TG(18.1_20.1_22.1) | GL      | 甘油酯类   | TG       | 甘油三酯   | C63H116O6 | 168580   | 51746    | 96447    | 148500   | 89926    | 196550   | 79810    | 104930   | 39472    | 352880   | 81869    | 17048    | 9        | 12412    | 19197    |
| LIPID-P-1020 | TG(24.0_18.1_18.2) | 甘油三酯_TG(24.0_18.1_18.2) | GL      | 甘油酯类   | TG       | 甘油三酯   | C63H116O6 | 96359    | 64336    | 18411    | 10525    | 64502    | 13739    | 9941     | 7118     | 7068.3   | 22244    | 11723    | 17506    | 2978.2   | 11574    | 25599    |
| LIPID-P-1023 | TG(18.1_18.1_26.1) | 甘油三酯_TG(18.1_18.1_26.1) | GL      | 甘油酯类   | TG       | 甘油三酯   | C65H120O6 | 18378    | 7118.4   | 21055    | 17984    | 12489    | 14238    | 9265.2   | 9792.5   | 4583.9   | 25288    | 9        | 9        | 9        | 9        | 9        |
| LIPID-P-1027 | TG(14.1_16.1_16.2) | 甘油三酯_TG(14.1_16.1_16.2) | GL      | 甘油酯类   | TG       | 甘油三酯   | C49H88O6  | 24344    | 21684    | 175360   | 52532    | 38823    | 55297    | 61838    | 56272    | 31448    | 67545    | 51742    | 43296    | 17025    | 55934    | 42653    |
| LIPID-P-1029 | TG(16.1_16.1_16.2) | 甘油三酯_TG(16.1_16.1_16.2) | GL      | 甘油酯类   | TG       | 甘油三酯   | C51H90O6  | 335370   | 144190   | 275550   | 225680   | 316100   | 455630   | 234610   | 433620   | 211270   | 575000   | 166690   | 171030   | 70935    | 219460   | 257930   |
| LIPID-P-1030 | TG(14.1_16.1_18.2) | 甘油三酯_TG(14.1_16.1_18.2) | GL      | 甘油酯类   | TG       | 甘油三酯   | C51H90O6  | 682730   | 565880   | 173350   | 47580    | 765340   | 728770   | 447830   | 61040    | 369020   | 908920   | 425950   | 431100   | 266190   | 526630   | 73230    |
| LIPID-P-1031 | TG(12.0_18.2_18.2) | 甘油三酯_TG(12.0_18.2_18.2) | GL      | 甘油酯类   | TG       | 甘油三酯   | C51H90O6  | 90083    | 62343    | 309320   | 80619    | 103970   | 171200   | 97638    | 287290   | 159350   | 160500   | 270320   | 328380   | 133410   | 333820   | 510760   |
| LIPID-P-1032 | TG(12.0_18.1_18.3) | 甘油三酯_TG(12.0_18.1_18.3) | GL      | 甘油酯类   | TG       | 甘油三酯   | C51H90O6  | 135840   | 152600   | 647570   | 178840   | 180390   | 329200   | 180520   | 301950   | 117580   | 314030   | 2        |          |          |          |          |

| Index        | Compounds          | 物质                      | Class I | 物质一級分类 | Class II | 物质二級分类 | Formula    | ND1      | ND2      | ND3       | ND4      | ND5      | HF1       | HF2      | HF3      | HF4       | HF5       | AST-H1    | AST-H2   | AST-H3   | AST-H4    | AST-H5   |
|--------------|--------------------|-------------------------|---------|--------|----------|--------|------------|----------|----------|-----------|----------|----------|-----------|----------|----------|-----------|-----------|-----------|----------|----------|-----------|----------|
| LIPID-P-1082 | TG(12.0_18.2_18.3) | 甘油三酯_TG(12.0_18.2_18.3) | GL      | 甘油酯类   | TG       | 甘油三酯   | C51H88O6   | 34621    | 24019    | 215180    | 22717    | 44842    | 188409    | 52995    | 83974    | 34403     | 64023     | 94954     | 109660   | 68012    | 137260    | 106920   |
| LIPID-P-1083 | TG(14.1_16.1_18.3) | 甘油三酯_TG(14.1_16.1_18.3) | GL      | 甘油酯类   | TG       | 甘油三酯   | C51H88O6   | 52886    | 51588    | 163360    | 52204    | 90986    | 178749    | 53271    | 71949    | 61053     | 186220    | 67053     | 57624    | 56257    | 95120     | 90688    |
| LIPID-P-1086 | TG(16.1_16.1_18.3) | 甘油三酯_TG(16.1_16.1_18.3) | GL      | 甘油酯类   | TG       | 甘油三酯   | C53H92O6   | 177010   | 1491700  | 2169500   | 1257300  | 1775500  | 2758200   | 1371100  | 2191600  | 1303800   | 3561400   | 1723900   | 893570   | 676550   | 1940800   | 1439100  |
| LIPID-P-1087 | TG(14.0_18.2_18.3) | 甘油三酯_TG(14.0_18.2_18.3) | GL      | 甘油酯类   | TG       | 甘油三酯   | C53H92O6   | 60960    | 486650   | 1399200   | 459810   | 653780   | 1098000   | 762200   | 1269100  | 747510    | 1680300   | 1936700   | 1215500  | 693490   | 2401900   | 1836200  |
| LIPID-P-1088 | TG(14.1_18.2_18.2) | 甘油三酯_TG(14.1_18.2_18.2) | GL      | 甘油酯类   | TG       | 甘油三酯   | C53H92O6   | 472880   | 373200   | 1377200   | 372110   | 522770   | 602220    | 445670   | 664110   | 508130    | 838070    | 924250    | 512200   | 355810   | 964220    | 611950   |
| LIPID-P-1089 | TG(12.0_16.0_22.5) | 甘油三酯_TG(12.0_16.0_22.5) | GL      | 甘油酯类   | TG       | 甘油三酯   | C53H92O6   | 398280   | 316770   | 692170    | 304860   | 369750   | 983270    | 519710   | 660890   | 594990    | 1506600   | 998520    | 631240   | 285950   | 1135500   | 1186700  |
| LIPID-P-1090 | TG(14.0_16.1_20.4) | 甘油三酯_TG(14.0_16.1_20.4) | GL      | 甘油酯类   | TG       | 甘油三酯   | C53H92O6   | 1125500  | 992620   | 2049200   | 1111400  | 1278000  | 1610500   | 1009300  | 907760   | 927250    | 1677400   | 614920    | 542130   | 142960   | 703510    | 839040   |
| LIPID-P-1091 | TG(15.0_16.1_20.4) | 甘油三酯_TG(15.0_16.1_20.4) | GL      | 甘油酯类   | TG       | 甘油三酯   | C54H94O6   | 117880   | 58434    | 99446     | 60488    | 69559    | 224130    | 177270   | 143370   | 130530    | 276900    | 142470    | 61828    | 40436    | 162660    | 201520   |
| LIPID-P-1092 | TG(15.0_18.2_18.3) | 甘油三酯_TG(15.0_18.2_18.3) | GL      | 甘油酯类   | TG       | 甘油三酯   | C54H94O6   | 73135    | 41265    | 161100    | 56866    | 69255    | 189360    | 182560   | 240210   | 198720    | 330150    | 384640    | 183310   | 92377    | 368120    | 436160   |
| LIPID-P-1094 | TG(16.1_17.1_18.3) | 甘油三酯_TG(16.1_17.1_18.3) | GL      | 甘油酯类   | TG       | 甘油三酯   | C54H94O6   | 95738    | 62194    | 151790    | 38994    | 126260   | 169340    | 168250   | 285130   | 176150    | 400640    | 315880    | 221720   | 71007    | 429660    | 441090   |
| LIPID-P-1095 | TG(16.1_18.2_18.2) | 甘油三酯_TG(16.1_18.2_18.2) | GL      | 甘油酯类   | TG       | 甘油三酯   | C55H96O6   | 22147000 | 16411000 | 29443000  | 15290000 | 26126000 | 65183000  | 50151000 | 46552000 | 36177000  | 76761000  | 102940000 | 63559000 | 19390000 | 120180000 | 93027000 |
| LIPID-P-1096 | TG(16.0_18.2_18.3) | 甘油三酯_TG(16.0_18.2_18.3) | GL      | 甘油酯类   | TG       | 甘油三酯   | C55H96O6   | 9316600  | 7324000  | 14642000  | 6456400  | 12163000 | 19149000  | 18447000 | 16549000 | 12898000  | 29093000  | 29828000  | 22608000 | 7056800  | 28687000  | 38873000 |
| LIPID-P-1097 | TG(16.1_18.1_18.3) | 甘油三酯_TG(16.1_18.1_18.3) | GL      | 甘油酯类   | TG       | 甘油三酯   | C55H96O6   | 18822000 | 15294000 | 26729000  | 12584000 | 19222000 | 42163000  | 33772000 | 36067000 | 26242000  | 48641000  | 45115000  | 37262000 | 11633000 | 60097000  | 58763000 |
| LIPID-P-1098 | TG(16.0_16.1_20.4) | 甘油三酯_TG(16.0_16.1_20.4) | GL      | 甘油酯类   | TG       | 甘油三酯   | C55H96O6   | 19200000 | 13070000 | 27481000  | 8679800  | 16442000 | 24841000  | 12423000 | 14102000 | 8069600   | 24466000  | 5948300   | 5916700  | 2382100  | 7970100   | 9774300  |
| LIPID-P-1099 | TG(14.0_16.0_22.5) | 甘油三酯_TG(14.0_16.0_22.5) | GL      | 甘油酯类   | TG       | 甘油三酯   | C55H96O6   | 175580   | 141030   | 447400    | 123380   | 266380   | 282330    | 245350   | 347610   | 192130    | 499250    | 726200    | 407650   | 137420   | 748650    | 720960   |
| LIPID-P-1100 | TG(16.0_17.1_20.4) | 甘油三酯_TG(16.0_17.1_20.4) | GL      | 甘油酯类   | TG       | 甘油三酯   | C56H98O6   | 285250   | 179840   | 377730    | 177110   | 308420   | 462120    | 285320   | 320190   | 212150    | 578910    | 243280    | 146870   | 70484    | 309900    | 322890   |
| LIPID-P-1101 | TG(17.1_18.2_18.2) | 甘油三酯_TG(17.1_18.2_18.2) | GL      | 甘油酯类   | TG       | 甘油三酯   | C56H98O6   | 688330   | 574990   | 1612400   | 460840   | 1060700  | 2562500   | 2359600  | 2212800  | 1770900   | 3385300   | 4000300   | 2914700  | 399820   | 4804100   | 5134700  |
| LIPID-P-1102 | TG(15.0_18.1_20.4) | 甘油三酯_TG(15.0_18.1_20.4) | GL      | 甘油酯类   | TG       | 甘油三酯   | C56H98O6   | 1129500  | 856830   | 1211700   | 715810   | 1252800  | 1832900   | 1445100  | 1312100  | 1060700   | 2217400   | 1250700   | 851810   | 433780   | 1265600   | 1120800  |
| LIPID-P-1104 | TG(18.1_18.2_18.2) | 甘油三酯_TG(18.1_18.2_18.2) | GL      | 甘油酯类   | TG       | 甘油三酯   | C57H100O6  | 742500   | 5697100  | 8161200   | 4908700  | 7184400  | 11276000  | 17014000 | 14650000 | 10883000  | 14514000  | 27731000  | 18358000 | 7705300  | 21697000  | 25813000 |
| LIPID-P-1105 | TG(16.0_18.1_20.4) | 甘油三酯_TG(16.0_18.1_20.4) | GL      | 甘油酯类   | TG       | 甘油三酯   | C57H100O6  | 12267000 | 84530000 | 102830000 | 74103000 | 83270000 | 138880000 | 96870000 | 81174000 | 104970000 | 190160000 | 80285000  | 65099000 | 26373000 | 87233000  | 73144000 |
| LIPID-P-1106 | TG(16.1_18.1_20.3) | 甘油三酯_TG(16.1_18.1_20.3) | GL      | 甘油酯类   | TG       | 甘油三酯   | C57H100O6  | 8418000  | 6912800  | 10389000  | 6092300  | 10277000 | 15291000  | 2711800  | 13008000 | 7326400   | 19924000  | 6090600   | 3837100  | 661670   | 5377000   | 5226400  |
| LIPID-P-1107 | TG(16.0_17.0_22.5) | 甘油三酯_TG(16.0_17.0_22.5) | GL      | 甘油酯类   | TG       | 甘油三酯   | C58H102O6  | 375170   | 173740   | 515220    | 187480   | 356040   | 458630    | 275350   | 3900520  | 281250    | 696550    | 368240    | 222900   | 86319    | 160760    | 326100   |
| LIPID-P-1108 | TG(17.0_18.1_20.4) | 甘油三酯_TG(17.0_18.1_20.4) | GL      | 甘油酯类   | TG       | 甘油三酯   | C58H102O6  | 924420   | 769740   | 1423000   | 643960   | 956430   | 1760700   | 1331100  | 1362100  | 1124400   | 2433900   | 1075000   | 1081800  | 472990   | 1143600   | 1150500  |
| LIPID-P-1109 | TG(19.1_18.2_18.2) | 甘油三酯_TG(19.1_18.2_18.2) | GL      | 甘油酯类   | TG       | 甘油三酯   | C58H102O6  | 572720   | 408050   | 1198100   | 405940   | 628530   | 902890    | 960110   | 725100   | 1006100   | 1098800   | 1140200   | 381170   | 1669000  | 1437700   |          |
| LIPID-P-1111 | TG(18.1_18.2_20.2) | 甘油三酯_TG(18.1_18.2_20.2) | GL      | 甘油酯类   | TG       | 甘油三酯   | C59H104O6  | 7820300  | 6473600  | 14129000  | 6852700  | 7033600  | 12940000  | 11450000 | 8769100  | 6945400   | 18640000  | 10330000  | 8552300  | 2482300  | 10115000  | 14031000 |
| LIPID-P-1113 | TG(18.0_18.3_20.2) | 甘油三酯_TG(18.0_18.3_20.2) | GL      | 甘油酯类   | TG       | 甘油三酯   | C59H104O6  | 6048400  | 5477600  | 11491000  | 5138600  | 6469800  | 11551000  | 9302400  | 7897600  | 6931700   | 17431000  | 5686200   | 5063900  | 1177400  | 6747700   | 9974100  |
| LIPID-P-1114 | TG(16.0_18.1_22.4) | 甘油三酯_TG(16.0_18.1_22.4) | GL      | 甘油酯类   | TG       | 甘油三酯   | C59H104O6  | 10209000 | 7103200  | 23077000  | 7800200  | 13046000 | 26120000  | 11382000 | 17201000 | 14834000  | 34952000  | 11320000  | 8750500  | 2346100  | 14039000  | 15669000 |
| LIPID-P-1116 | TG(18.0_18.1_20.4) | 甘油三酯_TG(18.0_18.1_20.4) | GL      | 甘油酯类   | TG       | 甘油三酯   | C59H104O6  | 785900   | 6809800  | 14738000  | 9975900  | 8342000  | 16636000  | 12282000 | 17847000 | 10506000  | 17471000  | 11086000  | 12196000 | 3446400  | 9041900   | 15561000 |
| LIPID-P-1117 | TG(18.2_18.2_20.1) | 甘油三酯_TG(18.2_18.2_20.1) | GL      | 甘油酯类   | TG       | 甘油三酯   | C59H104O6  | 251100   | 1497900  | 4365900   | 2174100  | 1042900  | 3255600   | 3581700  | 2579000  | 2355900   | 5475600   | 4115400   | 3272700  | 884300   | 4171500   | 5008200  |
| LIPID-P-1118 | TG(17.1_18.1_21.3) | 甘油三酯_TG(17.1_18.1_21.3) | GL      | 甘油酯类   | TG       | 甘油三酯   | C60H106O6  | 617135   | 258373   | 117120    | 50002    | 58885    | 77675     | 33635    | 73194    | 39259     | 107050    | 5829.8    | 11651    | 2245.5   | 12790     | 25192    |
| LIPID-P-1120 | TG(17.0_18.0_22.5) | 甘油三酯_TG(17.0_18.0_22.5) | GL      | 甘油酯类   | TG       | 甘油三酯   | C60H106O6  | 53057    | 29751    | 122960    | 32716    | 38955    | 116020    | 68317    | 83078    | 78905     | 158650    | 62887     | 68698    | 15473    | 76436     | 102060   |
| LIPID-P-1122 | TG(18.2_18.2_21.5) | 甘油三酯_TG(18.2_18.2_21.5) | GL      | 甘油酯类   | TG       | 甘油三酯   | C61H108O6  | 541570   | 221870   | 510000    | 401160   | 544960   | 781740    | 505980   | 609770   | 375670    | 1355700   | 411990    | 496480   | 69948    | 479540    | 803360   |
| LIPID-P-1123 | TG(18.1_18.2_22.2) | 甘油三酯_TG(18.1_18.2_22.2) | GL      | 甘油酯类   | TG       | 甘油三酯   | C61H108O6  | 262320   | 119060   | 628220    | 197060   | 215920   | 342930    | 194710   | 254680   | 173830    | 491540    | 167460    | 160180   | 31201    | 156630    | 289760   |
| LIPID-P-1124 | TG(18.0_18.1_22.4) | 甘油三酯_TG(18.0_18.1_22.4) | GL      | 甘油酯类   | TG       | 甘油三酯   | C61H108O6  | 263430   | 317660   | 551180    | 310090   | 401340   | 1004000   | 336550   | 611830   | 475930    | 926430    | 253850    | 246500   | 154190   | 315210    | 410730   |
| LIPID-P-1125 | TG(16.0_18.1_24.0) | 甘油三酯_TG(16.0_18.1_24.0) | GL      | 甘油酯类   | TG       | 甘油三酯   | C61H108O6  | 583900   | 345500   | 1703500   | 602520   | 640960   | 857540    | 591730   | 583430   | 362400    | 1180600   | 113600    | 91158    | 32537    | 165250    | 147940   |
| LIPID-P-1126 | TG(24.1_18.2_18.2) | 甘油三酯_TG(24.1_18.2_18.2) | GL      | 甘油酯类   | TG       | 甘油三酯   | C63H112O6  | 21987    | 11875    | 89649     | 19047    | 31711    | 28462     | 18893    | 38952    | 16019     | 84373     | 12430     | 27844    | 4580.1   | 29121     | 34731    |
| LIPID-P-1128 | TG(16.0_18.2_16.4) | 甘油三酯_TG(16.0_18.2_16.4) | GL      | 甘油酯类   | TG       | 甘油三酯   | C53H90O6   | 39017    | 24526    | 211900    | 48488    | 64273    | 129980    | 108750   | 137010   | 101040    | 136480    | 111590    | 157490   | 94478    | 120690    | 245080   |
| LIPID-P-1129 | TG(14.1_18.2_18.3) | 甘油三酯_TG(14.1_18.2_18.3) | GL      | 甘油酯类   | TG       | 甘油三酯   | C53H90O6   | 37337    | 41644    | 164830    | 20848    | 56575    | 95774     | 49250    | 110520   | 65745     | 92097     | 149430    | 76151    | 60810    | 143770    | 105240   |
| LIPID-P-1130 | TG(14.0_16.1_20.5) | 甘油三酯_TG(14.0_16.1_20.5) | GL      | 甘油酯类   | TG       | 甘油三酯   | C53H90O6   | 122310   | 63638    | 249890    | 111940   | 148010   | 240940    | 109300   | 156030   | 122460    | 348160    | 212270    | 123170   | 108880   | 236480    | 367990   |
| LIPID-P-1132 | TG(12.0_16.0_22.6) | 甘油三酯_TG(12.0_16.0_22.6) | GL      | 甘油酯类   | TG       | 甘油三酯   | C53H90O6   | 65428    | 127950   | 677050    | 151690   | 147710   | 197950    | 226010   | 181290   | 246720    | 295820    | 121960    | 216970   | 148420   | 227420    | 314950   |
| LIPID-P-1135 | TG(16.0_16.1_20.5) | 甘油三酯_TG(16.0_16.1_20.5) | GL      | 甘油酯类   | TG       | 甘油三酯   | C55H94O6</ |          |          |           |          |          |           |          |          |           |           |           |          |          |           |          |

| Index        | Compounds          | 物质                      | Class I | 物质一級分类 | Class II | 物质二級分类 | Formula   | ND1     | ND2      | ND3      | ND4      | ND5      | HFD1     | HFD2     | HFD3     | HFD4     | HFD5     | AST-H1   | AST-H2   | AST-H3   | AST-H4   | AST-H5   |
|--------------|--------------------|-------------------------|---------|--------|----------|--------|-----------|---------|----------|----------|----------|----------|----------|----------|----------|----------|----------|----------|----------|----------|----------|----------|
| LIPID-P-1179 | TG(16:1_16:1_24:5) | 甘油三酯_TG(16:1_16:1_24:5) | GL      | 甘油酯类   | TG       | 甘油三酯   | C59H100O6 | 1643900 | 634360   | 6425600  | 800110   | 1428100  | 3159500  | 1393400  | 2056600  | 1311700  | 3310300  | 1575900  | 2037900  | 376230   | 2521500  | 2834500  |
| LIPID-P-1180 | TG(17:0_18:1_22:6) | 甘油三酯_TG(17:0_18:1_22:6) | GL      | 甘油酯类   | TG       | 甘油三酯   | C60H102O6 | 361520  | 188380   | 1097900  | 274280   | 337920   | 596200   | 403130   | 460820   | 407210   | 760190   | 470160   | 459630   | 246880   | 476050   | 583330   |
| LIPID-P-1182 | TG(18:1_18:1_22:5) | 甘油三酯_TG(18:1_18:1_22:5) | GL      | 甘油酯类   | TG       | 甘油三酯   | C61H104O6 | 553000  | 2698300  | 4437000  | 3141500  | 5625300  | 793900   | 3681700  | 6598300  | 3317400  | 10016000 | 3017100  | 2939200  | 1191700  | 2729100  | 4343100  |
| LIPID-P-1183 | TG(18:1_18:2_22:4) | 甘油三酯_TG(18:1_18:2_22:4) | GL      | 甘油酯类   | TG       | 甘油三酯   | C61H104O6 | 982520  | 775490   | 6054400  | 634450   | 871590   | 2575200  | 1829300  | 1764800  | 1564000  | 3050000  | 3827800  | 892460   | 3292100  | 4606900  |          |
| LIPID-P-1184 | TG(16:0_20:2_22:5) | 甘油三酯_TG(16:0_20:2_22:5) | GL      | 甘油酯类   | TG       | 甘油三酯   | C61H104O6 | 1129400 | 704800   | 4476500  | 499150   | 1093000  | 1397600  | 733720   | 1024500  | 667340   | 1737900  | 890850   | 1239900  | 335970   | 1154400  | 1453900  |
| LIPID-P-1185 | TG(18:0_18:1_22:6) | 甘油三酯_TG(18:0_18:1_22:6) | GL      | 甘油酯类   | TG       | 甘油三酯   | C61H104O6 | 460160  | 511350   | 1039600  | 552590   | 549510   | 740630   | 376730   | 424420   | 435860   | 681670   | 505190   | 559650   | 171340   | 526640   | 696480   |
| LIPID-P-1186 | TG(19:0_18:1_22:6) | 甘油三酯_TG(19:0_18:1_22:6) | GL      | 甘油酯类   | TG       | 甘油三酯   | C62H106O6 | 37005   | 29378    | 106800   | 30515    | 50843    | 48228    | 42000    | 49647    | 34900    | 85885    | 33004    | 53231    | 5998.1   | 24260    | 60112    |
| LIPID-P-1187 | TG(18:1_20:1_22:5) | 甘油三酯_TG(18:1_20:1_22:5) | GL      | 甘油酯类   | TG       | 甘油三酯   | C63H108O6 | 32217   | 31604    | 361900   | 34791    | 37006    | 56410    | 70307    | 94425    | 41638    | 167750   | 118180   | 88511    | 8685.9   | 72040    | 173560   |
| LIPID-P-1188 | TG(18:0_18:1_24:6) | 甘油三酯_TG(18:0_18:1_24:6) | GL      | 甘油酯类   | TG       | 甘油三酯   | C63H108O6 | 28423   | 12663    | 363340   | 22753    | 39521    | 52596    | 16651    | 29269    | 27241    | 78415    | 19598    | 17914    | 7852.9   | 14891    | 31045    |
| LIPID-P-1189 | TG(18:0_20:1_22:6) | 甘油三酯_TG(18:0_20:1_22:6) | GL      | 甘油酯类   | TG       | 甘油三酯   | C63H108O6 | 24093   | 34940    | 171360   | 39271    | 43394    | 79599    | 50897    | 63477    | 31774    | 89278    | 38579    | 59450    | 27417    | 45639    | 79654    |
| LIPID-P-1190 | TG(16:0_22:1_22:6) | 甘油三酯_TG(16:0_22:1_22:6) | GL      | 甘油酯类   | TG       | 甘油三酯   | C63H108O6 | 36575   | 28682    | 292210   | 16211    | 41908    | 51613    | 35846    | 29212    | 31638    | 46523    | 13598    | 27988    | 12991    | 23033    | 29898    |
| LIPID-P-1192 | TG(18:1_22:1_22:5) | 甘油三酯_TG(18:1_22:1_22:5) | GL      | 甘油酯类   | TG       | 甘油三酯   | C65H112O6 | 35575   | 30798    | 455430   | 47635    | 55435    | 73683    | 42236    | 28916    | 22741    | 124440   | 10738    | 7647.9   | 1533.2   | 13453    | 13401    |
| LIPID-P-1193 | TG(14:1_16:1_22:6) | 甘油三酯_TG(14:1_16:1_22:6) | GL      | 甘油酯类   | TG       | 甘油三酯   | C55H90O6  | 92061   | 92382    | 596050   | 138530   | 123160   | 191560   | 181840   | 202360   | 162780   | 219760   | 185710   | 208300   | 124140   | 254290   | 248590   |
| LIPID-P-1196 | TG(18:2_18:3_18:3) | 甘油三酯_TG(18:2_18:3_18:3) | GL      | 甘油酯类   | TG       | 甘油三酯   | C65H112O6 | 114830  | 92771    | 571420   | 94198    | 118960   | 227870   | 211480   | 262290   | 163140   | 389120   | 710250   | 653420   | 306950   | 921910   | 1036900  |
| LIPID-P-1197 | TG(16:1_16:1_22:6) | 甘油三酯_TG(16:1_16:1_22:6) | GL      | 甘油酯类   | TG       | 甘油三酯   | C57H94O6  | 125940  | 505850   | 5774500  | 901060   | 1260400  | 1436700  | 942270   | 1326000  | 942480   | 1919100  | 1636300  | 1198000  | 495670   | 1399900  | 1900300  |
| LIPID-P-1199 | TG(18:1_18:2_20:5) | 甘油三酯_TG(18:1_18:2_20:5) | GL      | 甘油酯类   | TG       | 甘油三酯   | C59H98O6  | 37466   | 30689    | 32804    | 61286    | 71052    | 62086    | 48680    | 39108    | 46485    | 114800   | 17135    | 5940.4   | 9        | 10671    | 6682.5   |
| LIPID-P-1200 | TG(16:0_18:2_22:6) | 甘油三酯_TG(16:0_18:2_22:6) | GL      | 甘油酯类   | TG       | 甘油三酯   | C59H98O6  | 2532200 | 11763000 | 76804000 | 13907000 | 18967000 | 34499000 | 23489000 | 26389000 | 24284000 | 40024000 | 55461000 | 35880000 | 15506000 | 5862000  | 64245000 |
| LIPID-P-1201 | TG(16:1_18:1_22:6) | 甘油三酯_TG(16:1_18:1_22:6) | GL      | 甘油酯类   | TG       | 甘油三酯   | C59H98O6  | 2558800 | 917350   | 7643900  | 1399500  | 2253300  | 3802600  | 1887100  | 2411100  | 1061400  | 3963300  | 2338900  | 1808600  | 553370   | 3008500  | 3100400  |
| LIPID-P-1202 | TG(16:1_16:1_24:6) | 甘油三酯_TG(16:1_16:1_24:6) | GL      | 甘油酯类   | TG       | 甘油三酯   | C59H98O6  | 518190  | 297990   | 1098500  | 2107300  | 4055500  | 6337600  | 4919800  | 4490100  | 4887000  | 7060100  | 10279000 | 8770200  | 2556400  | 9303400  | 13235000 |
| LIPID-P-1203 | TG(17:0_18:2_22:6) | 甘油三酯_TG(17:0_18:2_22:6) | GL      | 甘油酯类   | TG       | 甘油三酯   | C60H100O6 | 400150  | 188870   | 1062400  | 269250   | 346940   | 614400   | 517610   | 660070   | 448150   | 881020   | 694890   | 618220   | 228550   | 655890   | 1016300  |
| LIPID-P-1204 | TG(18:1_18:2_22:5) | 甘油三酯_TG(18:1_18:2_22:5) | GL      | 甘油酯类   | TG       | 甘油三酯   | C61H102O6 | 2113500 | 1588900  | 31656000 | 1285900  | 2466700  | 2287300  | 3387300  | 2478100  | 2432600  | 5215600  | 3468200  | 4087800  | 1275700  | 2875600  | 4827900  |
| LIPID-P-1205 | TG(18:1_18:1_22:6) | 甘油三酯_TG(18:1_18:1_22:6) | GL      | 甘油酯类   | TG       | 甘油三酯   | C61H102O6 | 623600  | 3618500  | 21977000 | 4735600  | 5285400  | 7756500  | 4858800  | 5235800  | 4341000  | 7428100  | 7034100  | 6370300  | 2480100  | 6280600  | 9778800  |
| LIPID-P-1206 | TG(18:0_18:2_22:6) | 甘油三酯_TG(18:0_18:2_22:6) | GL      | 甘油酯类   | TG       | 甘油三酯   | C61H102O6 | 1835800 | 10177000 | 50873000 | 15383000 | 10468000 | 21954000 | 13475000 | 15011000 | 12516000 | 18647000 | 14535000 | 14541000 | 5587300  | 17178000 | 10359000 |
| LIPID-P-1207 | TG(18:2_18:2_22:4) | 甘油三酯_TG(18:2_18:2_22:4) | GL      | 甘油酯类   | TG       | 甘油三酯   | C61H102O6 | 102760  | 69440    | 880930   | 99293    | 234300   | 273170   | 243760   | 304320   | 190890   | 425970   | 984120   | 219340   | 966200   | 1243800  |          |
| LIPID-P-1208 | TG(17:1_17:1_24:6) | 甘油三酯_TG(17:1_17:1_24:6) | GL      | 甘油酯类   | TG       | 甘油三酯   | C61H102O6 | 491970  | 289700   | 2130500  | 288900   | 502470   | 894110   | 428680   | 626560   | 567000   | 1048100  | 683920   | 836020   | 233820   | 744520   | 989410   |
| LIPID-P-1209 | TG(18:1_20:1_22:6) | 甘油三酯_TG(18:1_20:1_22:6) | GL      | 甘油酯类   | TG       | 甘油三酯   | C63H106O6 | 923550  | 420850   | 3864100  | 812910   | 540200   | 956280   | 514150   | 664400   | 480930   | 844480   | 379950   | 526740   | 85749    | 504460   | 717770   |
| LIPID-P-1210 | TG(18:1_20:3_22:4) | 甘油三酯_TG(18:1_20:3_22:4) | GL      | 甘油酯类   | TG       | 甘油三酯   | C63H106O6 | 665920  | 313850   | 4518200  | 417160   | 582930   | 689770   | 411130   | 648640   | 304490   | 1007800  | 563290   | 482000   | 155100   | 466980   | 829390   |
| LIPID-P-1211 | TG(18:1_22:1_22:6) | 甘油三酯_TG(18:1_22:1_22:6) | GL      | 甘油酯类   | TG       | 甘油三酯   | C65H110O6 | 89284   | 20649    | 124420   | 51092    | 45238    | 74314    | 33550    | 49336    | 20651    | 91488    | 7542.9   | 16074    | 5351.7   | 15584    | 23629    |
| LIPID-P-1214 | TG(16:1_16:2_22:6) | 甘油三酯_TG(16:1_16:2_22:6) | GL      | 甘油酯类   | TG       | 甘油三酯   | C57H92O6  | 71329   | 61728    | 606140   | 81594    | 104700   | 152390   | 122790   | 184450   | 135610   | 260350   | 212480   | 246970   | 195530   | 287520   | 415390   |
| LIPID-P-1215 | TG(16:1_18:2_22:6) | 甘油三酯_TG(16:1_18:2_22:6) | GL      | 甘油酯类   | TG       | 甘油三酯   | C59H96O6  | 1853900 | 1031300  | 10060000 | 1201200  | 1844500  | 3330300  | 2152100  | 3518000  | 2418700  | 4303000  | 5841300  | 4435000  | 1929400  | 5896400  | 8487600  |
| LIPID-P-1216 | TG(18:2_18:3_20:4) | 甘油三酯_TG(18:2_18:3_20:4) | GL      | 甘油酯类   | TG       | 甘油三酯   | C59H96O6  | 1144800 | 1072900  | 2199100  | 889830   | 1359600  | 1746500  | 1088400  | 1640300  | 1096100  | 1798500  | 2015700  | 1438500  | 663150   | 2366600  | 2542800  |
| LIPID-P-1217 | TG(18:1_18:2_22:6) | 甘油三酯_TG(18:1_18:2_22:6) | GL      | 甘油酯类   | TG       | 甘油三酯   | C61H100O6 | 6407100 | 4288300  | 26949000 | 3749400  | 6206600  | 10216000 | 7435300  | 7296600  | 6275200  | 9654600  | 17323000 | 13931000 | 5436200  | 16956000 | 21615000 |
| LIPID-P-1218 | TG(18:2_20:3_20:4) | 甘油三酯_TG(18:2_20:3_20:4) | GL      | 甘油酯类   | TG       | 甘油三酯   | C61H100O6 | 7249900 | 7313300  | 8574300  | 6028700  | 8018500  | 11841000 | 7768000  | 8223000  | 5965600  | 8092800  | 6945100  | 5498500  | 1506500  | 6188700  | 6899000  |
| LIPID-P-1219 | TG(16:0_20:4_22:5) | 甘油三酯_TG(16:0_20:4_22:5) | GL      | 甘油酯类   | TG       | 甘油三酯   | C61H100O6 | 548820  | 346550   | 6236600  | 254390   | 556150   | 718120   | 831430   | 673350   | 579190   | 1153400  | 1914400  | 2043600  | 343850   | 1481100  | 1772400  |
| LIPID-P-1220 | TG(20:1_18:2_22:6) | 甘油三酯_TG(20:1_18:2_22:6) | GL      | 甘油酯类   | TG       | 甘油三酯   | C63H104O6 | 664340  | 374340   | 3270800  | 425990   | 680810   | 777240   | 439010   | 691570   | 358310   | 856060   | 735860   | 834310   | 233530   | 657040   | 920630   |
| LIPID-P-1221 | TG(18:0_20:4_22:5) | 甘油三酯_TG(18:0_20:4_22:5) | GL      | 甘油酯类   | TG       | 甘油三酯   | C63H104O6 | 57234   | 31891    | 121870   | 45849    | 62770    | 72094    | 50252    | 78215    | 48631    | 60372    | 50695    | 83649    | 17666    | 72079    | 76184    |
| LIPID-P-1223 | TG(18:2_18:3_20:5) | 甘油三酯_TG(18:2_18:3_20:5) | GL      | 甘油酯类   | TG       | 甘油三酯   | C59H94O6  | 12614   | 11280    | 150330   | 2866.5   | 35630    | 54545    | 23410    | 46422    | 30646    | 94021    | 124480   | 120720   | 48103    | 124160   | 145130   |
| LIPID-P-1224 | TG(16:1_20:4_20:5) | 甘油三酯_TG(16:1_20:4_20:5) | GL      | 甘油酯类   | TG       | 甘油三酯   | C59H94O6  | 36993   | 18647    | 97293    | 22618    | 48588    | 44687    | 28089    | 53155    | 31756    | 85647    | 199150   | 177630   | 73739    | 222870   | 284200   |
| LIPID-P-1226 | TG(18:2_18:2_22:6) | 甘油三酯_TG(18:2_18:2_22:6) | GL      | 甘油酯类   | TG       | 甘油三酯   | C61H98O6  | 480960  | 284110   | 5074800  | 327260   | 495290   | 575480   | 921160   | 1126300  | 561600   | 1030200  | 3506800  | 3530100  | 1087700  | 4175500  | 5400800  |
| LIPID-P-1227 | TG(18:2_20:4_20:4) | 甘油三酯_TG(18:2_20:4_20:4) | GL      | 甘油酯类   | TG       | 甘油三酯   | C61H98O6  | 298030  | 243390   | 1540400  | 206600   | 224430   | 341770   | 368560   | 566240   | 301590   | 441290   | 1527700  | 1418300  | 490870   | 1764800  | 2073600  |
| LIPID-P-1229 | TG(16:0_20:4_22:6) | 甘油三酯_TG(16:0_20:4_22:6) | GL      | 甘油酯类   | TG       | 甘油三酯   | C61H98O6  | 970350  | 812410   | 1926600  | 845590   | 1049800  | 1682600  | 1140200  | 680100   | 1005800  | 1289100  | 1033200  |          |          |          |          |
